# Supplementary material for: Analysis of cancer genomes reveals basic features of human aging and its role in cancer development
Source: PubMed Central journal article supplement (PMC4990632; doi:10.1038/ncomms12157), 2016-08-12
Supplement: ncomms12157-s1.pdf [file ncomms12157-s1.pdf]

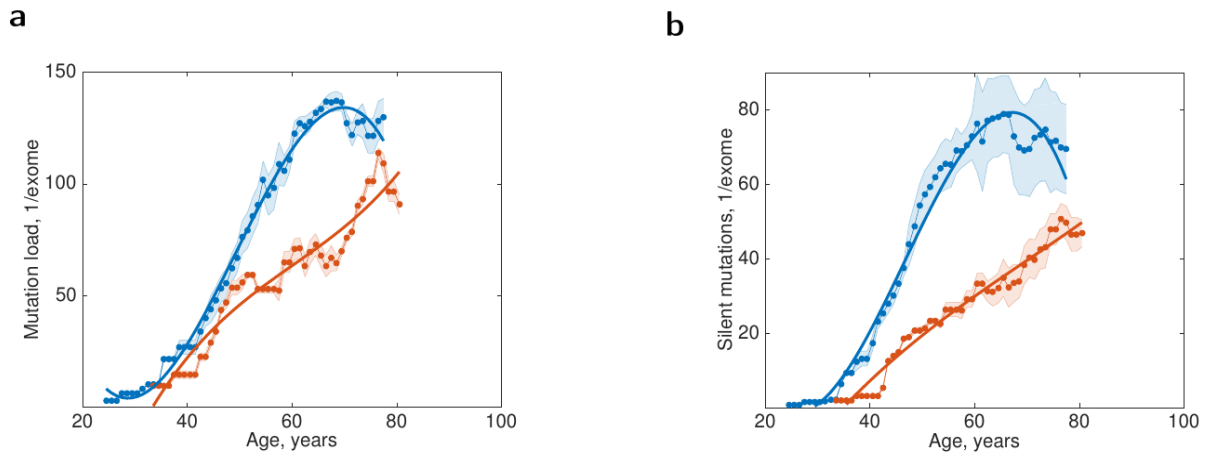

**Supplementary Figure 1** | Characteristic somatic mutation load in bladder urothelial carcinoma (BLCA). Men (blue) vs. women (red). **a.** BI, IlluminaGA DNaseq, automated pipeline, all mutations. **b.** BI, IlluminaGA, DNaseq, automated pipeline, silent mutations only.

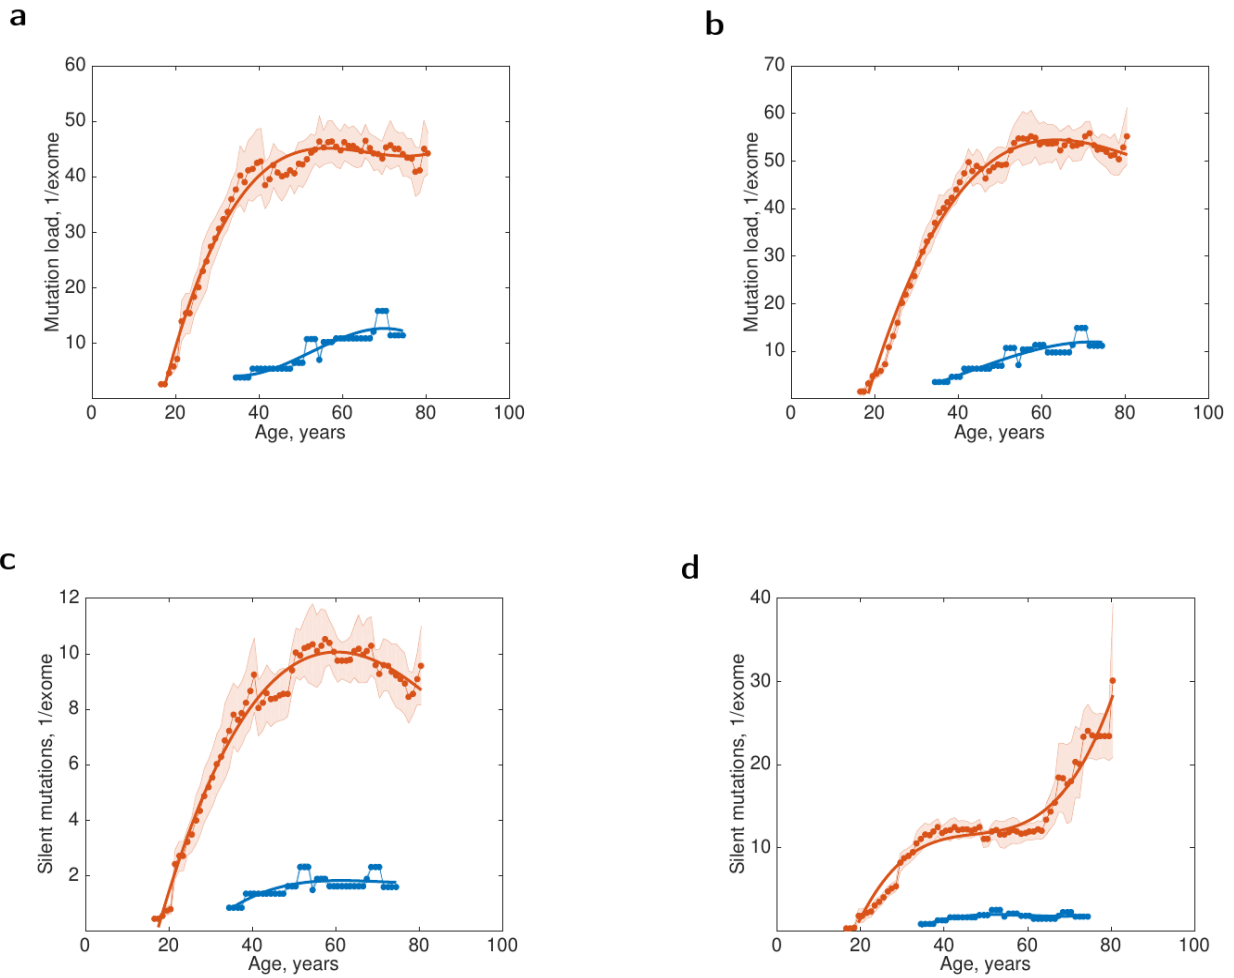

**Supplementary Figure 2** | Characteristic somatic mutation load in breast invasive carcinoma (BRCA). Men (blue) vs. women (red). **a.** WUSM, IlluminaGA DNaseq, automated pipeline, all mutations. **b.** WUSM, IlluminaGA, DNaseq, curated pipeline, all mutations. **c.** WUSM, IlluminaGA DNaseq, silent mutations only. **d.** WUSM, IlluminaGA DNaseq, curated pipeline, silent mutations only.

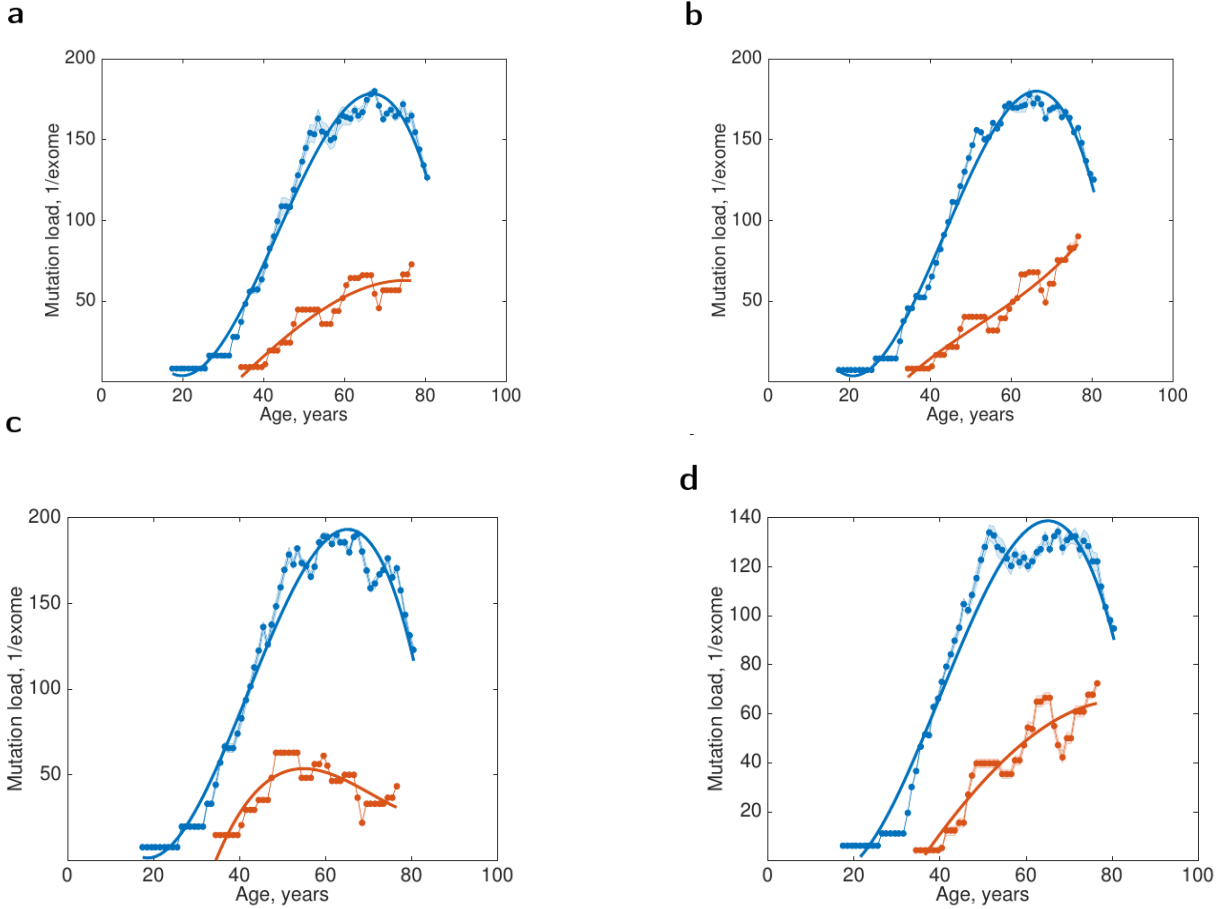

**Supplementary Figure 3** | Characteristic somatic mutation load in esophageal carcinoma (ESCA), all mutations. Men (blue) vs. women (red). **a.** BCGSC, IlluminaHISeq DNaseq, automated pipeline. **b.** BI, IlluminaGA, automated pipeline. **c.** BCM, IlluminaGA DNaseq, automated pipeline. **d.** UCSC, IlluminaGA, IlluminaGA DNaseq, automated pipeline.

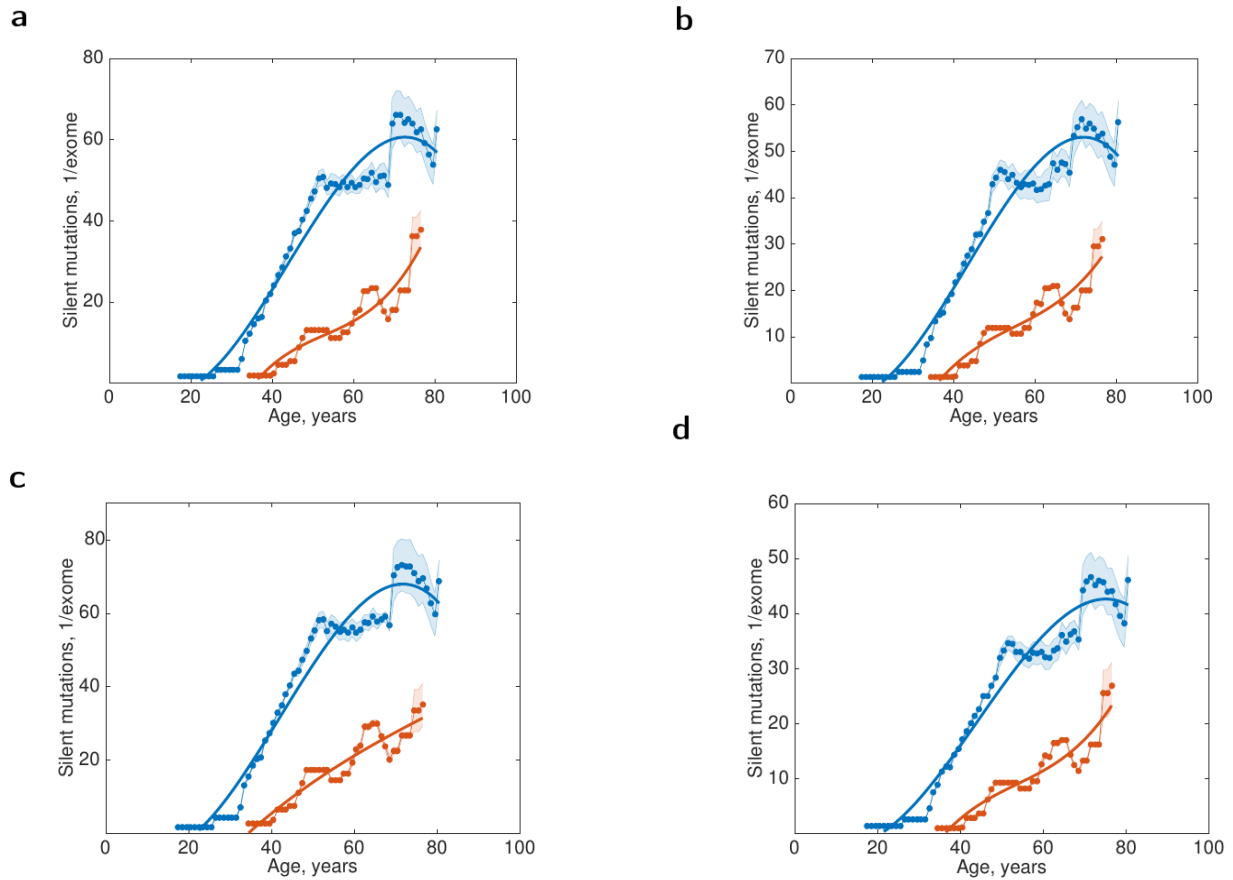

**Supplementary Figure 4** | Characteristic somatic mutation load in esophageal carcinoma (ESCA), silent mutations only. Men (blue) vs. women (red). **a.** BSGSC, IlluminaHiSeq DNaseSeq, automated pipeline. **b.** BI, IlluminaGA, automated pipeline. **c.** BCM, IlluminaGA DNaseSeq, automated pipeline. **d.** UCSC, IlluminaGA, automated pipeline.

**a**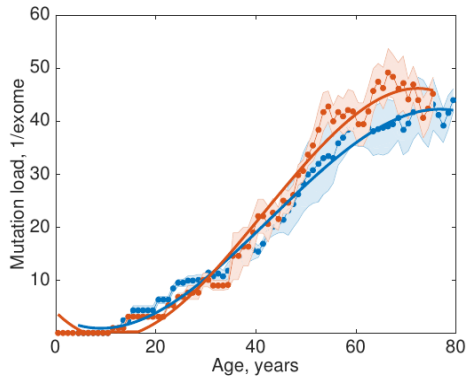**b**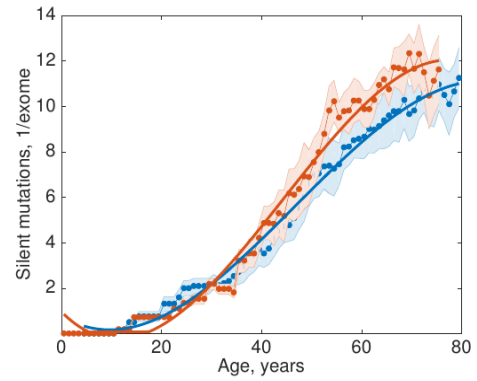

**Supplementary Figure 5** | Characteristic somatic mutation load in glioblastoma multiforme (GBM). Men (blue) vs. women (red). **a.** BI, IlluminaGA DNaseq, all mutations. **b.** BI, IlluminaGA DNaseq, silent mutations only.

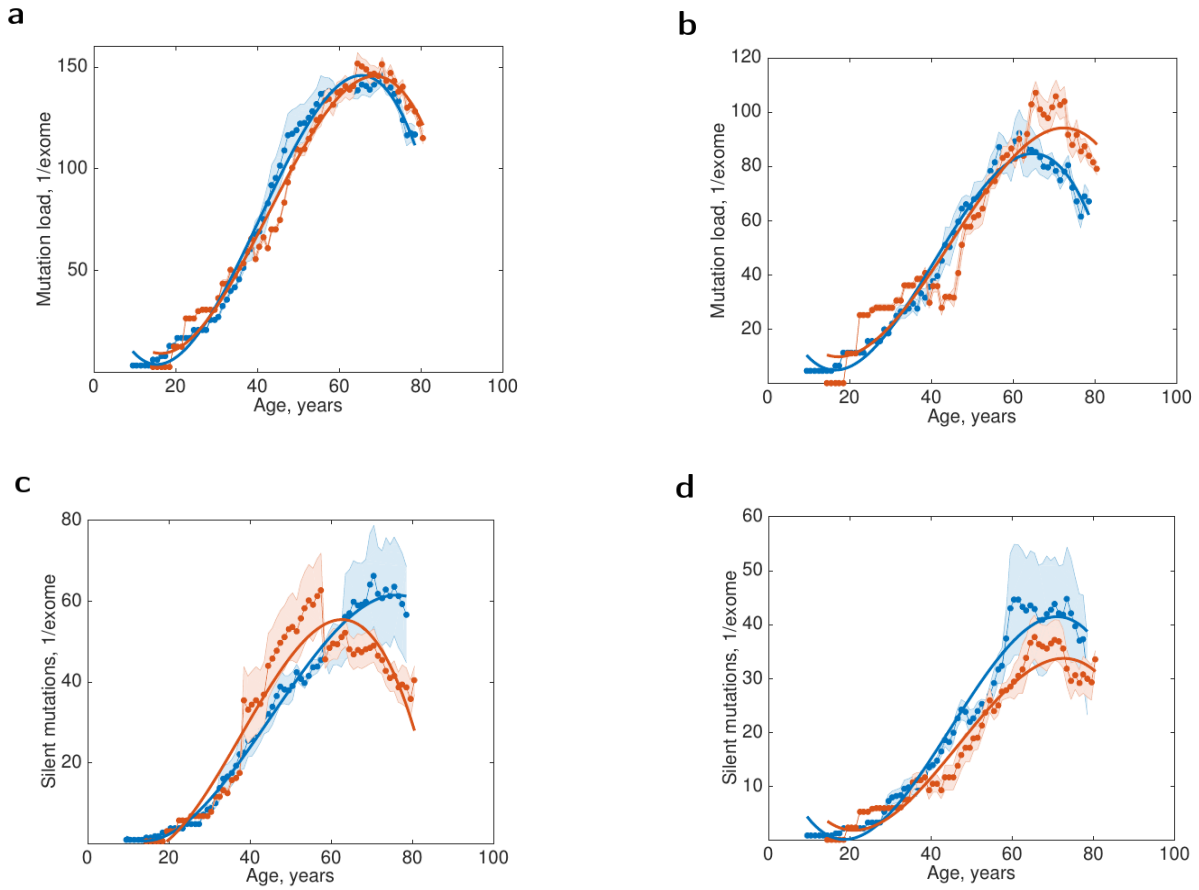

**Supplementary Figure 6** | Characteristic somatic mutation load in head and neck squamous cell carcinoma (HNSC). Men (blue) vs. women (red). **a.** BI, IlluminaGA DNaseq, automated pipeline, all mutations. **b.** BI, IlluminaGA DNaseq, all mutations. **c.** BI, IlluminaGA DNaseq, automated pipeline, silent mutations only. **d.** BI, IlluminaGA DNaseq, silent mutations only.

**a**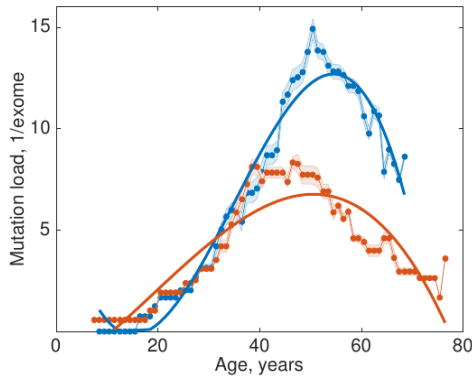**b**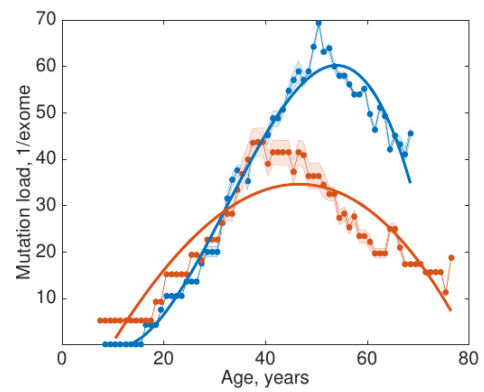

**Supplementary Figure 7** | Characteristic somatic mutation load in kidney chromophobe (KICH), all mutations. Men (blue) vs. women (red). **a.** BCM, IlluminaGA DNaseSeq. **b.** BCM, mixed IlluminaGA DNaseSeq and SOLiD.

**a**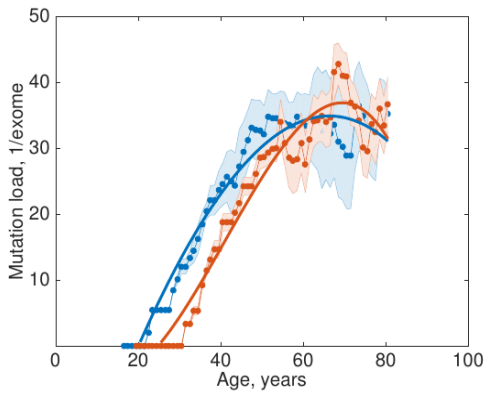**b**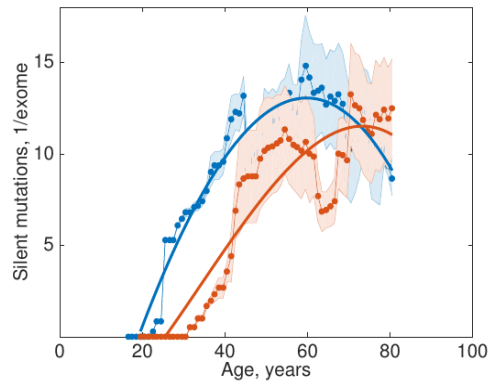

**Supplementary Figure 8** | Characteristic somatic mutation load in kidney renal clear cell carcinoma (KIRC). Men (blue) vs. women (red). **a.** BI, IlluminaGA DNaseSeq, automated pipeline, all mutations. **b.** BCM, mixed IlluminaGA and SOLiD, silent mutations only.

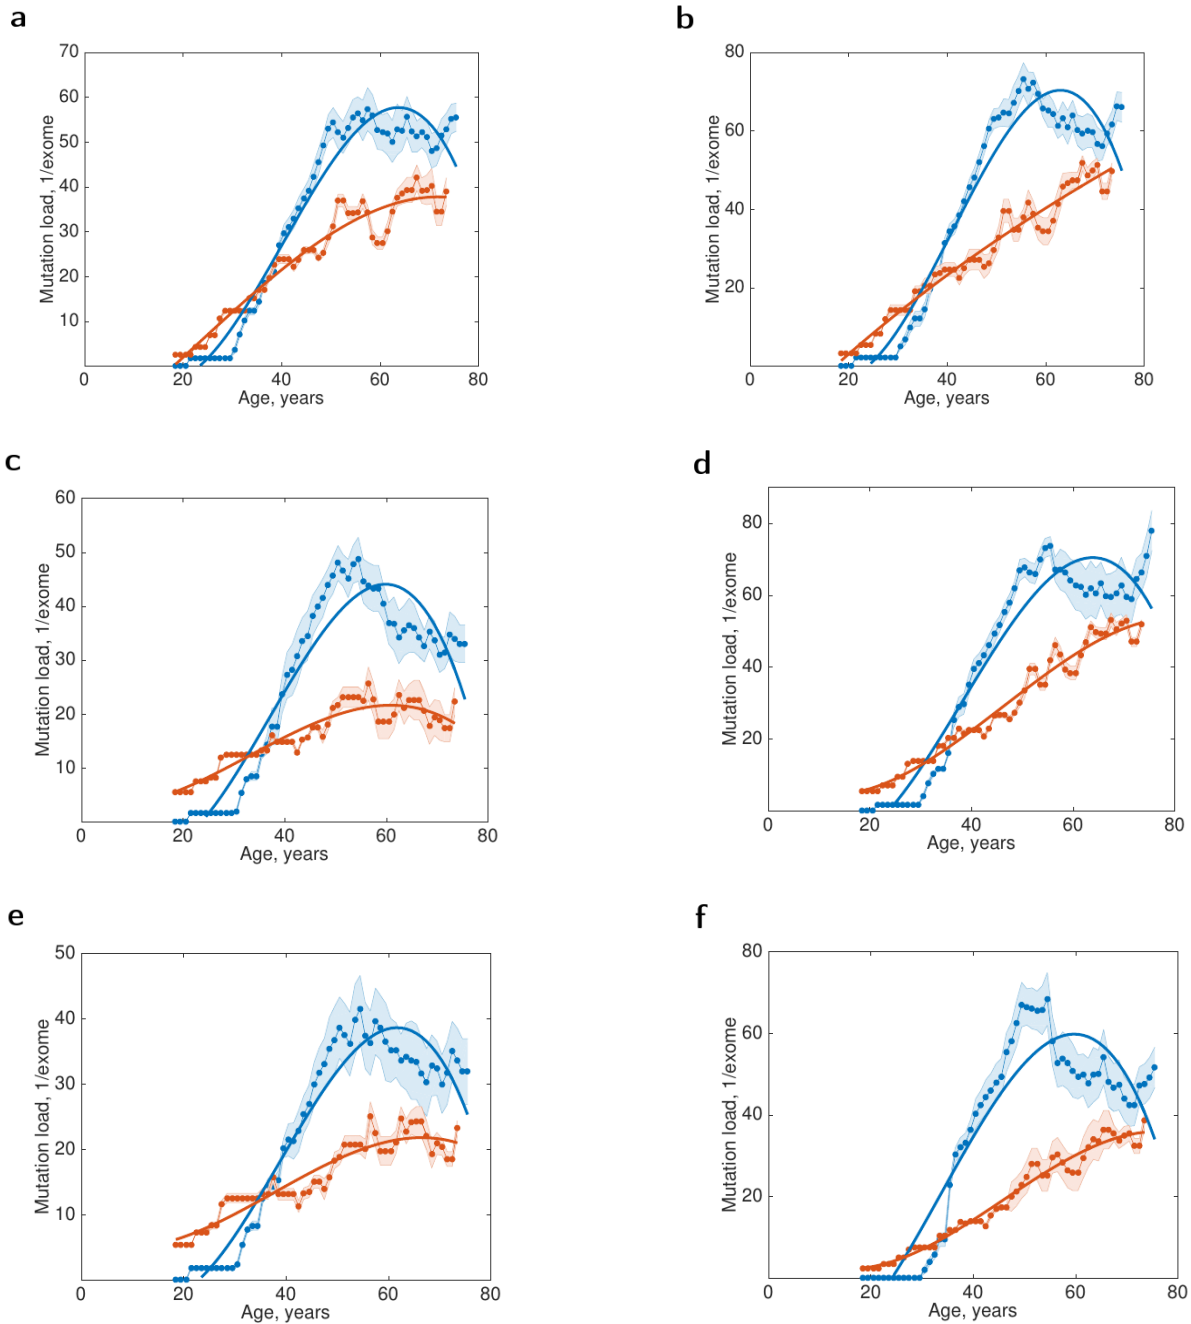

**Supplementary Figure 9** | Characteristic somatic mutation load in kidney renal papillary cell carcinoma (KIRP), all mutations. Men (blue) vs. women (red). **a.** BCM, IlluminaGA DNaseq, curated pipeline. **b.** BCM, mixed IlluminaGA and SOLiD. **c.** BI, IlluminaGA DNaseq, automated pipeline. **d.** BI, IlluminaGA DNaseq, curated pipeline. **e.** BI, IlluminaGA DNaseq. **f.** UCSC, IlluminaGA DNaseq, automated pipeline.



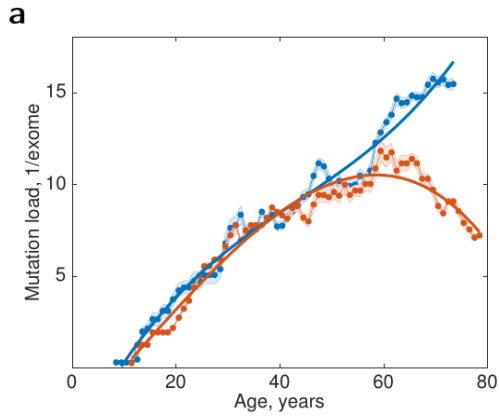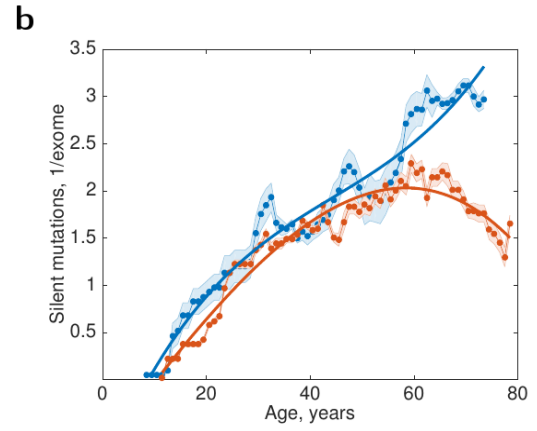

**Supplementary Figure 10** | Characteristic somatic mutation load in acute myeloid leukemia (LAML). Men (blue) vs. women (red). **a.** WUSM, IlluminaGA DNaseq, all mutations. **b.** WUSM, IlluminaGA DNaseq, silent mutations only.

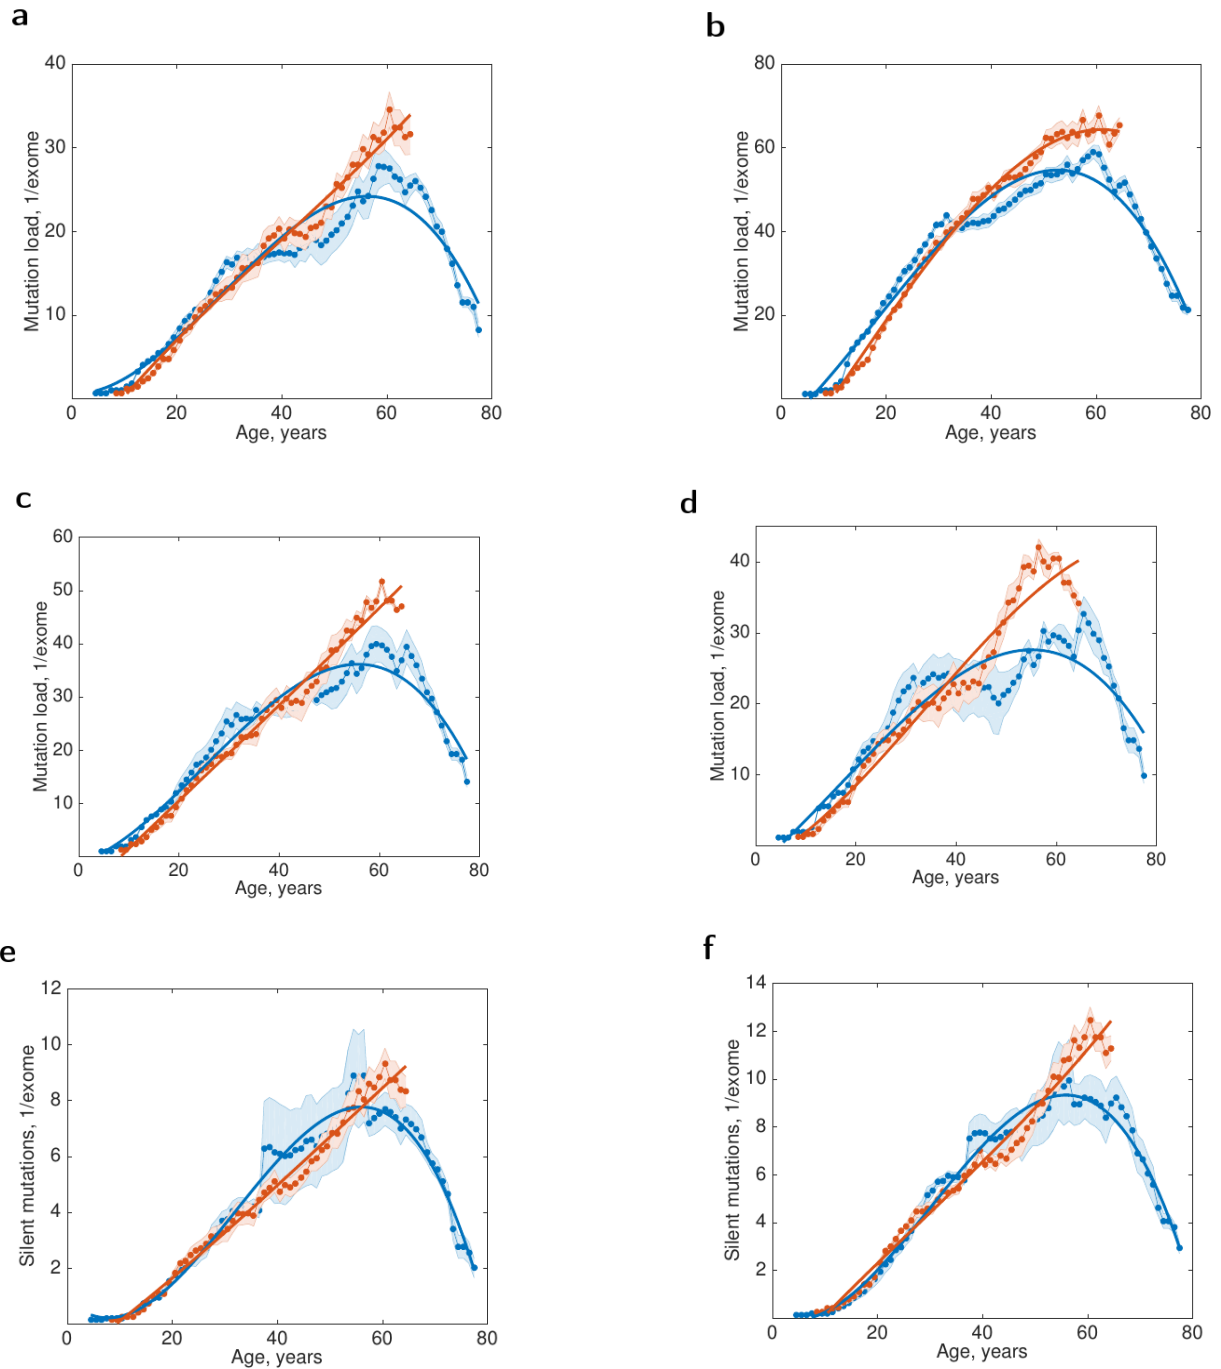

**Supplementary Figure 11** | Characteristic somatic mutation load in brain lower grade glioma (LGG). Men (blue) vs. women (red). **a.** BCM, IlluminaGA DNaseq, automated pipeline, all mutations. **b.** BI, IlluminaGA DNaseq, curated pipeline, all mutations. **c.** BI, IlluminaGA DNaseq, all mutations. **d.** BI, IlluminaGA DNaseq, curated pipeline, silent mutations only. **e.** BCM, IlluminaGA DNaseq, automated pipeline, silent mutations only. **f.** BI, IlluminaGA DNaseq, silent mutations only.

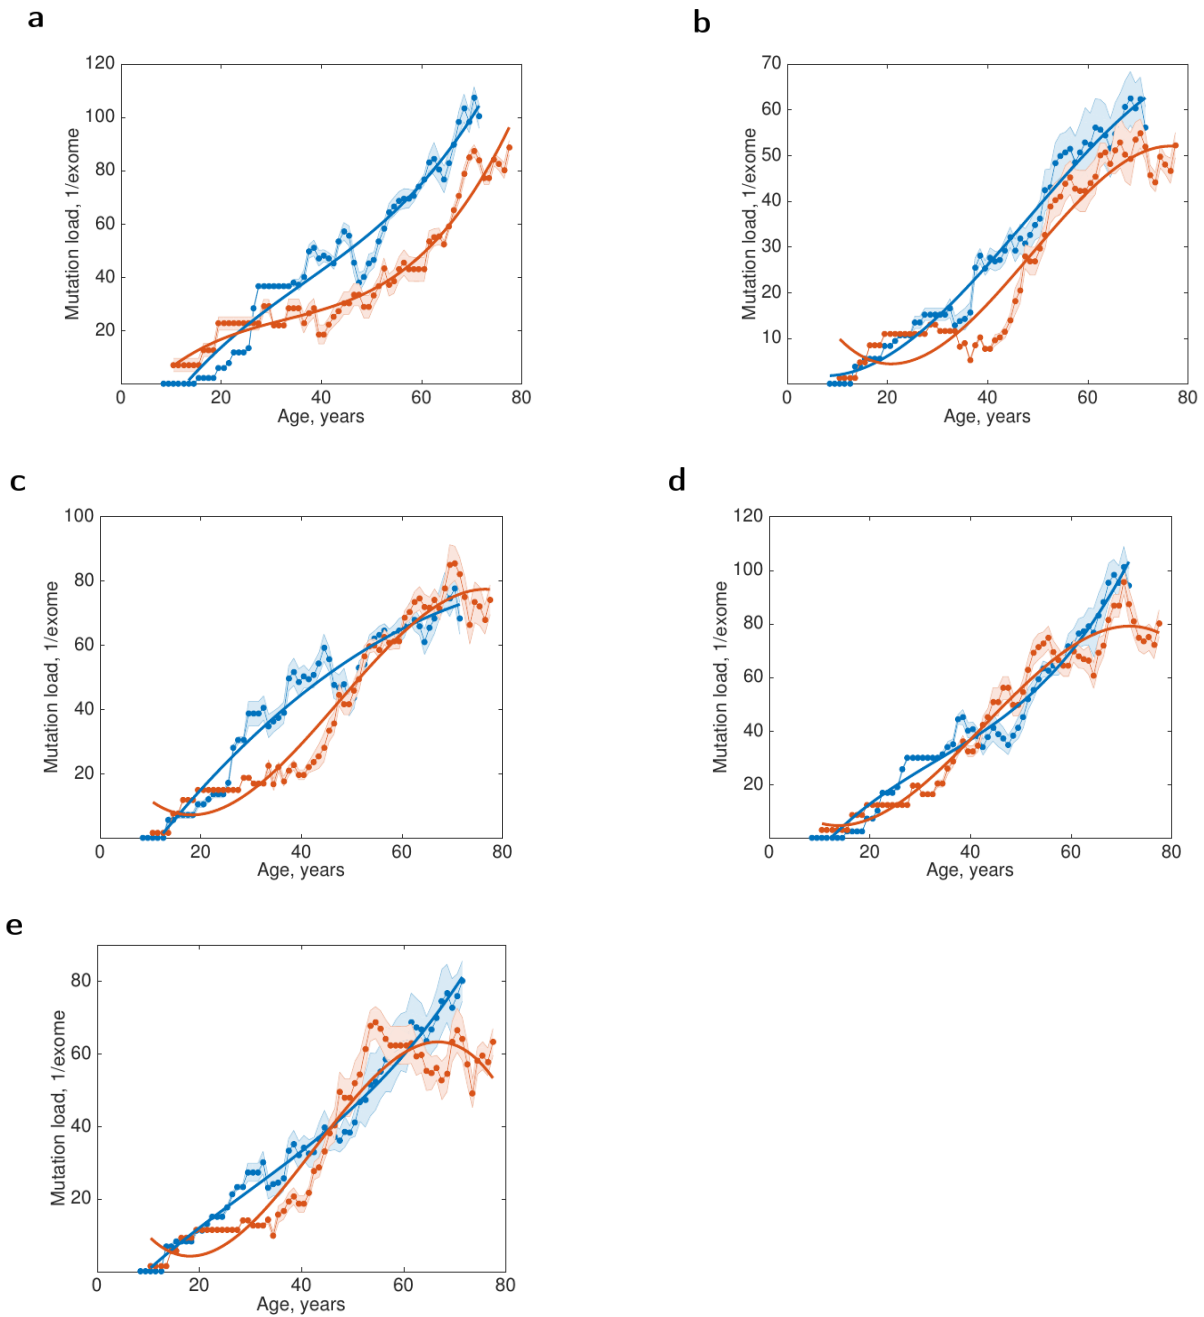

**Supplementary Figure 12** | Characteristic somatic mutation load in liver hepatocellular carcinoma (LIHC), all mutations. Men (blue) vs. women (red). **a.** BCGSC, IlluminaHiSeq DNaseq, automated pipeline. **b.** BCM, IlluminaGA DNaseq, automated pipeline. **c.** BCM, mixed IlluminaGA and SOLiD, curated pipeline. **d.** BI, IlluminaGA DNaseq, automated pipeline. **e.** UCSC, IlluminaGA DNaseq, automated pipeline.

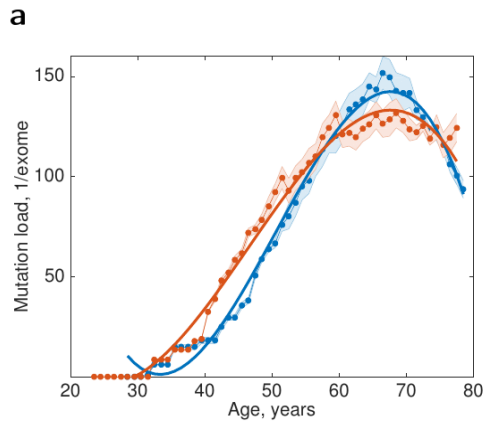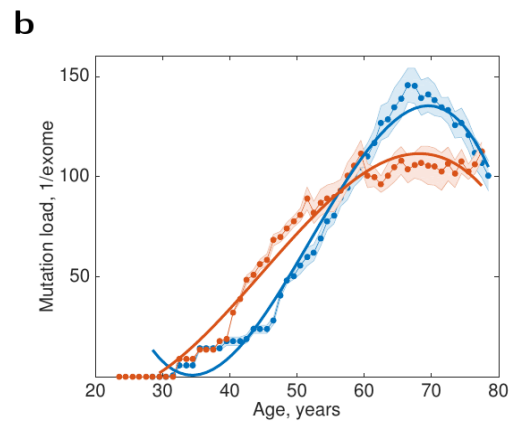

**Supplementary Figure 13** | Characteristic somatic mutation load in lung adenocarcinoma (LUAD). Men (blue) vs. women (red). **a.** BI, IlluminaGA DNaseq, automated pipeline, all mutations. **b.** BI, IlluminaGA DNaseq, all mutations.

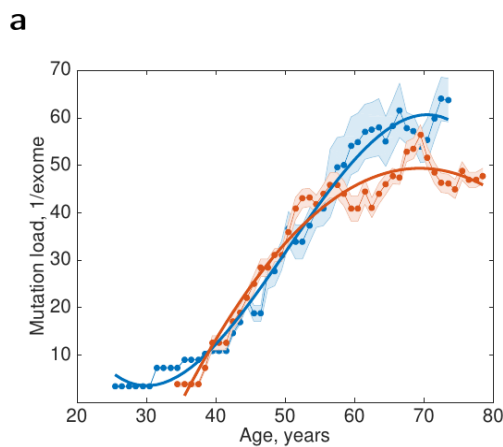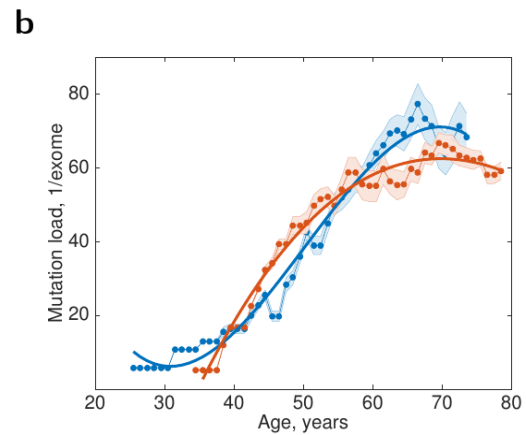

**Supplementary Figure 14** | Characteristic somatic mutation load in pancreatic adenocarcinoma (PAAD), all mutations. Men (blue) vs. women (red). **a.** BCGSC, IlluminaHiSeq DNaseq, automated pipeline. **b.** BI, IlluminaGA DNaseq, automated pipeline.

**a**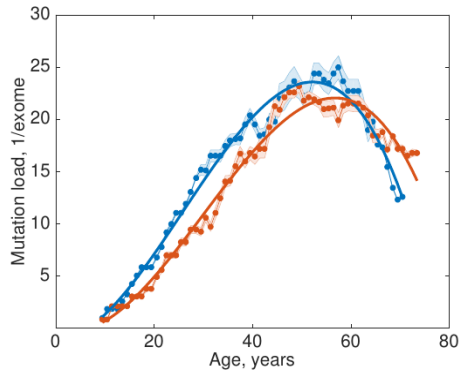**b**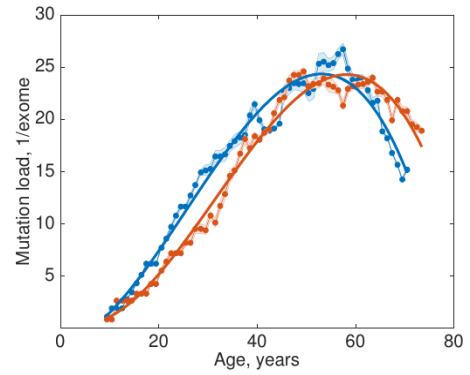**c**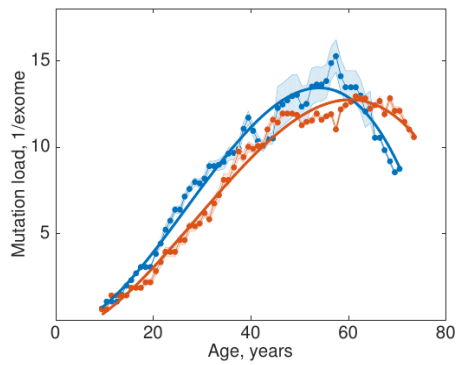

**Supplementary Figure 15** | Characteristic somatic mutation load in pheochromocytoma and paraganglioma (PCPG), all mutations. Men (blue) vs. women (red). **a.** BCM, IlluminaGA DNaseq, automated pipeline. **b.** BI, IlluminaGA DNaseq, automated pipeline. **c.** UCSC, IlluminaGA DNaseq, automated pipeline.

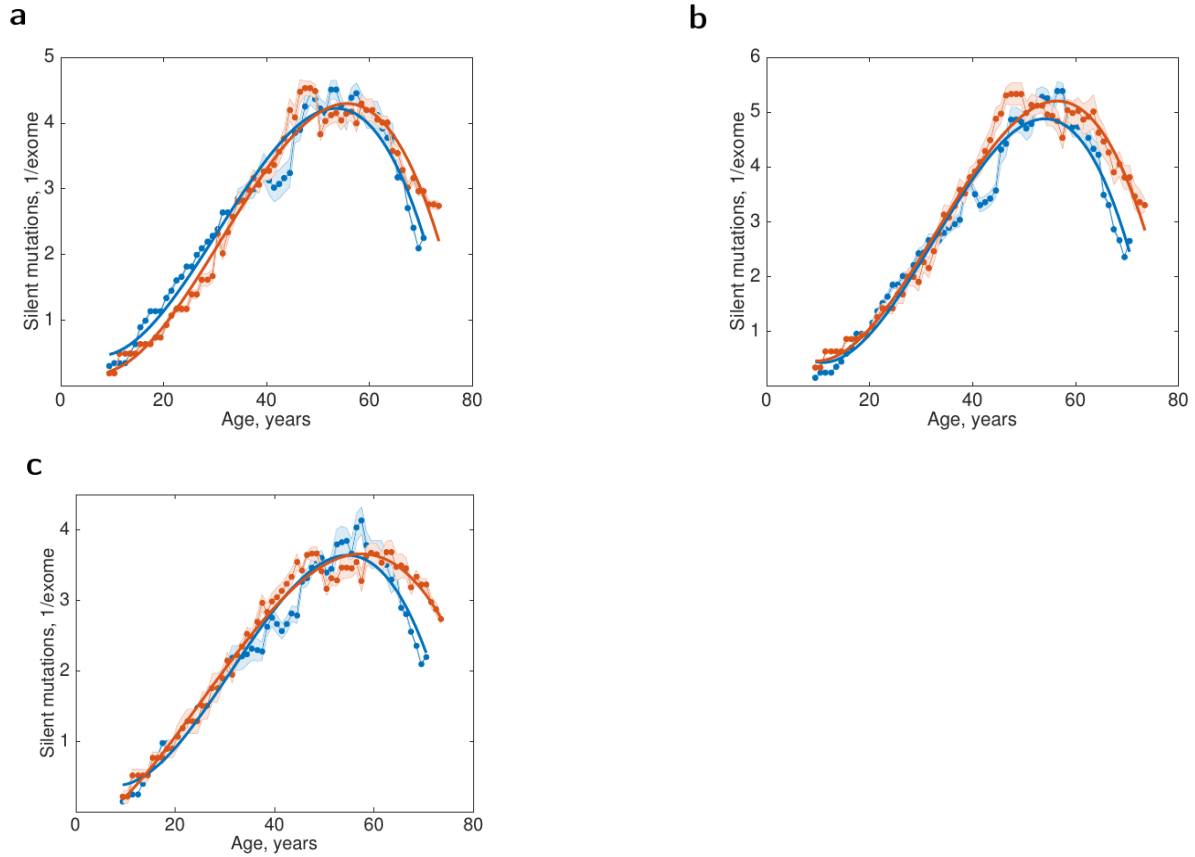

**Supplementary Figure 16** | Characteristic somatic mutation load in pheochromocytoma and paraganglioma (PCPG), silent mutations only. Men (blue) vs. women (red). **a.** BCM, IlluminaGA DNaseq, automated pipeline. **b.** BI, IlluminaGA DNaseq, automated pipeline. **c.** UCSC, IlluminaGA DNaseq, automated pipeline.

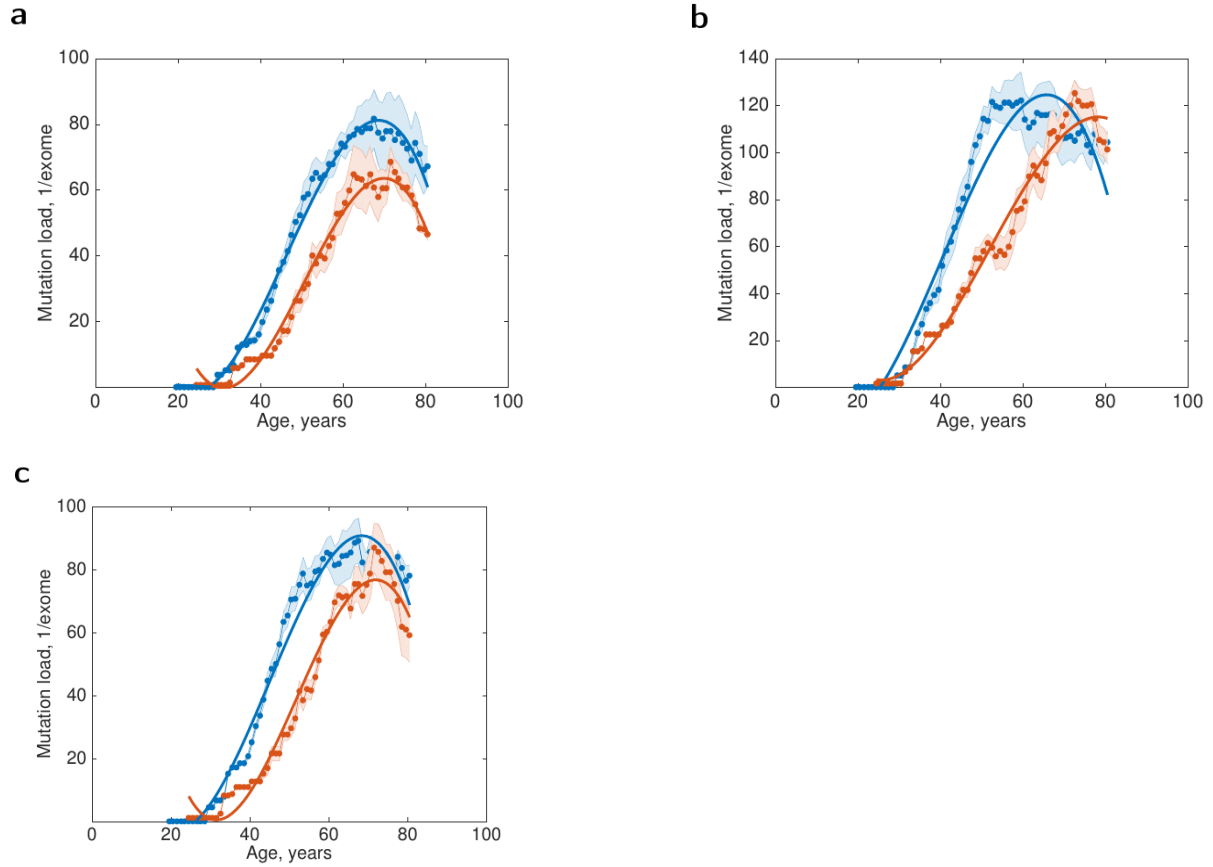

**Supplementary Figure 17** | Characteristic somatic mutation load in stomach adenocarcinoma (STAD), all mutations. Men (blue) vs. women (red). **a.** BCM, IlluminaGA DNaseq, automated pipeline. **b.** BI, IlluminaGA DNaseq, automated pipeline. **c.** BI, IlluminaGA DNaseq, curated pipeline.

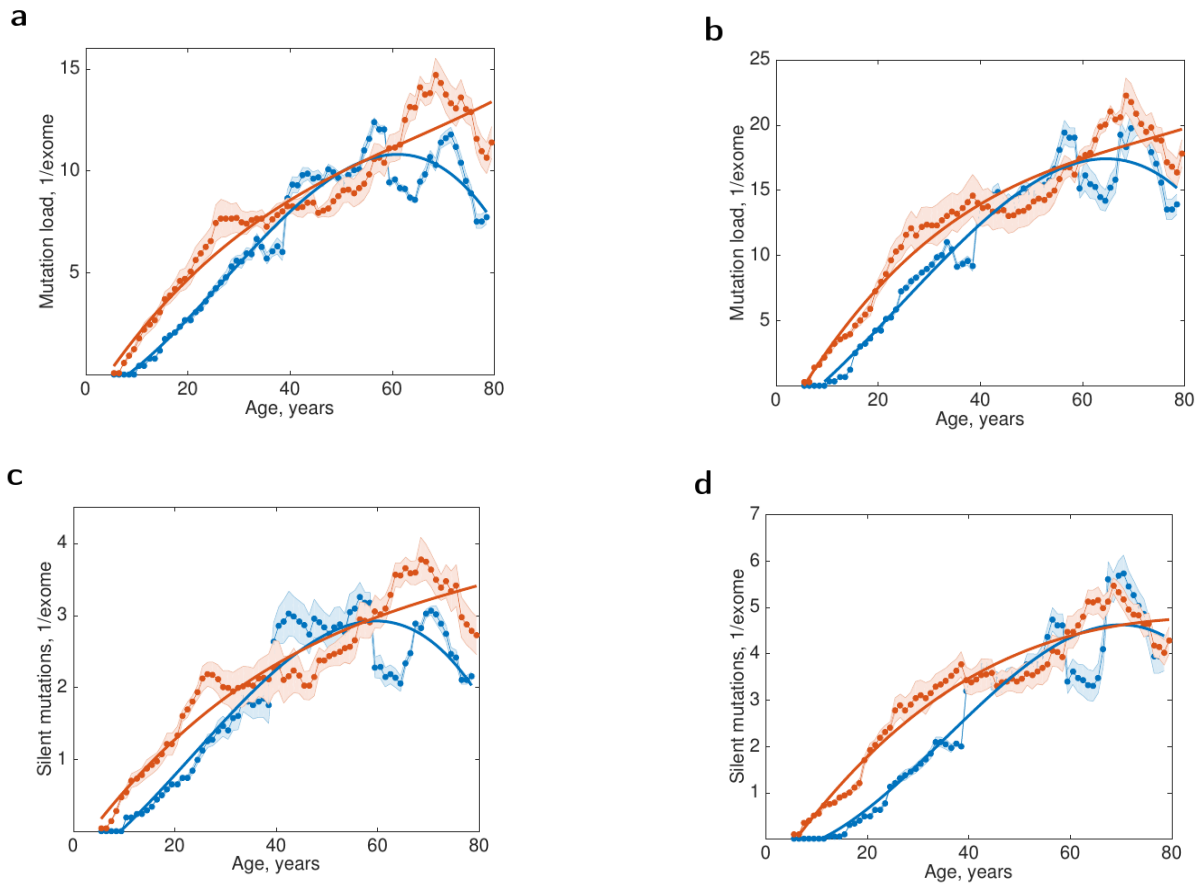

**Supplementary Figure 18** | Characteristic somatic mutation load in thyroid carcinoma (THCA). Men (blue) vs. women (red). **a.** BCM, IlluminaGA DNaseq, automated pipeline, all mutations. **b.** BI, IlluminaGA DNaseq, all mutations. **c.** BCM, IlluminaGA DNaseq, automated pipeline, silent mutations only. **d.** BI, IlluminaGA DNaseq, silent mutations only.



**Characteristic somatic mutation load vs. cancer incidence**

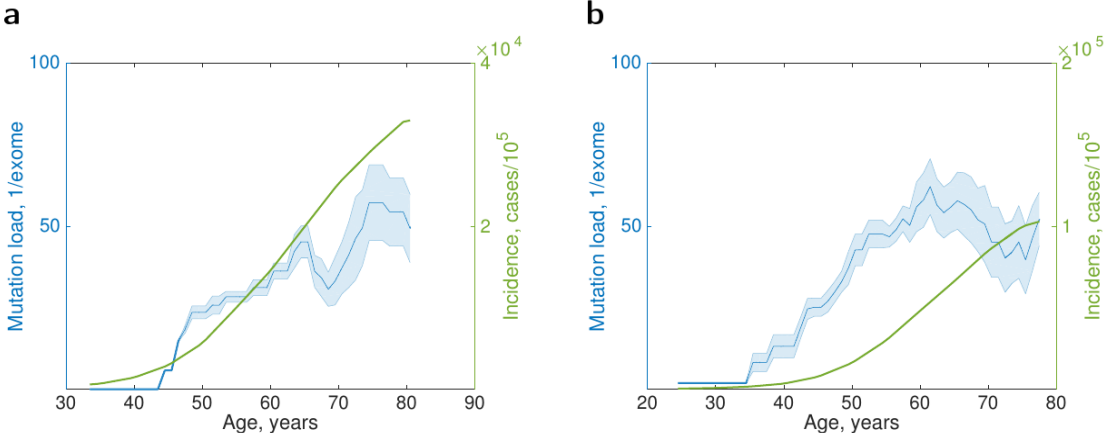

**Supplementary Figure 19** | Characteristic somatic mutation load vs. cancer incidence in bladder urothelial carcinoma (BLCA). **a.** Women, BI, IlluminaGA DNaseq, curated pipeline. **b.** Men, BI, IlluminaGA DNaseq, curated pipeline.

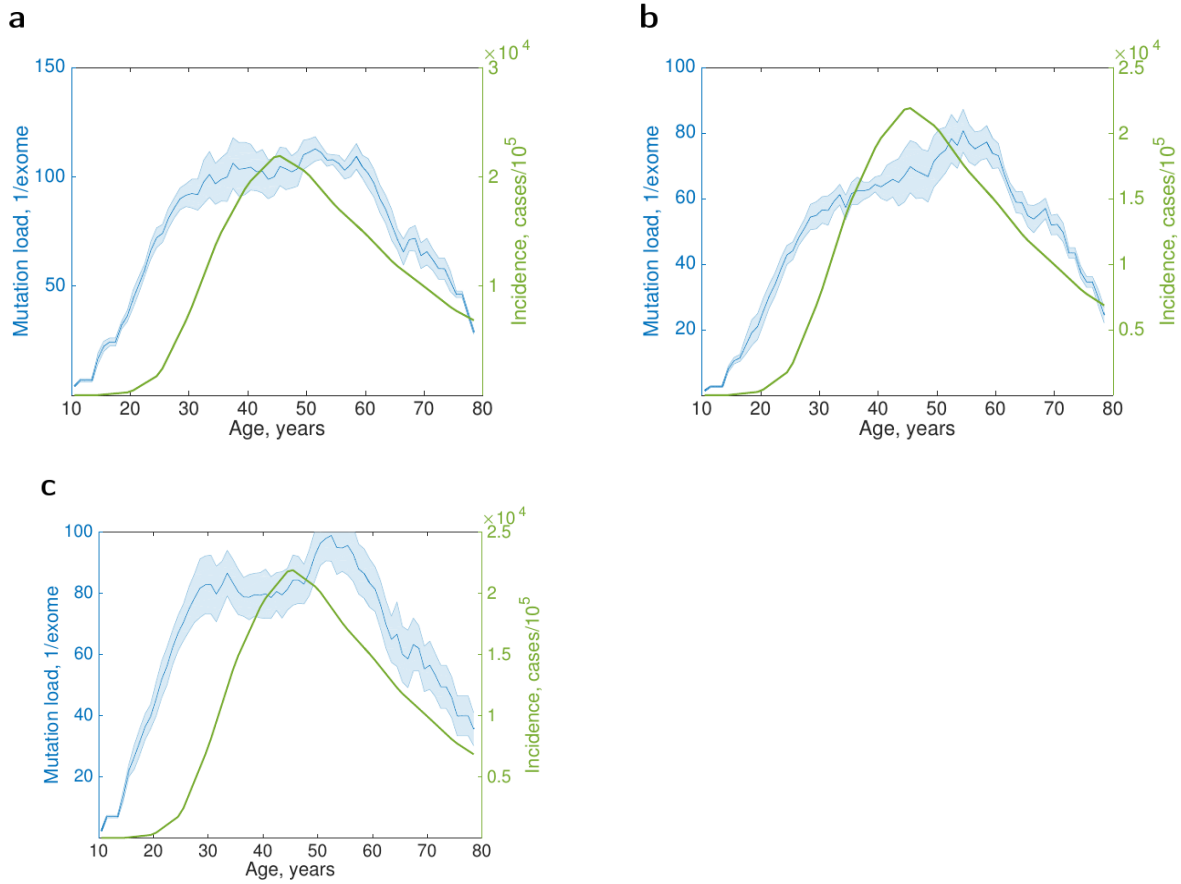

**Supplementary Figure 20** | Characteristic somatic mutation load vs. cancer incidence in cervical squamous cell carcinoma and endocervical adenocarcinoma (CESC). **a.** BCGSC, IlluminaHiSeq, automated pipeline. **b.** UCSC, IlluminaGA, automated pipeline. **c.** WUSM, IlluminaGA, curated pipeline.

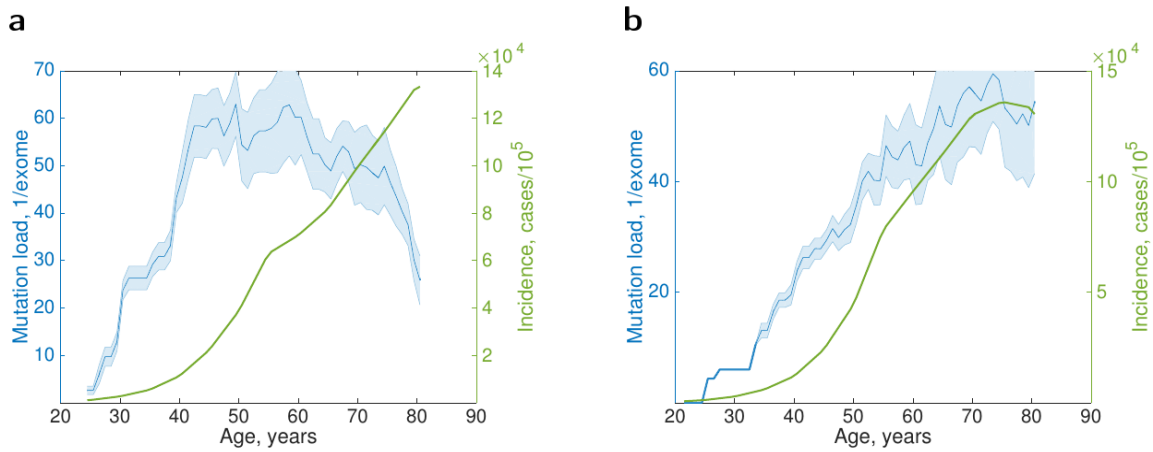

**Supplementary Figure 21** | Characteristic somatic mutation load vs. cancer incidence in colon adenocarcinoma (COAD). **a.** Women, BCM, IlluminaGA. **b.** Men, BCM, IlluminaGA.

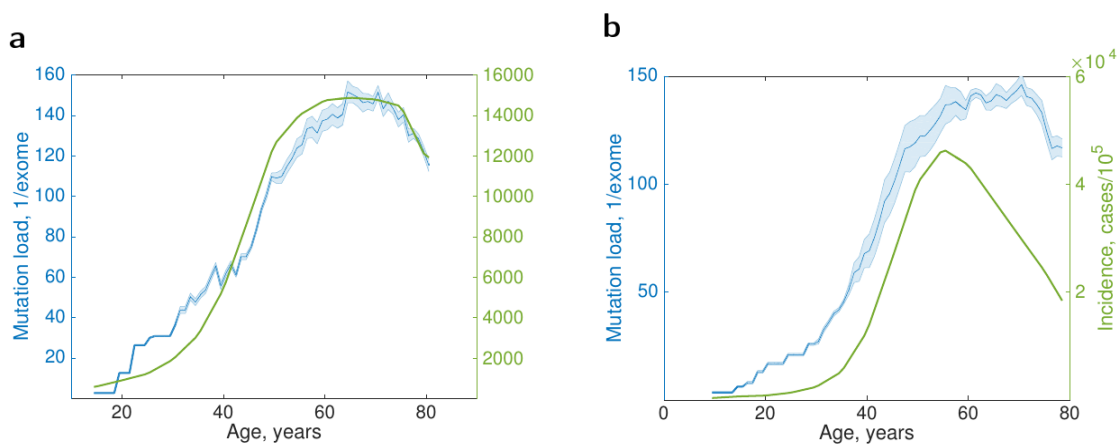

**Supplementary Figure 22** | Characteristic somatic mutation load vs. cancer incidence in head and neck squamous cell carcinoma (HNSC). **a.** Women, BI, IlluminaGA, automated pipeline. **b.** Men, BI, IlluminaGA, automated pipeline.

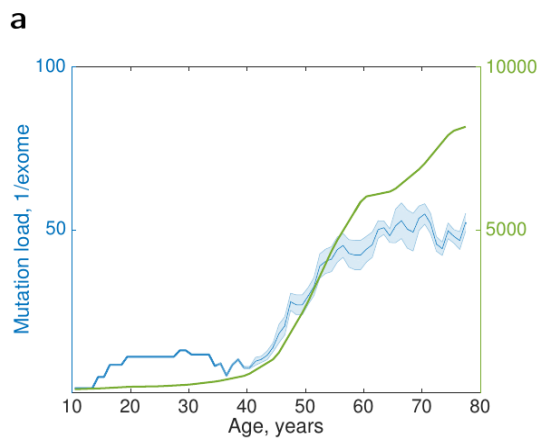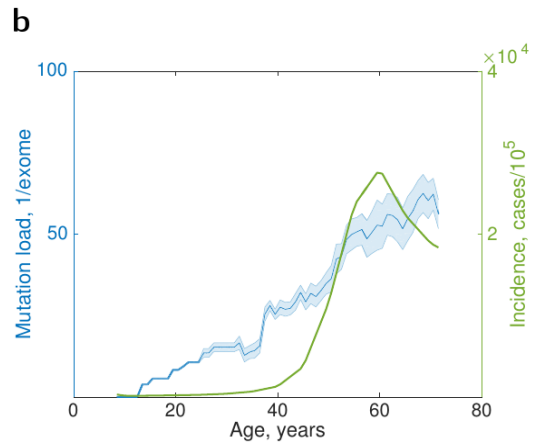

**Supplementary Figure 23** | Characteristic somatic mutation load vs. cancer incidence in liver hepatocellular carcinoma (LIHC). **a.** Women, BCM, IlluminaGA, automated pipeline. **b.** Men, BCM, IlluminaGA, automated pipeline.

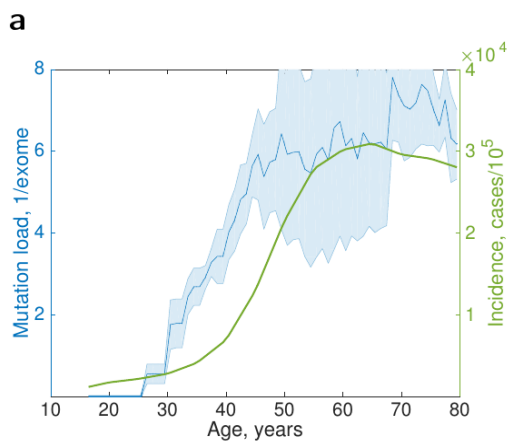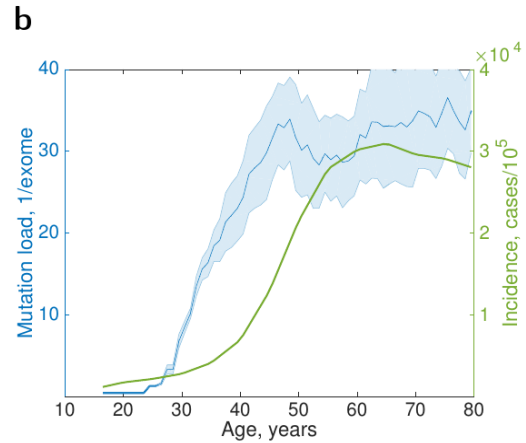

**Supplementary Figure 24** | Characteristic somatic mutation load vs. cancer incidence in ovarian serous cystadenocarcinoma (OV). **a.** BCM, SOLiD, curated pipeline. **b.** WUSM, IlluminaGA.

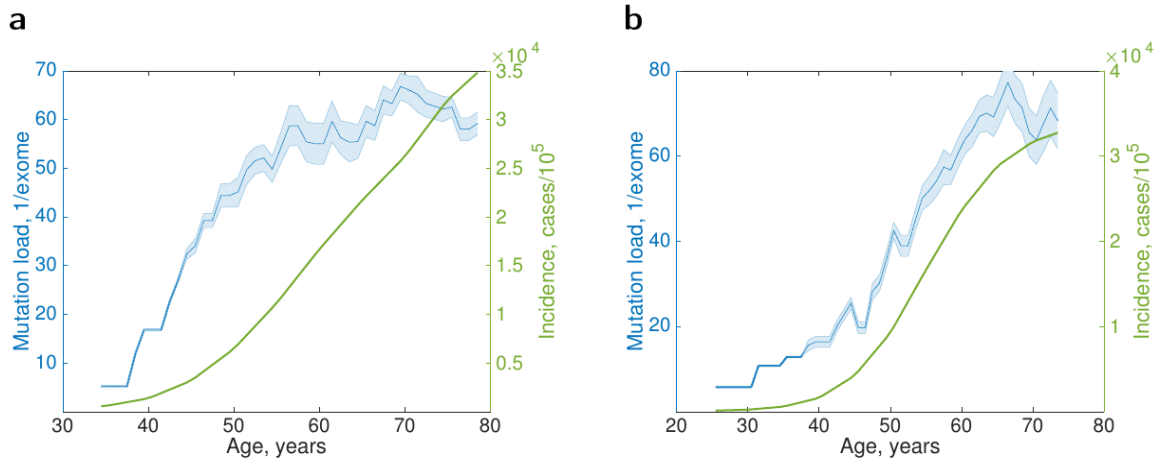

**Supplementary Figure 25** | Characteristic somatic mutation load vs. cancer incidence in pancreatic adenocarcinoma (PAAD). **a.** Women, BCM, IlluminaGA, automated pipeline. **b.** Men, BCM, IlluminaGA, automated pipeline.

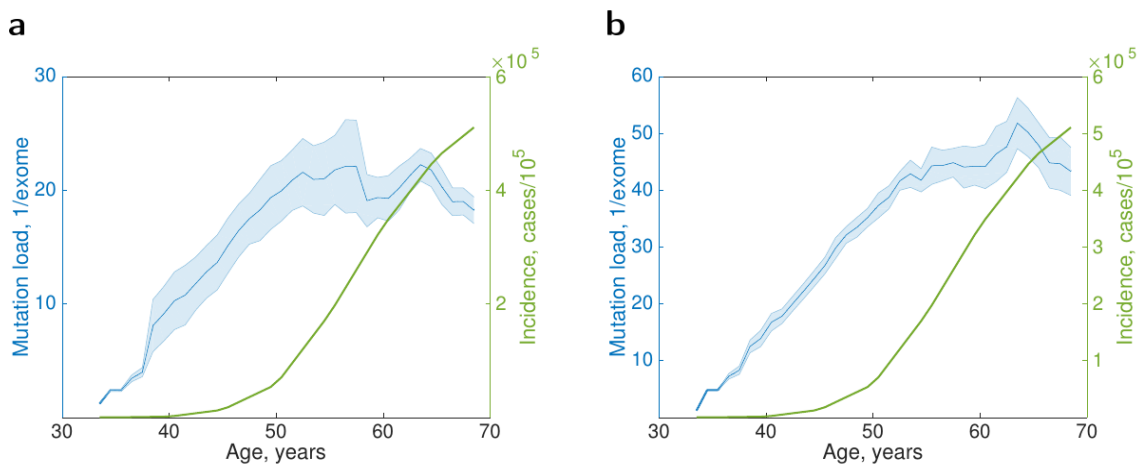

**Supplementary Figure 26** | Characteristic somatic mutation load vs. cancer incidence in prostate adenocarcinoma (PRAD). **a.** BCM, IlluminaGA, automated pipeline. **b.** BI, IlluminaGA, automated pipeline.

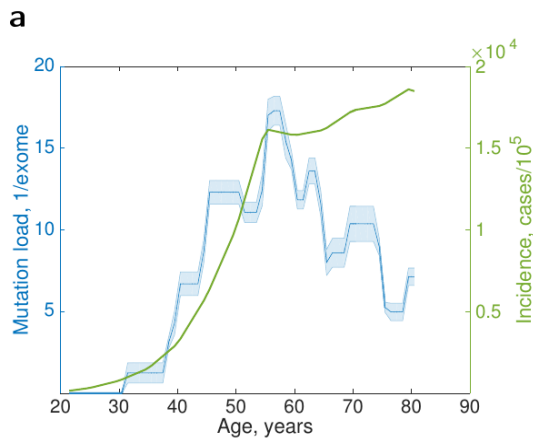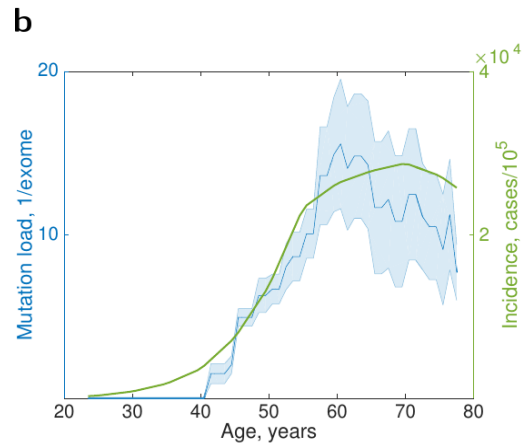

**Supplementary Figure 27** | Characteristic somatic mutation load vs. cancer incidence in rectum adenocarcinoma (READ). **a.** Women, BCM, SOLiD. **b.** Men, BCM, SOLiD.

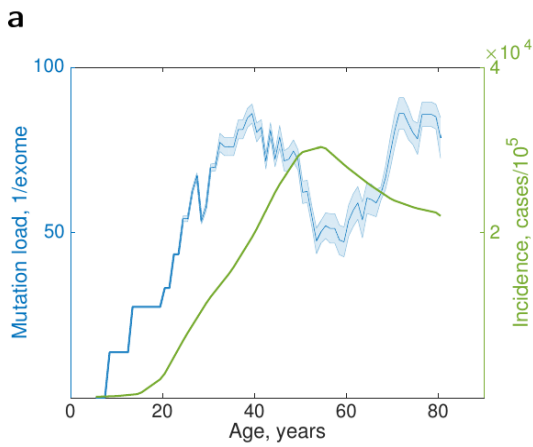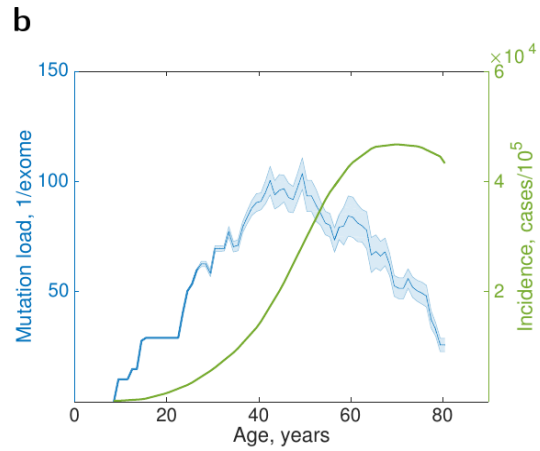

**Supplementary Figure 28** | Characteristic somatic mutation load vs. cancer incidence in skin cutaneous melanoma (SKCM). **a.** Women, BCM, IlluminaGA, automated pipeline. **b.** Men, BCM, IlluminaGA, automated pipeline.

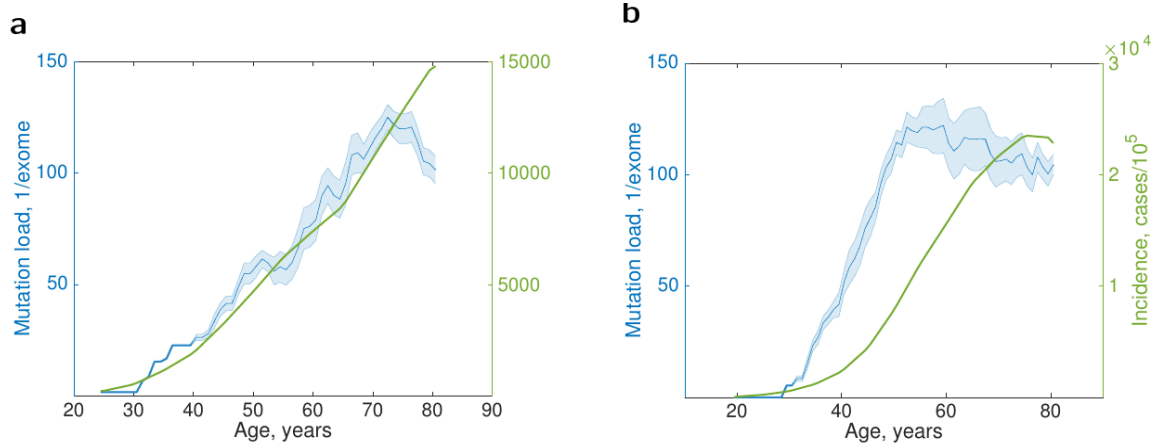

**Supplementary Figure 29** | Characteristic somatic mutation load vs. cancer incidence in stomach adenocarcinoma (STAD). **a.** Women, BI, IlluminaGA, automated pipeline. **b.** Men, BI, IlluminaGA, automated pipeline.

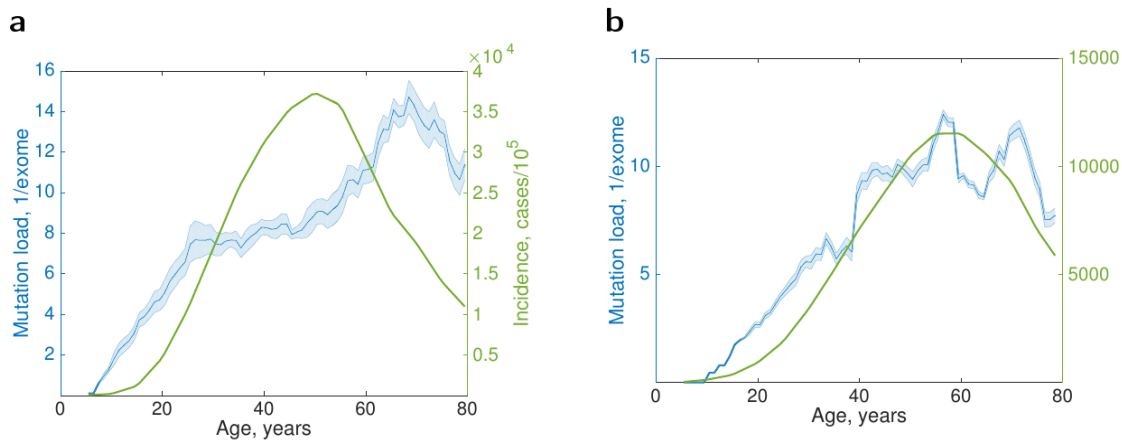

**Supplementary Figure 30** | Characteristic somatic mutation load vs. cancer incidence in thyroid carcinoma (THCA). **a.** Women, BCM, IlluminaGA, automated pipeline. **b.** Men, BCM, IlluminaGA, automated pipeline.

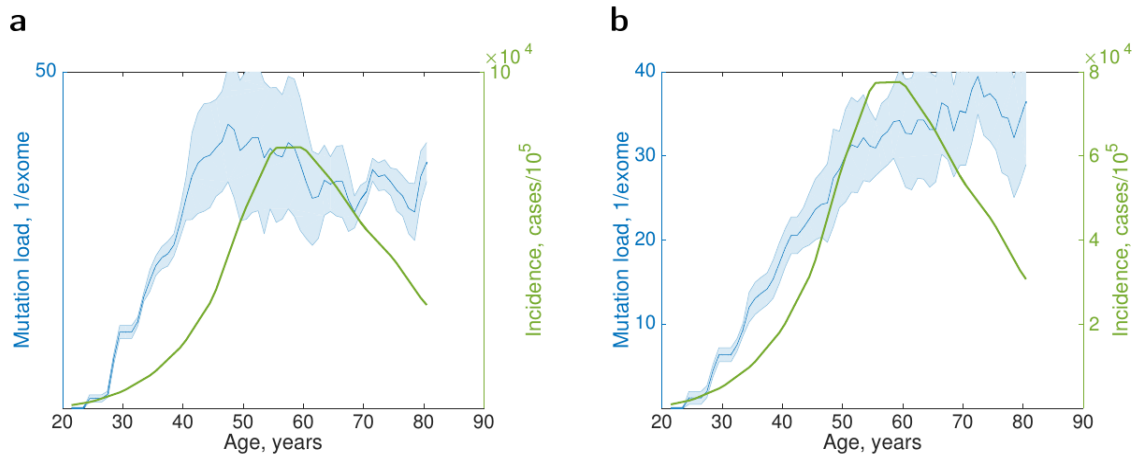

**Supplementary Figure 31** | Characteristic somatic mutation load vs. cancer incidence in uterine corpus endometrial carcinoma (UCEC). **a.** BI, IlluminaGA. **b.** WUSM, IlluminaGA.



## Growth of cancer incidence with age in different countries

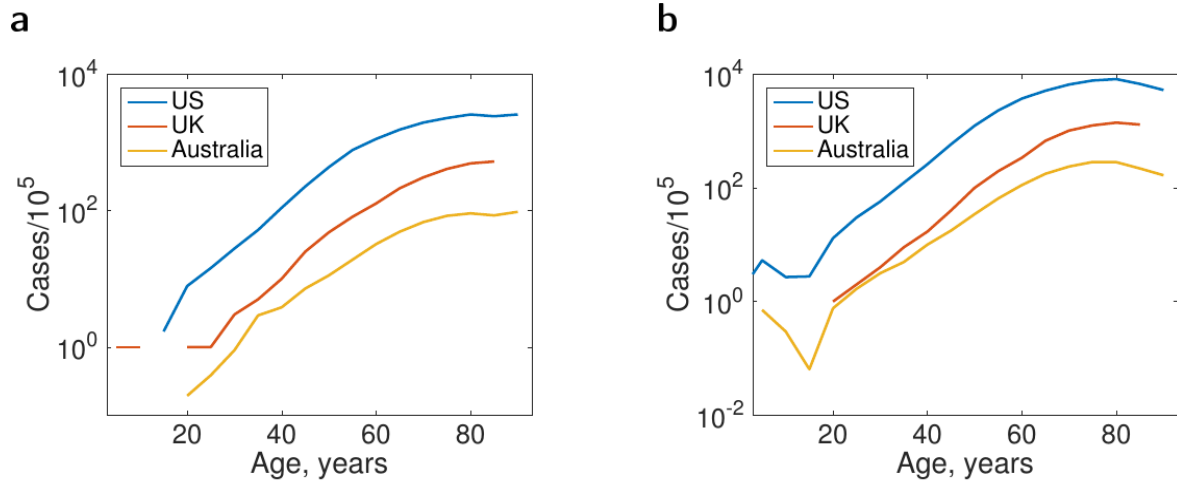

**Supplementary Figure 32** | Incidence of bladder cancer in US, UK and Australia, semilog scale.

**a.** In women. **b.** In men.

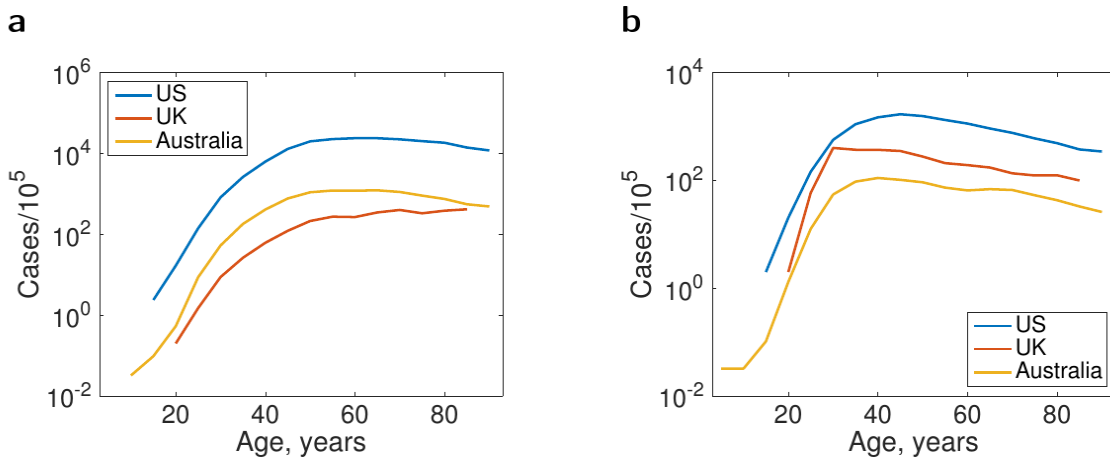

**Supplementary Figure 33** | Incidence of breast and cervical cancer in US, UK and Australia, semilog scale.

**a.** Breast cancer. **b.** Cervical cancer.

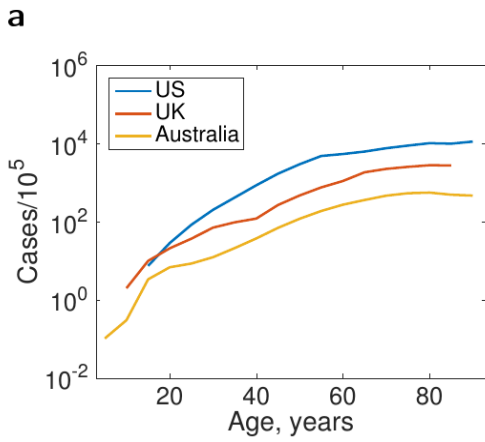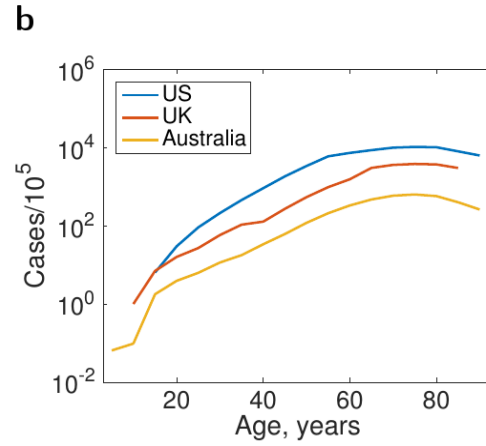

**Supplementary Figure 34** | Incidence of colon cancer in US, UK and Australia, semilog scale. **a.** In women. **b.** In men.

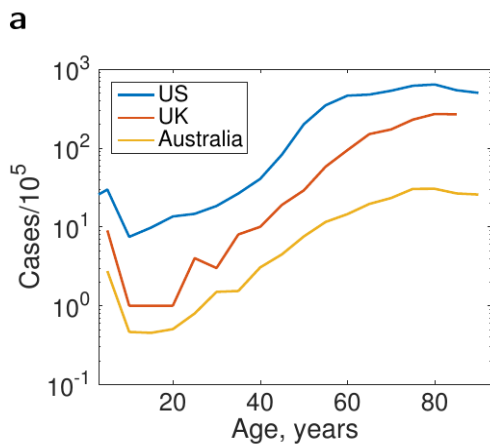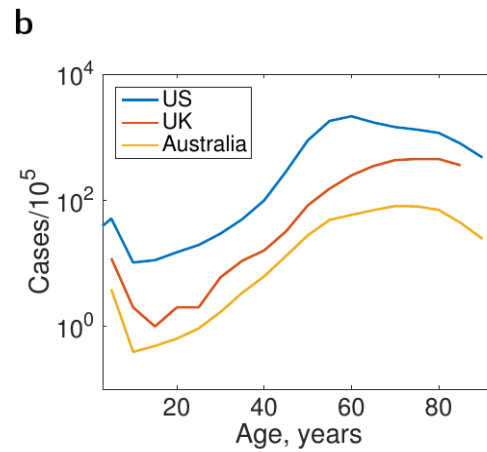

**Supplementary Figure 35** | Incidence of liver cancer in US, UK and Australia, semilog scale. **a.** In women. **b.** In men.

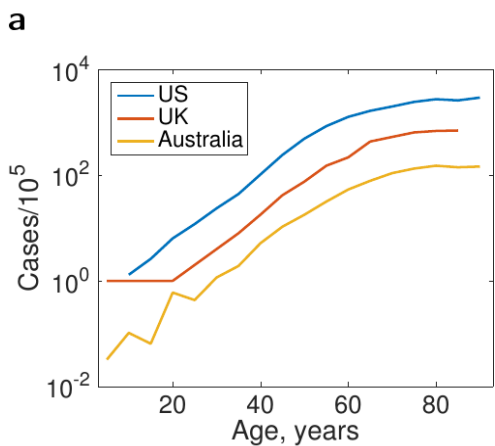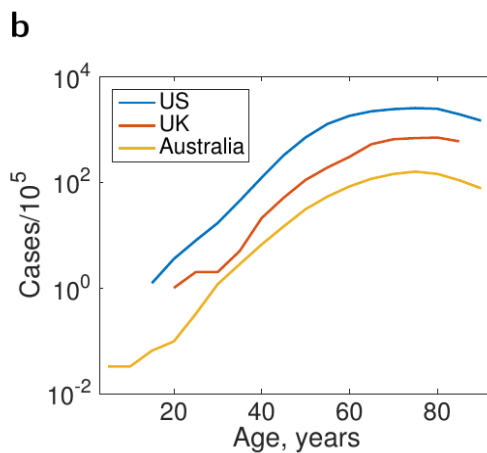

**Supplementary Figure 36** | Incidence of pancreatic cancer in US, UK and Australia, semilog scale. **a.** In women. **b.** In men.

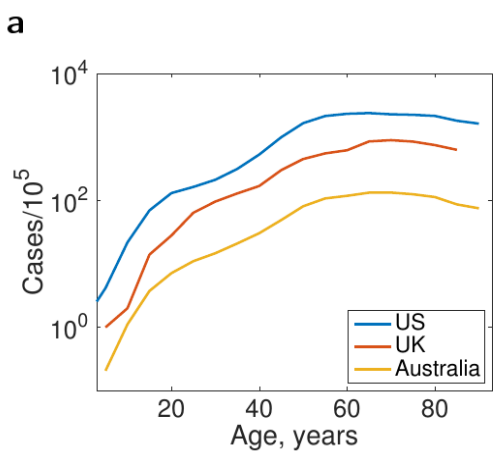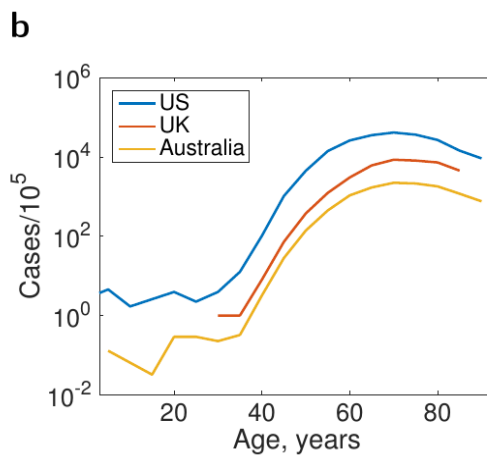

**Supplementary Figure 37** | Incidence of ovarian and prostate cancer in US, UK and Australia, semilog scale. **a.** Ovarian cancer. **b.** Prostate cancer.

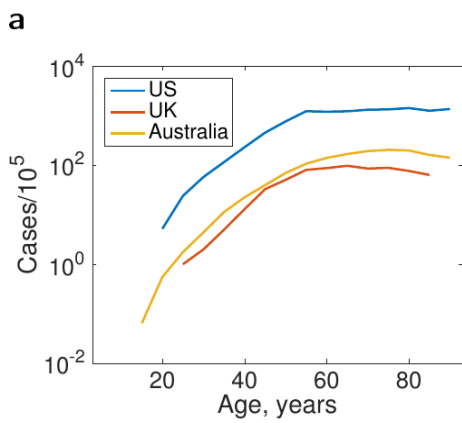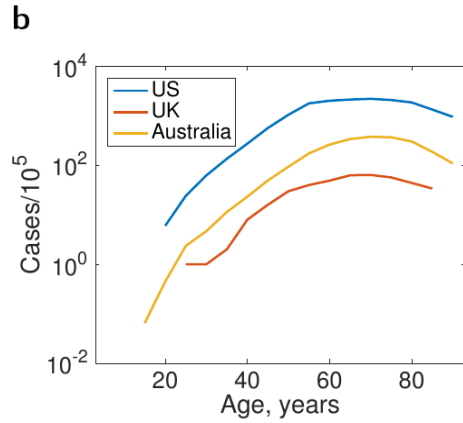

**Supplementary Figure 38** | Incidence of rectal cancer in US, UK and Australia, semilog scale. **a.** In women. **b.** In men.

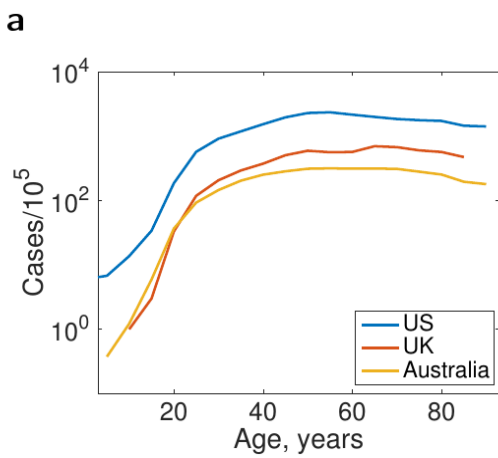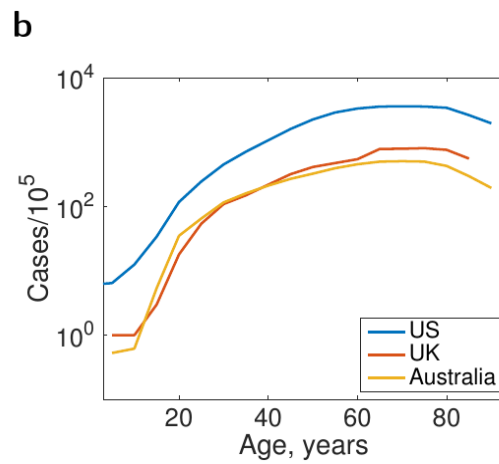

**Supplementary Figure 39** | Incidence of skin melanoma in US, UK and Australia, semilog scale. **a.** In women. **b.** In men.

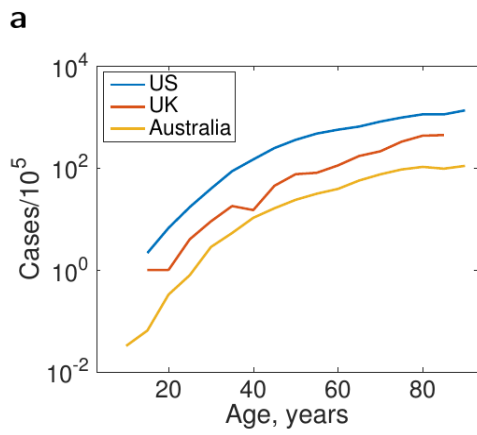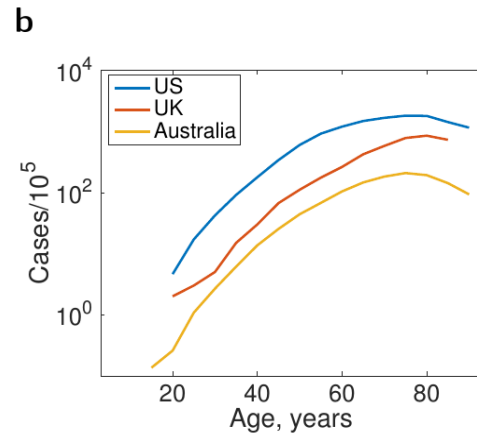

**Supplementary Figure 40** | Incidence of stomach melanoma in US, UK and Australia, semilog scale. **a.** In women. **b.** In men.

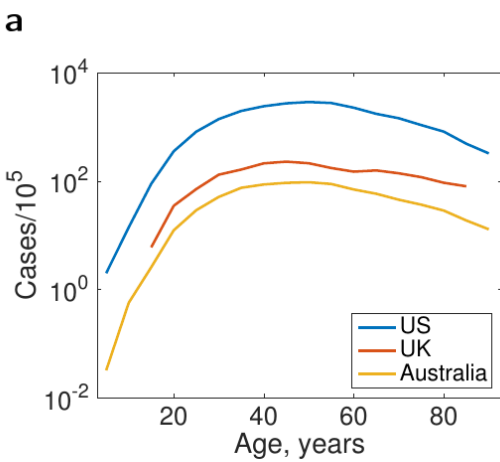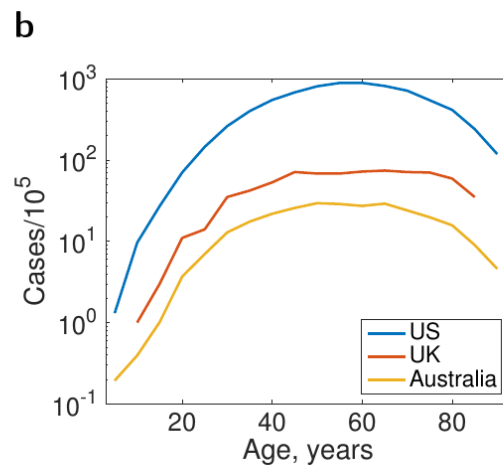

**Supplementary Figure 41** | Incidence of thyroid cancer in US, UK and Australia, semilog scale. **a.** In women. **b.** In men.

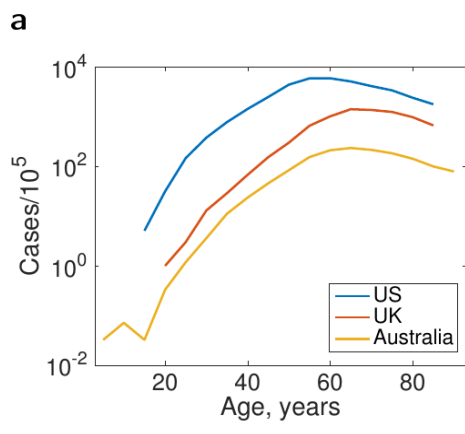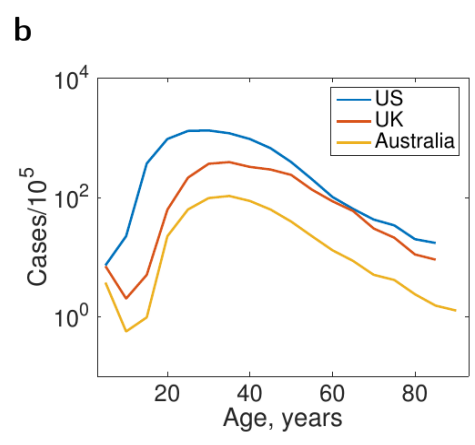

**Supplementary Figure 42** | Incidence of uterine and testicular cancer in US, UK and Australia, semilog scale. **a.** Uterine cancer. **b.** Testicular cancer.

# Mutation counting in whole genomes

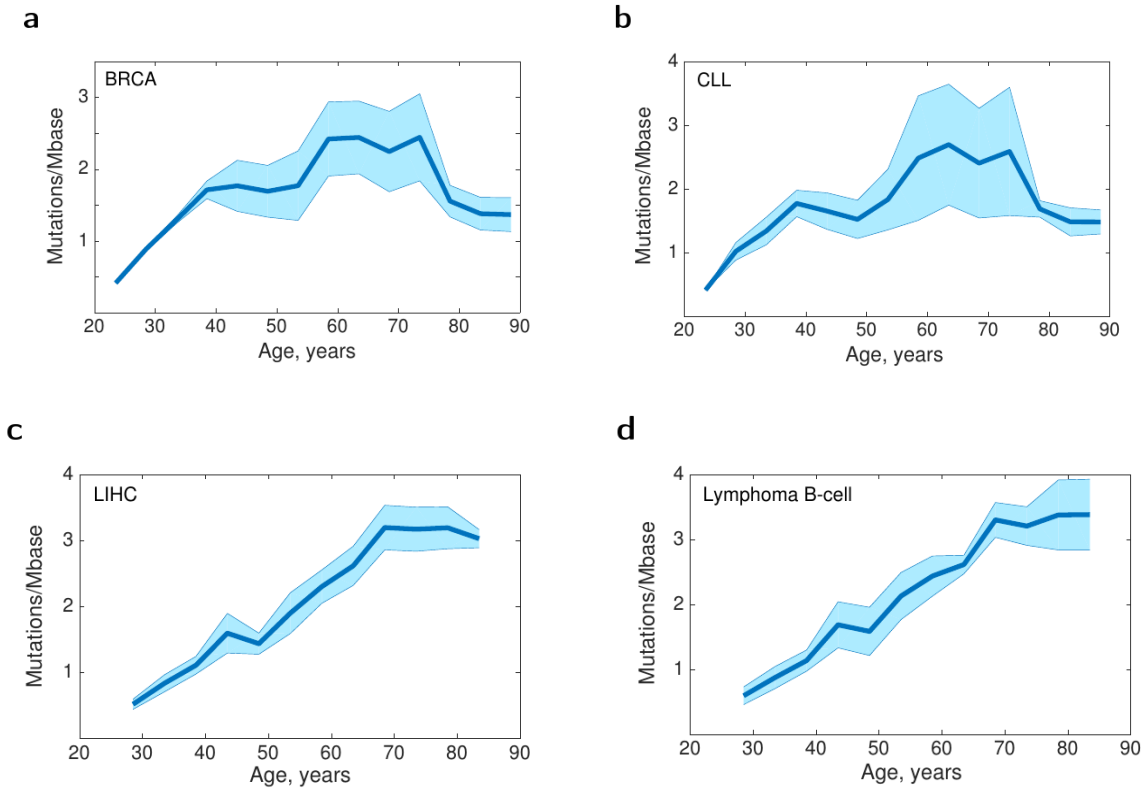

**Supplementary Figure 43** | Behavior of mutational load with age in whole genomes. **a.** Breast invasive carcinoma. **b.** Chronic lymphocytic leukemia. **c.** Liver hepatic carcinoma. **d.** B-cell lymphoma.

**a**

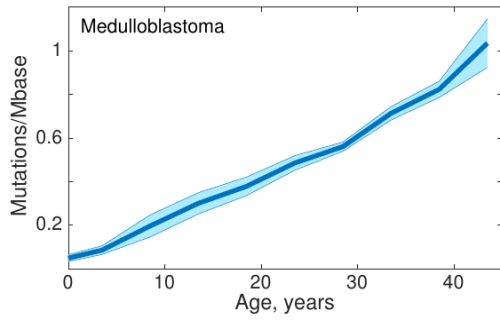

**b**

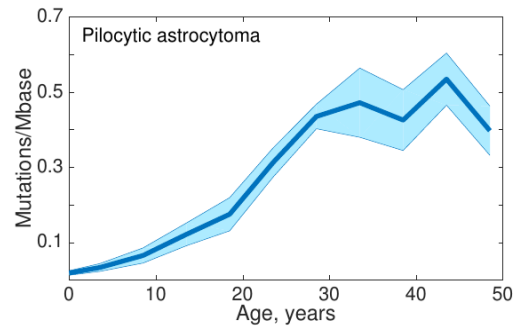

**Supplementary Figure 44** | Behavior of mutational load with age in whole genomes. **a.** Medulloblastoma. **b.** Pilocytic astrocytoma.



## Examples of chronological age distributions for samples covered by TCGA

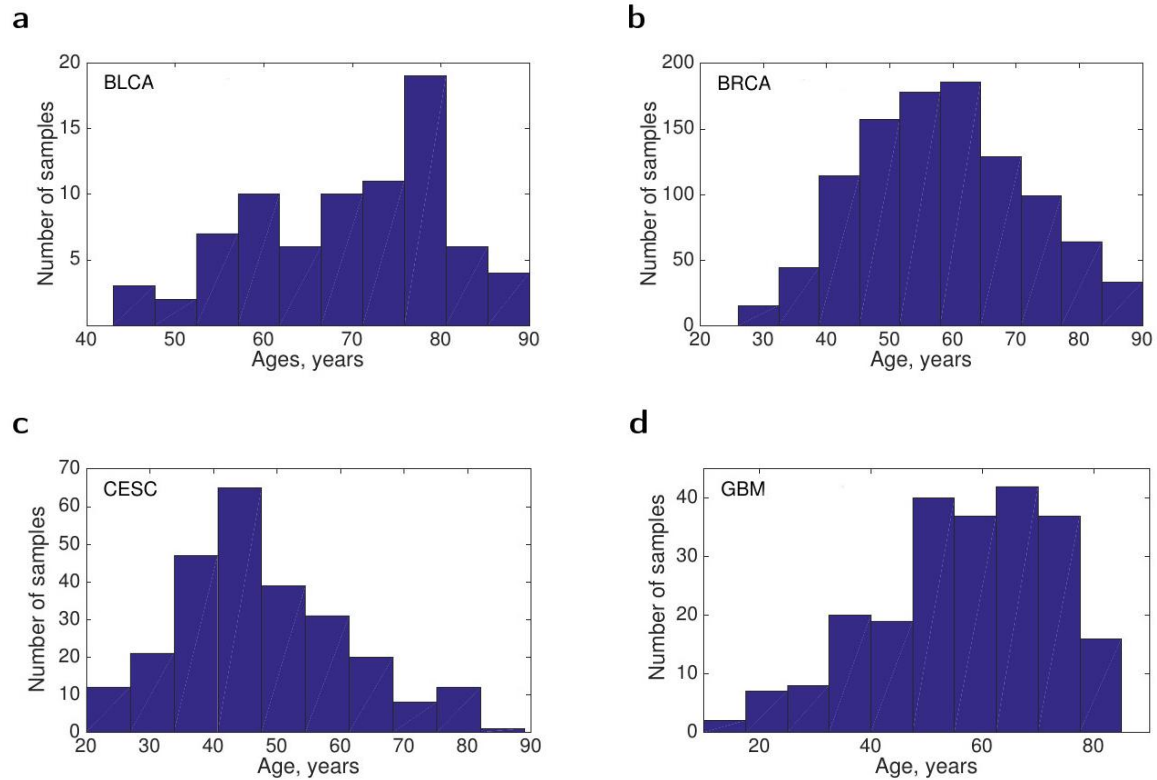

**Supplementary Figure 45** | Chronological age distributions for samples covered by TCGA atlas, women. **a.** Bladder adenocarcinoma, BI, automated pipeline. **b.** Breast invasive carcinoma, WUSM, curated pipeline. **c.** Cervical squamous cell carcinoma, BSGSC, IlluminaHiSeq, automated pipeline. **d.** Glioblastoma, BI, Illumina pipeline.

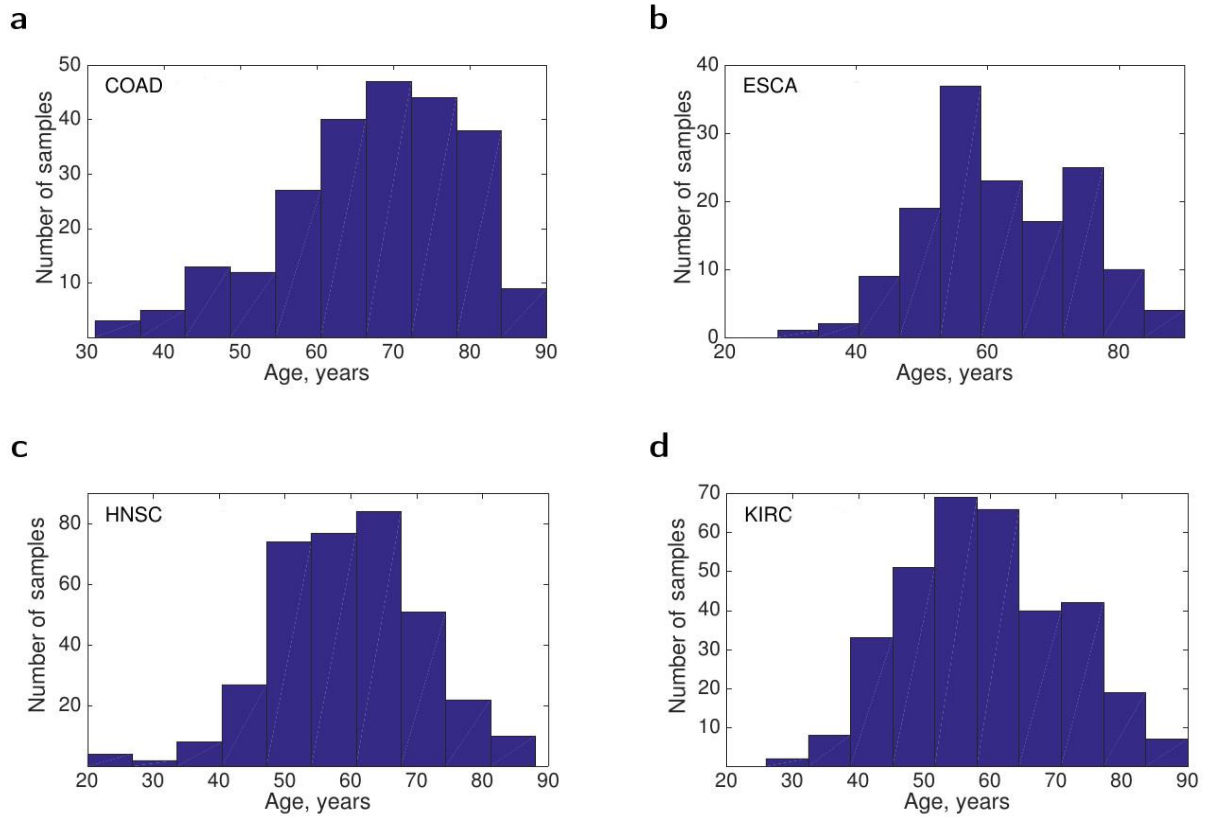

**Supplementary Figure 46** | Chronological age distributions for samples covered by TCGA atlas, men. **a.** Colon adenocarcinoma, BCM, IlluminaGA. **b.** Esophageal adenocarcinoma, BCGSC, IlluminaHiSeq, automated pipeline. **c.** Head and neck squamous cell carcinoma. BI, IlluminaGA. **d.** Kidney renal clear cell carcinoma, BI, Illumina, automated pipeline.

## Relative weights of different indels and SNVs in the age-correlated somatic mutation load pattern

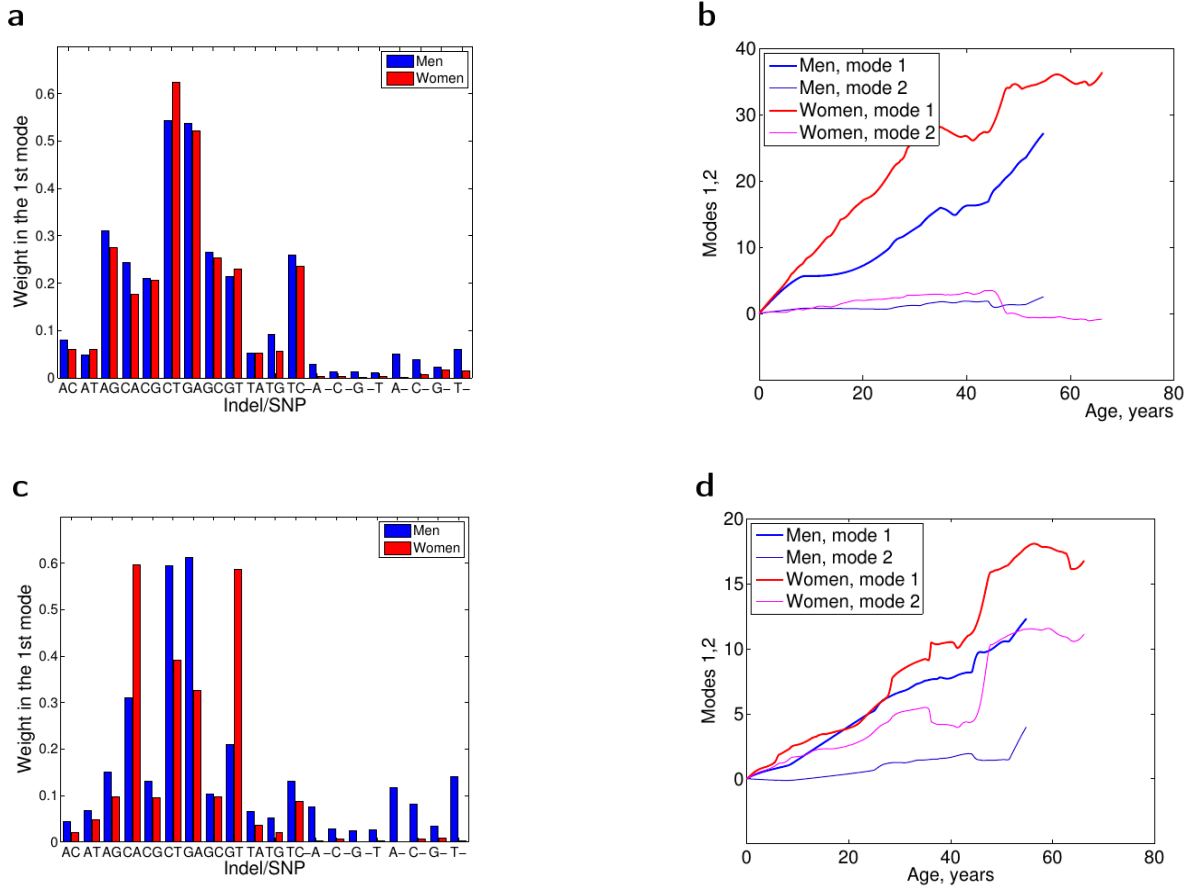

**Supplementary Figure 47** | Modal structure of somatic mutation load in adrenocortical carcinoma (ACC). **a.** BCM, IlluminaGA DNaseq, automated pipeline; relative weights of different SNVs and indels. **b.** BCM, IlluminaGA DNaseq, automated pipeline; count estimation using projection on the leading pattern. **c.** BCM, IlluminaGA DNaseq, curated pipeline relative weights of different SNVs and indels. **d.** BCM, IlluminaGA DNaseq, automated pipeline; count estimation using projection on the leading pattern.

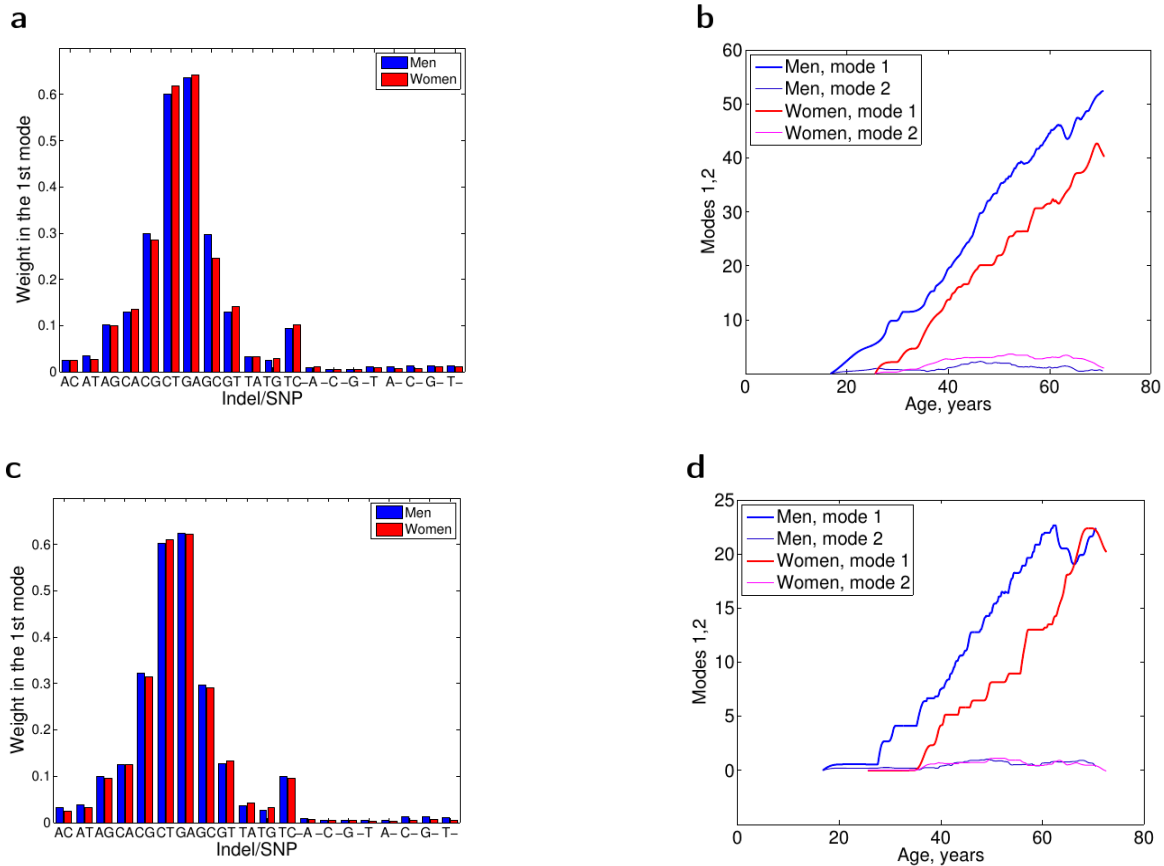

**Supplementary Figure 48** | Modal structure of somatic mutation load in bladder urothelial carcinoma (BLCA). **a.** BI, IlluminaGA DNaseq, automated pipeline; relative weights of different SNVs and indels. **b.** BI, IlluminaGA DNaseq, automated pipeline; count estimation using projection on the leading pattern. **c.** BI, IlluminaGA DNaseq, curated pipeline; relative weights of different SNVs and indels. **d.** BI, IlluminaGA DNaseq, curated pipeline; count estimation using projection on the leading pattern.

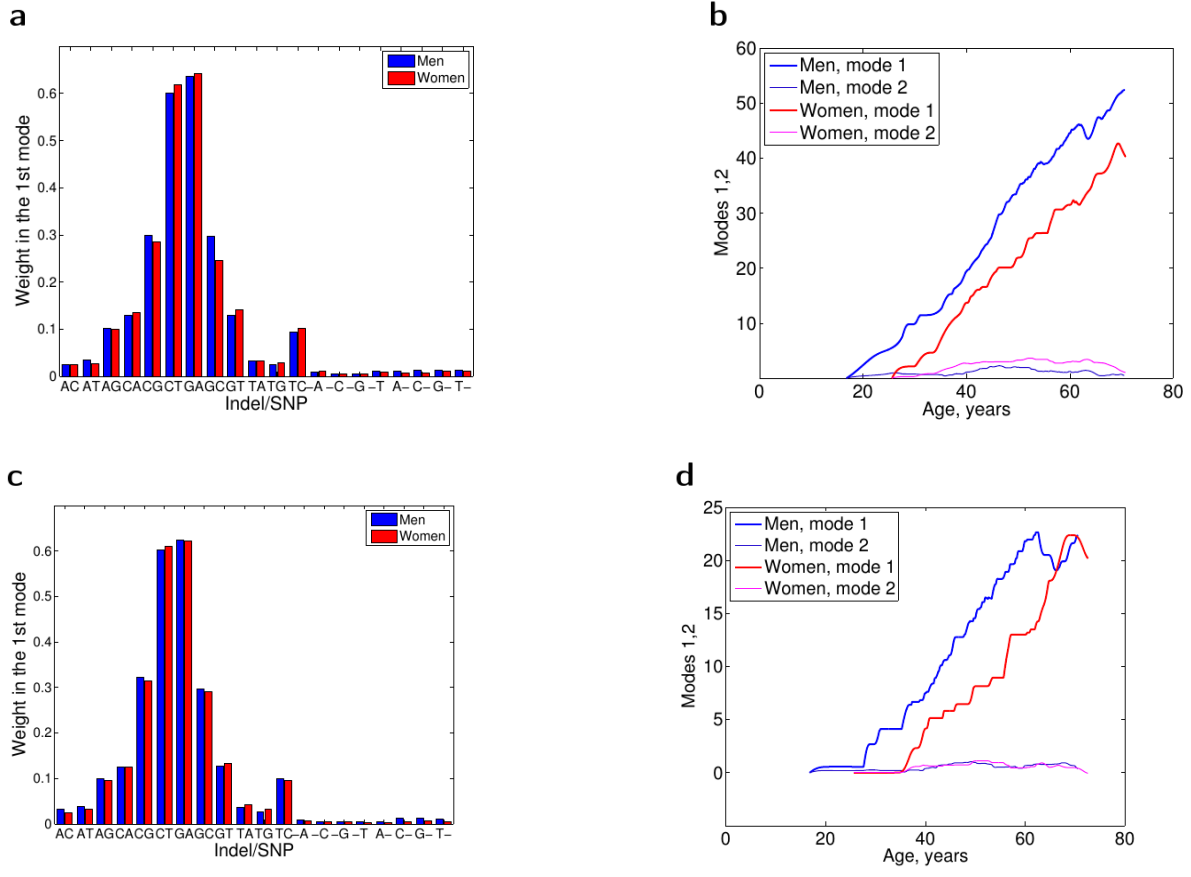

**Supplementary Figure 49** | Modal structure of somatic mutation load in breast invasive carcinoma (BRCA). **a.** WUSM, IlluminaGA DNaseq, curated pipeline; relative weights of different SNVs and indels. **b.** WUSM, IlluminaGA DNaseq, curated pipeline; count estimation using projection on the leading pattern. **c.** WUSM, IlluminaGA DNaseq; relative weights of different SNVs and indels. **d.** WUSM, IlluminaGA DNaseq; count estimation using projection on the leading pattern.

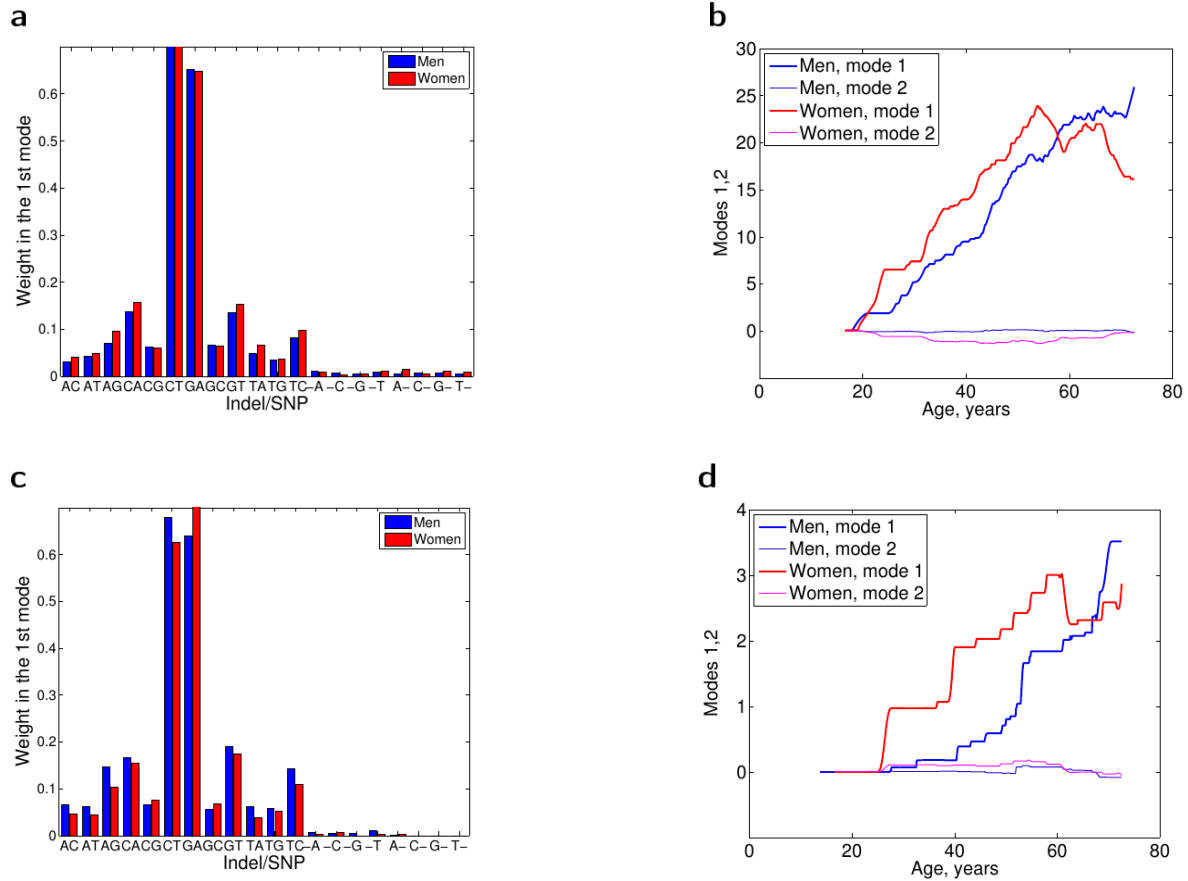

**Supplementary Figure 50** | Modal structure of somatic mutation load in colon adenocarcinoma (COAD). **a.** BCM, IlluminaGA DNaseq; relative weights of different SNVs and indels. **b.** BCM, IlluminaGA DNaseq; count estimation using projection on the leading pattern. **c.** BCM, SOLiD DNaseq; relative weights of different SNVs and indels. **d.** BCM, SOLiD DNaseq; count estimation using projection on the leading pattern.

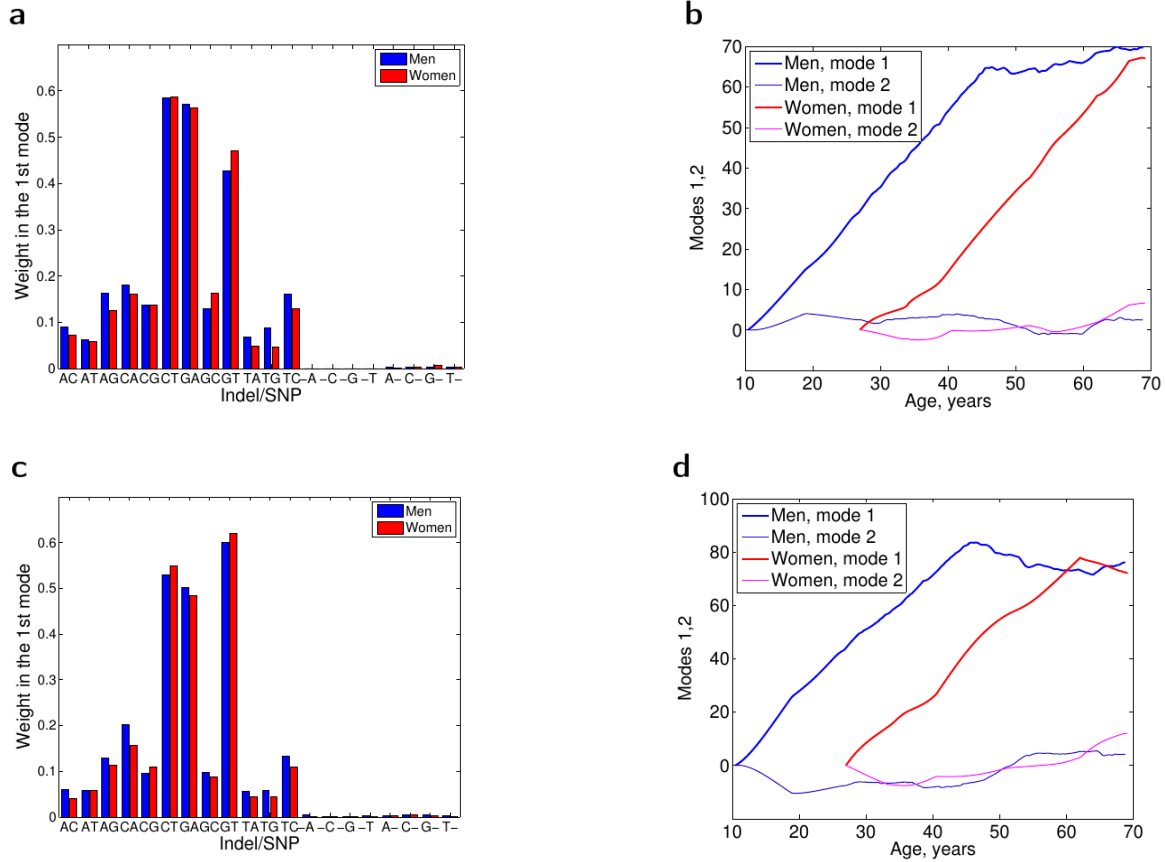

**Supplementary Figure 51** | Modal structure of somatic mutation load in esophageal carcinoma (ESCA). **a.** BCGSC, IlluminaHiSeq DNaseq, automated pipeline; relative weights of different SNVs and indels. **b.** BCGSC, IlluminaHiSeq DNaseq, automated pipeline; count estimation using projection on the leading pattern. **c.** BCM, IlluminaGA DNaseq, automated pipeline; relative weights of different SNVs and indels. **d.** BCM, IlluminaGA DNaseq, automated pipeline; count estimation using projection on the leading pattern.

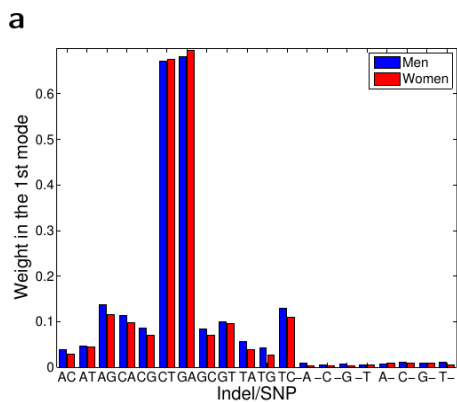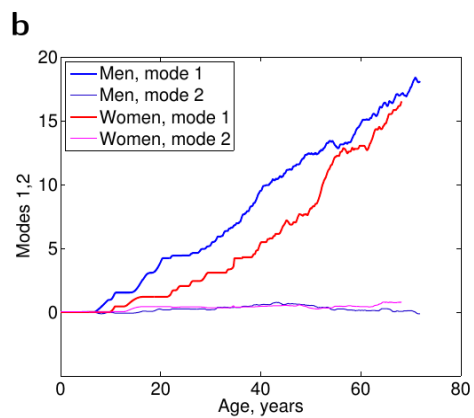

**Supplementary Figure 52** | Modal structure of somatic mutation load in glioblastoma multiforme (GBM). **a.** BI, IlluminaGA DNaseq; relative weights of different SNVs and indels. **b.** BI, IlluminaGA DNaseq; count estimation using projection on the leading pattern.



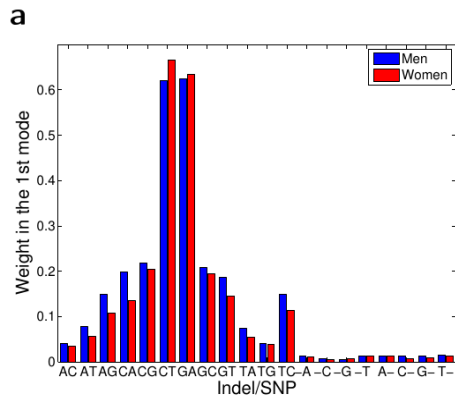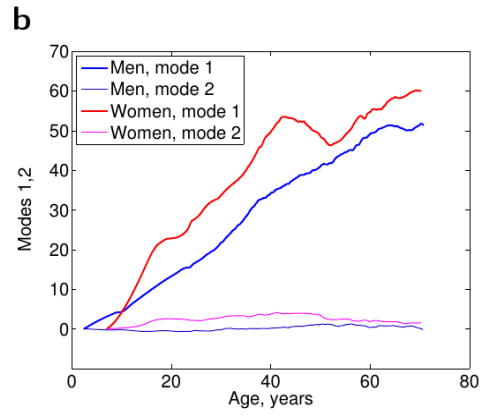

**Supplementary Figure 53** | Modal structure of somatic mutation load in head and neck squamous cell carcinoma (HNSC). **a.** BI, IlluminaGA DNaseq, automated pipeline; relative weights of different SNVs and indels. **b.** BI, IlluminaGA DNaseq, automated pipeline; count estimation using projection on the leading pattern.

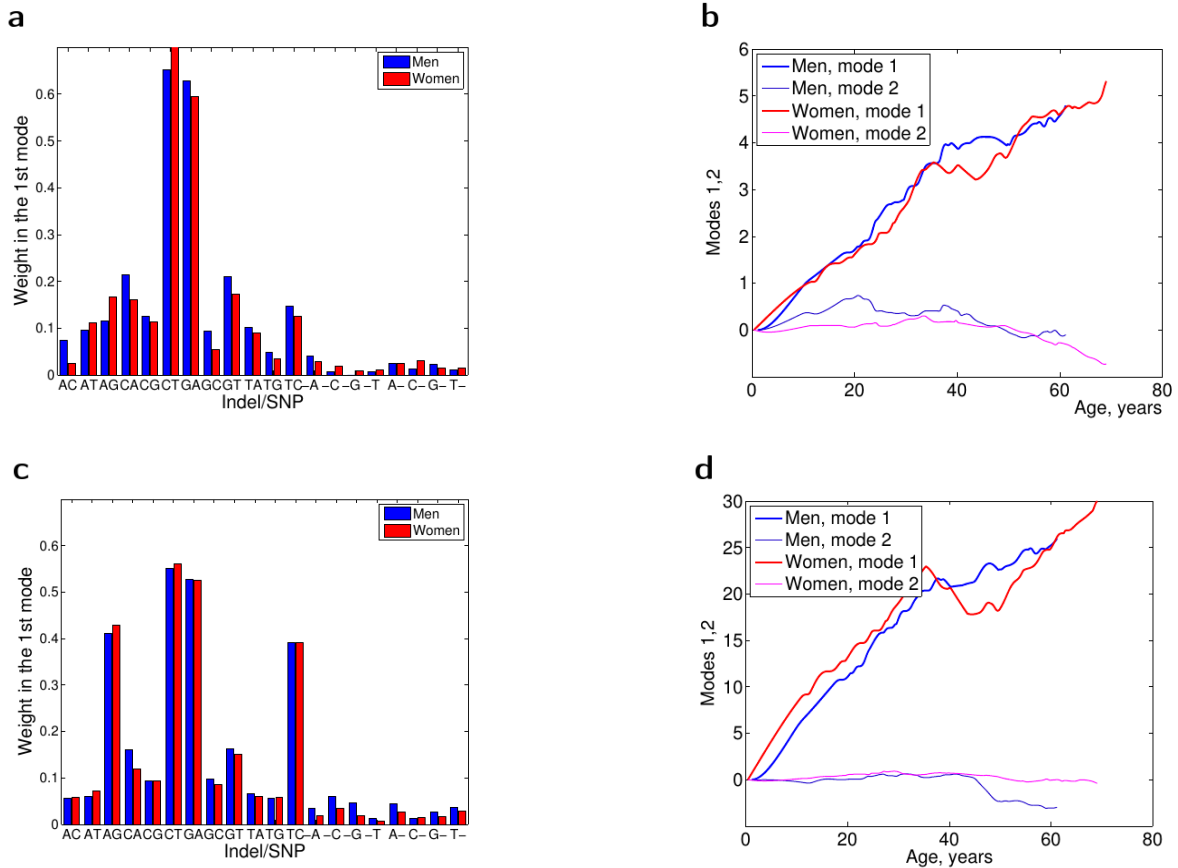

**Supplementary Figure 54** | Modal structure of somatic mutation load in kidney chromophobe (KICH). **a.** BCM, IlluminaGA DNaseSeq, automated pipeline; relative weights of different SNVs and indels. **b.** BCM, IlluminaGA DNaseSeq, automated pipeline; count estimation using projection on the leading pattern. **c.** BCM, mixed IlluminaGA and SOLiD, curated pipeline; relative weights of different SNVs and indels. **d.** BCM, mixed IlluminaGA and SOLiD, curated pipeline; count estimation using projection on the leading pattern.

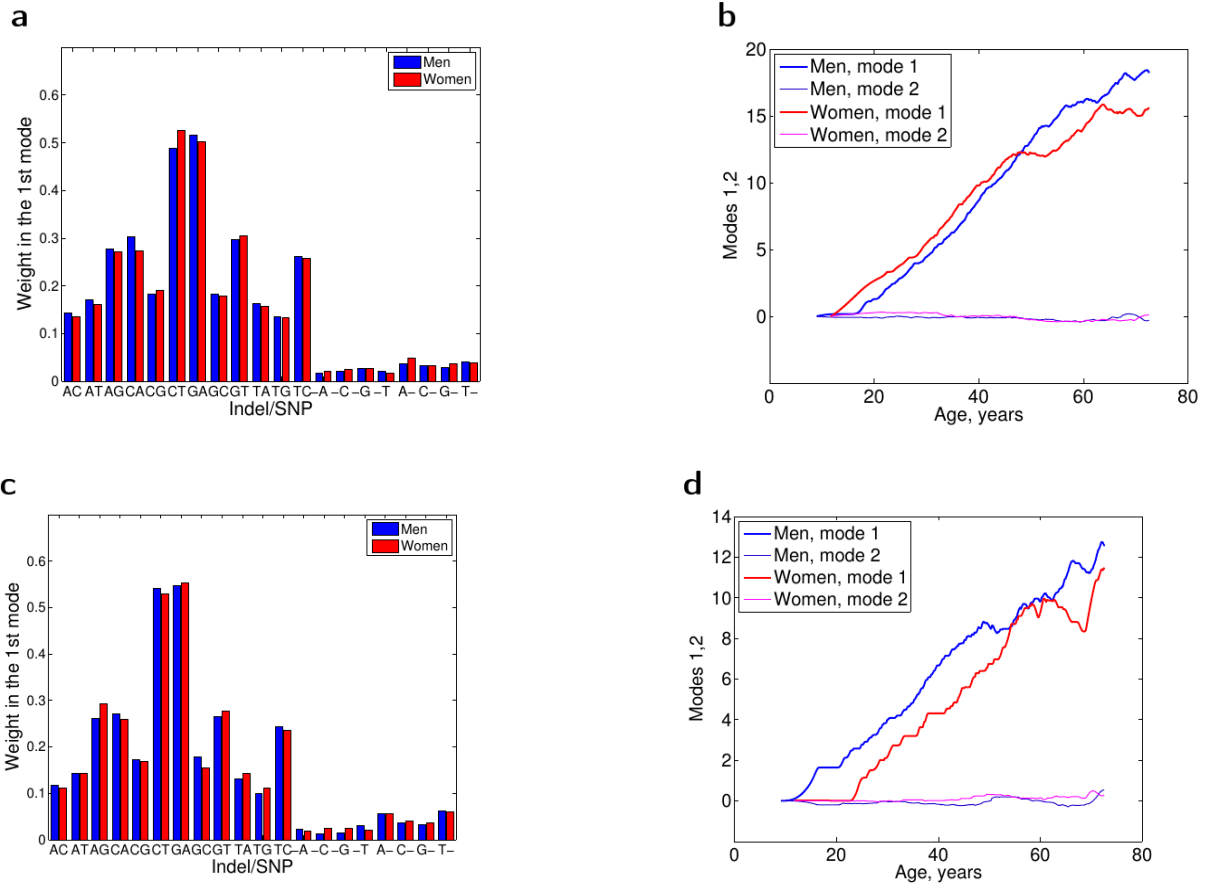

**Supplementary Figure 55** | Modal structure of somatic mutation load in kidney renal clear cell carcinoma (KIRC). **a.** BCM, mixed IlluminaGA and SOLiD; relative weights of different SNVs and indels. **b.** BCM, mixed IlluminaGA and SOLiD; count estimation using projection on the leading pattern. **c.** BI, IlluminaGA DNaseq, automated pipeline; relative weights of different SNVs and indels. **d.** BI, IlluminaGA DNaseq, automated pipeline; count estimation using projection on the leading pattern.

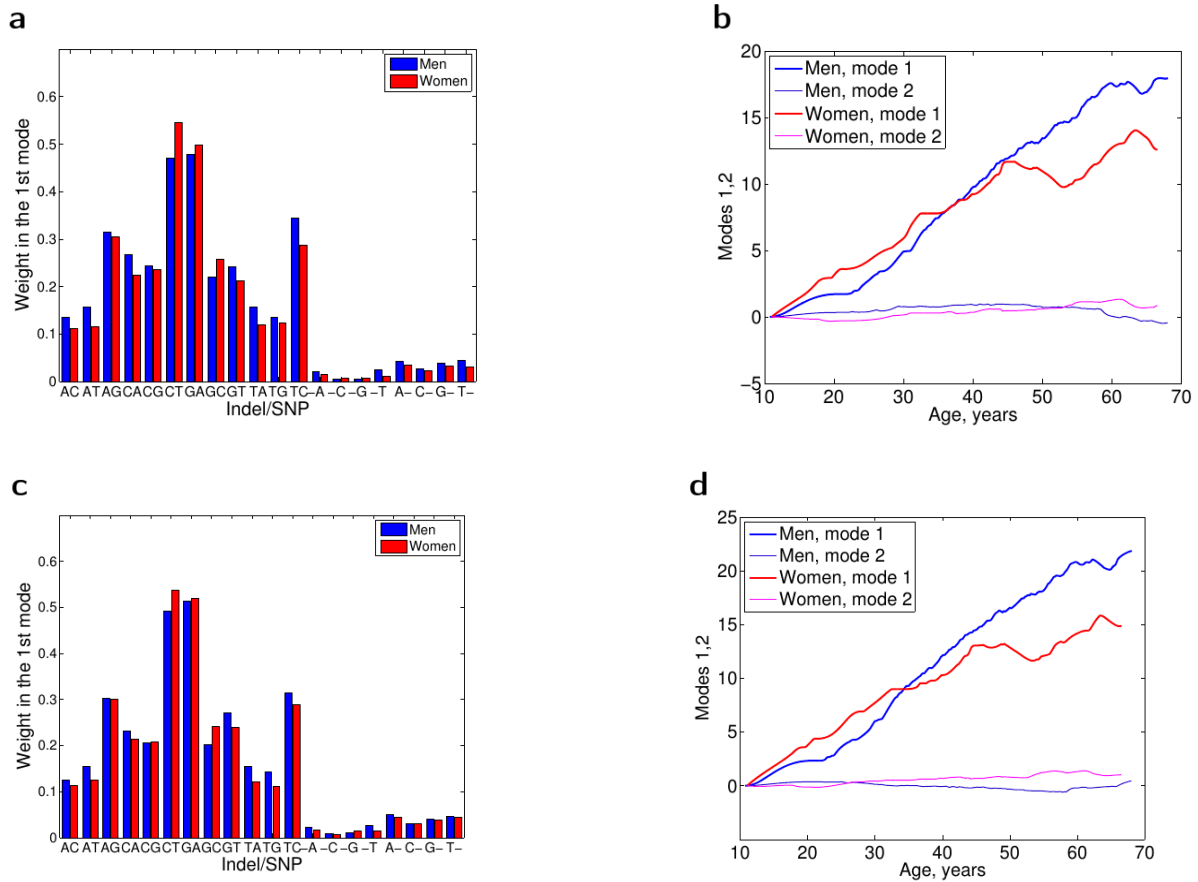

**Supplementary Figure 56** | Modal structure of somatic mutation load in kidney renal papillary cell carcinoma (KIRP). **a.** BCM, IlluminaGA DNaseq, curated pipeline; relative weights of different SNVs and indels. **b.** BCM, IlluminaGA DNaseq, curated pipeline; count estimation using projection on the leading pattern. **c.** BCM, mixed IlluminaGA and SOLiD, curated pipeline; relative weights of different SNVs and indels. **d.** BCM, mixed IlluminaGA and SOLiD, curated pipeline; count estimation using projection on the leading pattern.

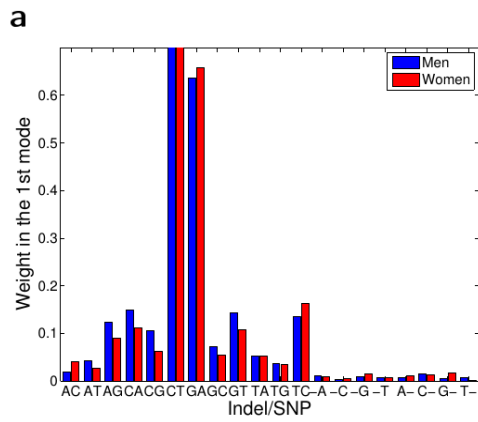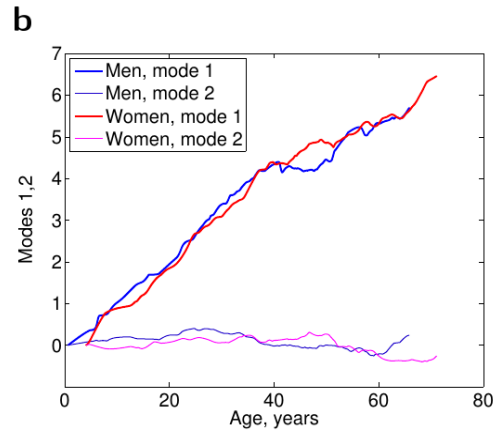

**Supplementary Figure 57** | Modal structure of somatic mutation load in acute myeloid leukemia (LAML). **a.** WUSM, IlluminaGA DNaseq; relative weights of different SNVs and indels. **b.** WUSM, IlluminaGA DNaseq; count estimation using projection on the leading pattern.

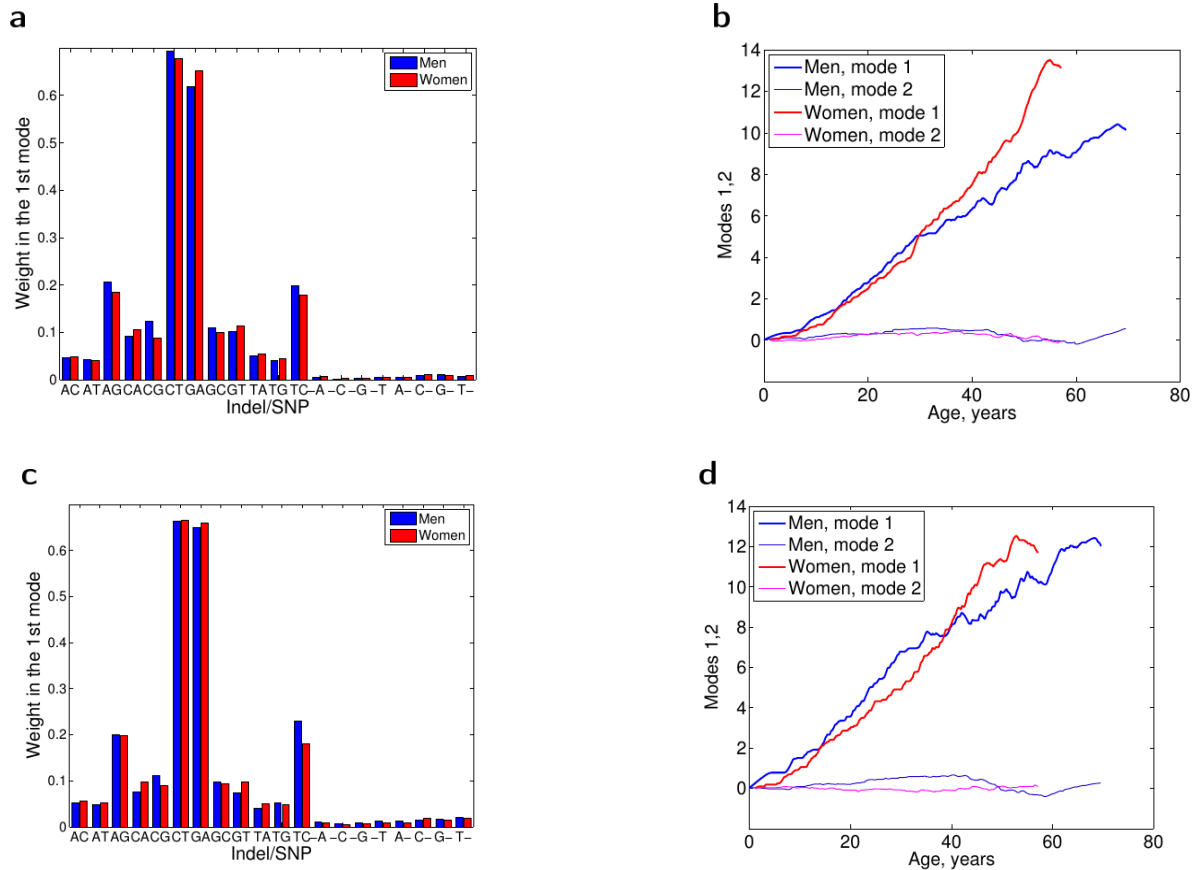

**Supplementary Figure 58** | Modal structure of somatic mutation load in brain lower grade glioma (LGG). **a.** BCM, IlluminaGA DNaseq, automated pipeline; relative weights of different SNVs and indels. **b.** BCM, IlluminaGA DNaseq, automated pipeline; count estimation using projection on the leading pattern. **c.** BI, IlluminaGA DNaseq; relative weights of different SNVs and indels. **d.** BI, IlluminaGA DNaseq; count estimation using projection on the leading pattern.

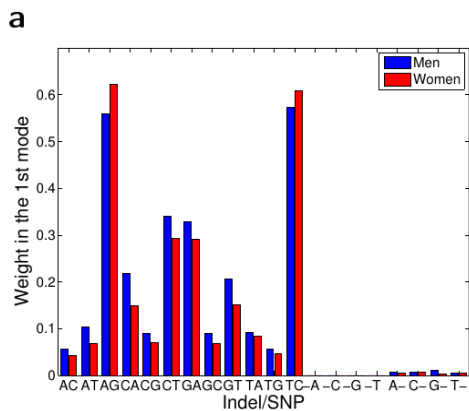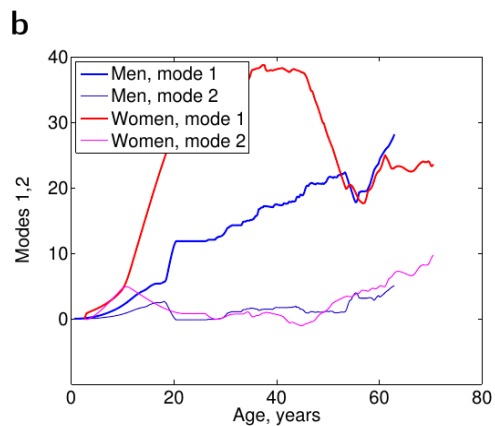

**Supplementary Figure 59** | Modal structure of somatic mutation load in liver hepatocellular carcinoma (LIHC). **a.** BCGSC, IlluminaHiSeq DNaseq, automated pipeline; relative weights of different SNVs and indels. **b.** BCGSC, IlluminaHiSeq DNaseq, automated pipeline; count estimation using projection on the leading pattern.

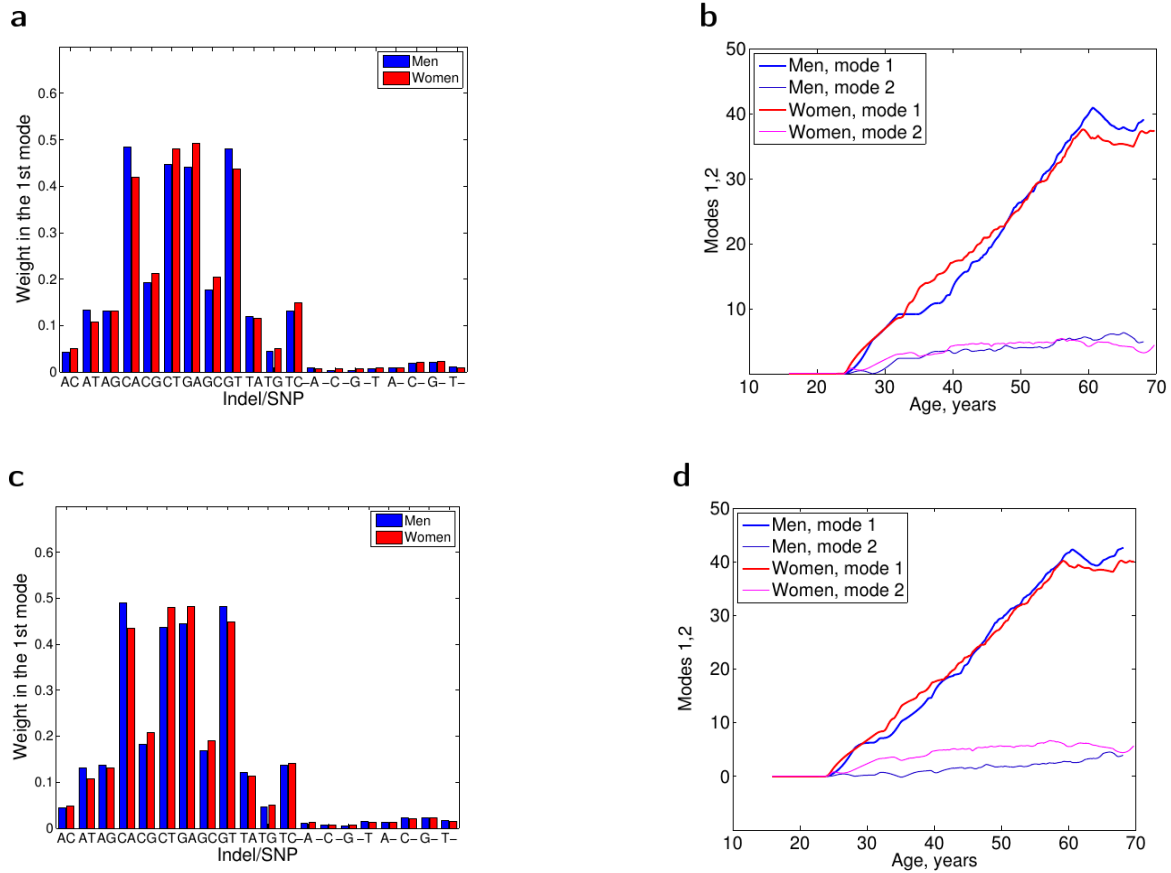

**Supplementary Figure 60** | Modal structure of somatic mutation load in lung adenocarcinoma (LUAD). **a.** BI, IlluminaGA DNaseq; relative weights of different SNVs and indels. **b.** BI, IlluminaGA DNaseq; count estimation using projection on the leading pattern. **c.** BI, IlluminaGA DNaseq, automated pipeline; relative weights of different SNVs and indels. **d.** BI, IlluminaGA DNaseq, automated pipeline; count estimation using projection on the leading pattern.



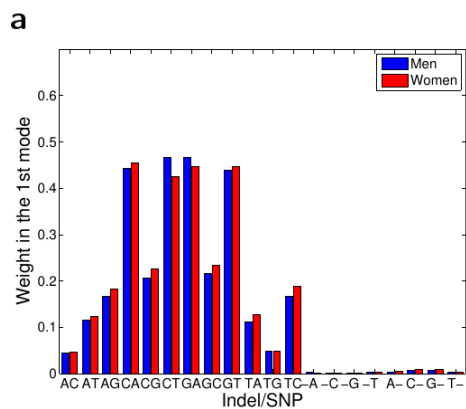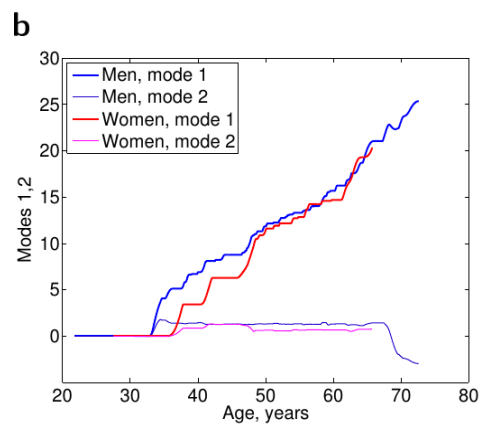

**Supplementary Figure 61** | Modal structure of somatic mutation load in lung squamous cell carcinoma (LUSC). **a.** BI, IlluminaGA DNaseq; relative weights of different SNVs and indels. **b.** BI, IlluminaGA DNaseq; count estimation using projection on the leading pattern.

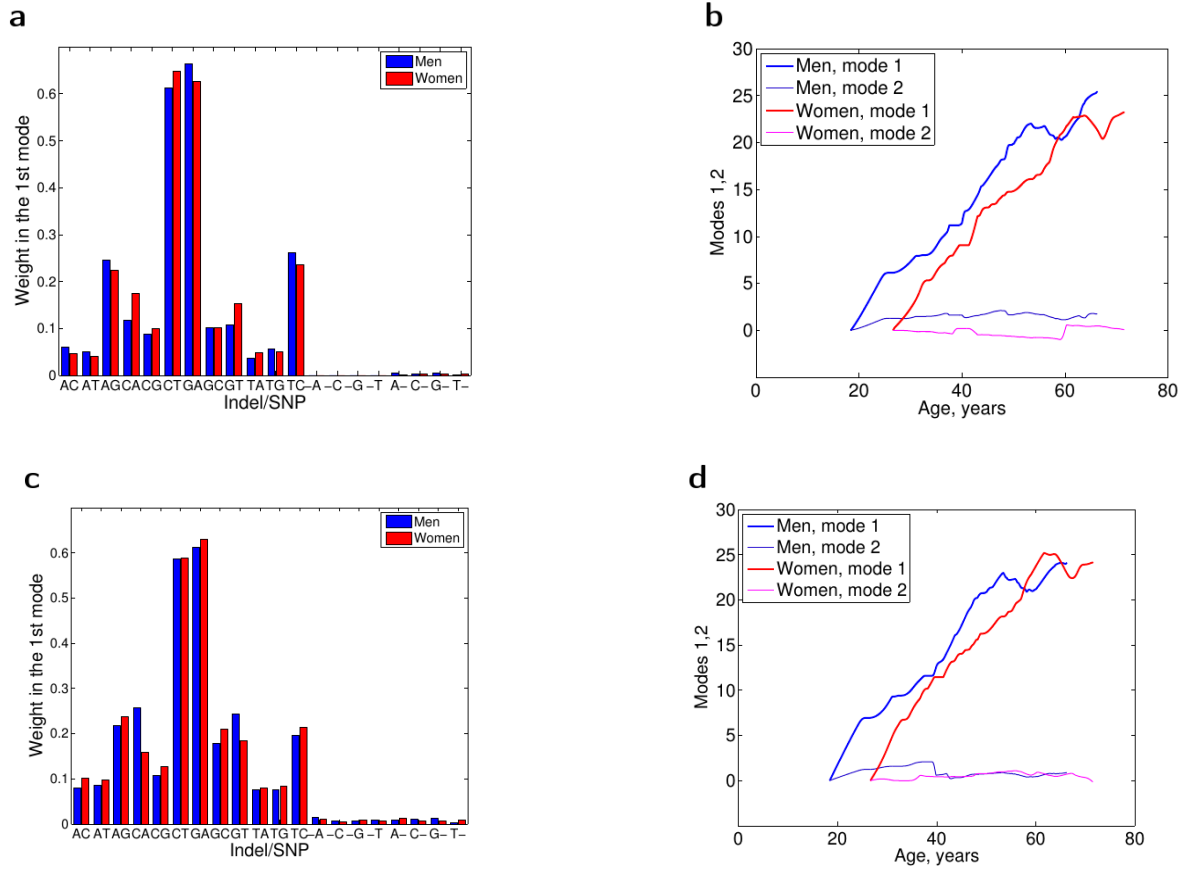

**Supplementary Figure 62** | Modal structure of somatic mutation load in lung adenocarcinoma (LUAD). **a.** BCGSC, IlluminaHiSeq DNaseq, automated pipeline; relative weights of different SNVs and indels. **b.** BCGSC, IlluminaHiSeq DNaseq, automated pipeline; count estimation using projection on the leading pattern. **c.** BCM, IlluminaGA DNaseq, automated pipeline; relative weights of different SNVs and indels. **d.** BCM, IlluminaGA DNaseq, automated pipeline; count estimation using projection on the leading pattern.

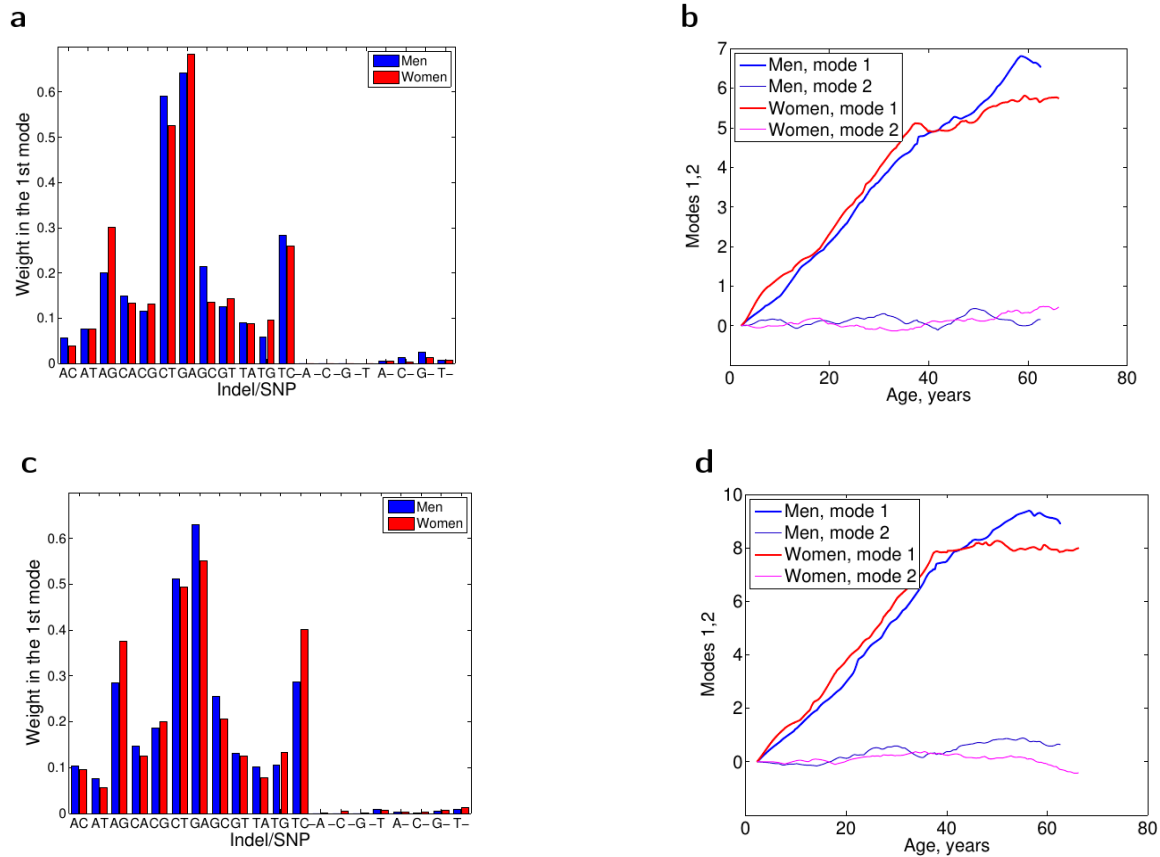

**Supplementary Figure 63** | Modal structure of somatic mutation load in pheochromocytoma and paraganglioma (PCPG). **a.** BCGSC, IlluminaHiSeq DNaseq, automated pipeline; relative weights of different SNVs and indels. **b.** BCGSC, IlluminaHiSeq DNaseq, automated pipeline; count estimation using projection on the leading pattern. **c.** BCM, IlluminaGA DNaseq, automated pipeline; relative weights of different SNVs and indels. **d.** BCM, IlluminaGA DNaseq, automated pipeline; count estimation using projection on the leading pattern.

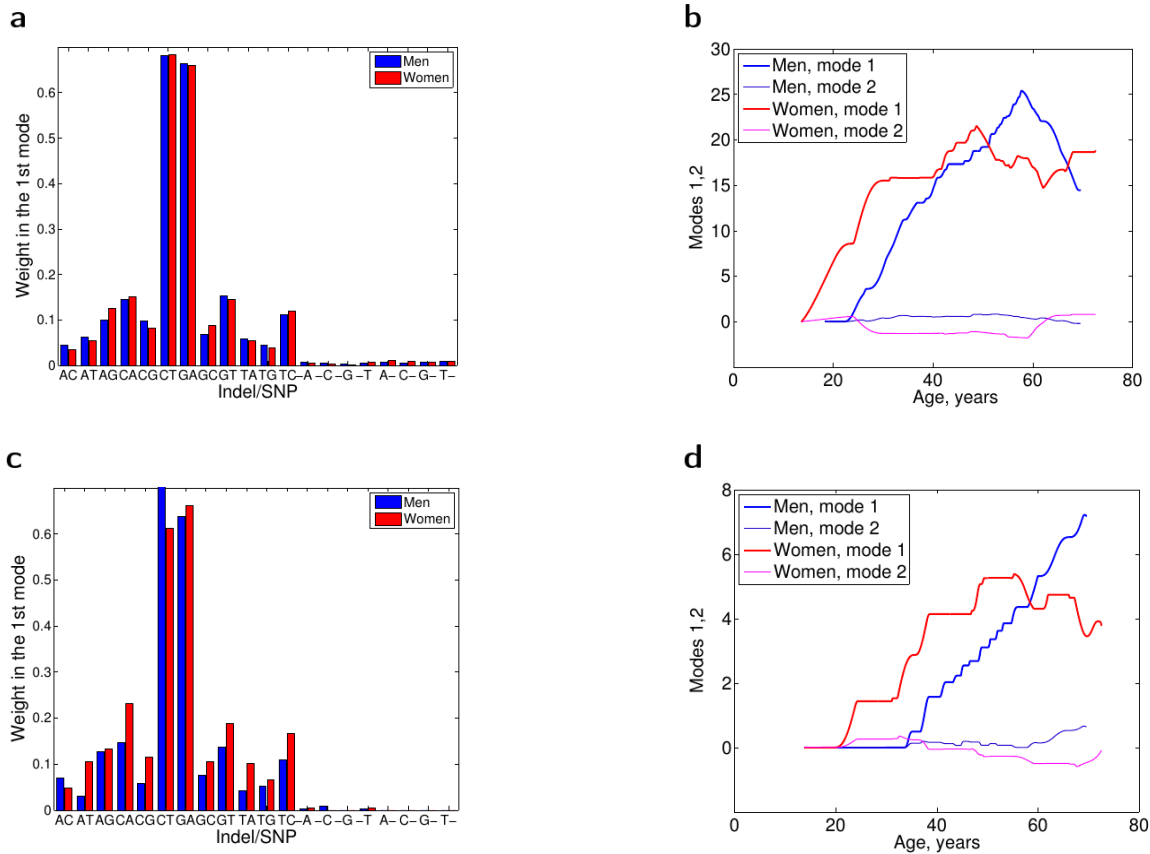

**Supplementary Figure 64** | Modal structure of somatic mutation load in rectum adenocarcinoma (READ). **a.** BCM, IlluminaHiSeq DNaseq; relative weights of different SNVs and indels. **b.** BCM, IlluminaHiSeq DNaseq; count estimation using projection on the leading pattern. **c.** BCM, SOLiD DNaseq; relative weights of different SNVs and indels. **d.** BCM, SOLiD DNaseq; count estimation using projection on the leading pattern.

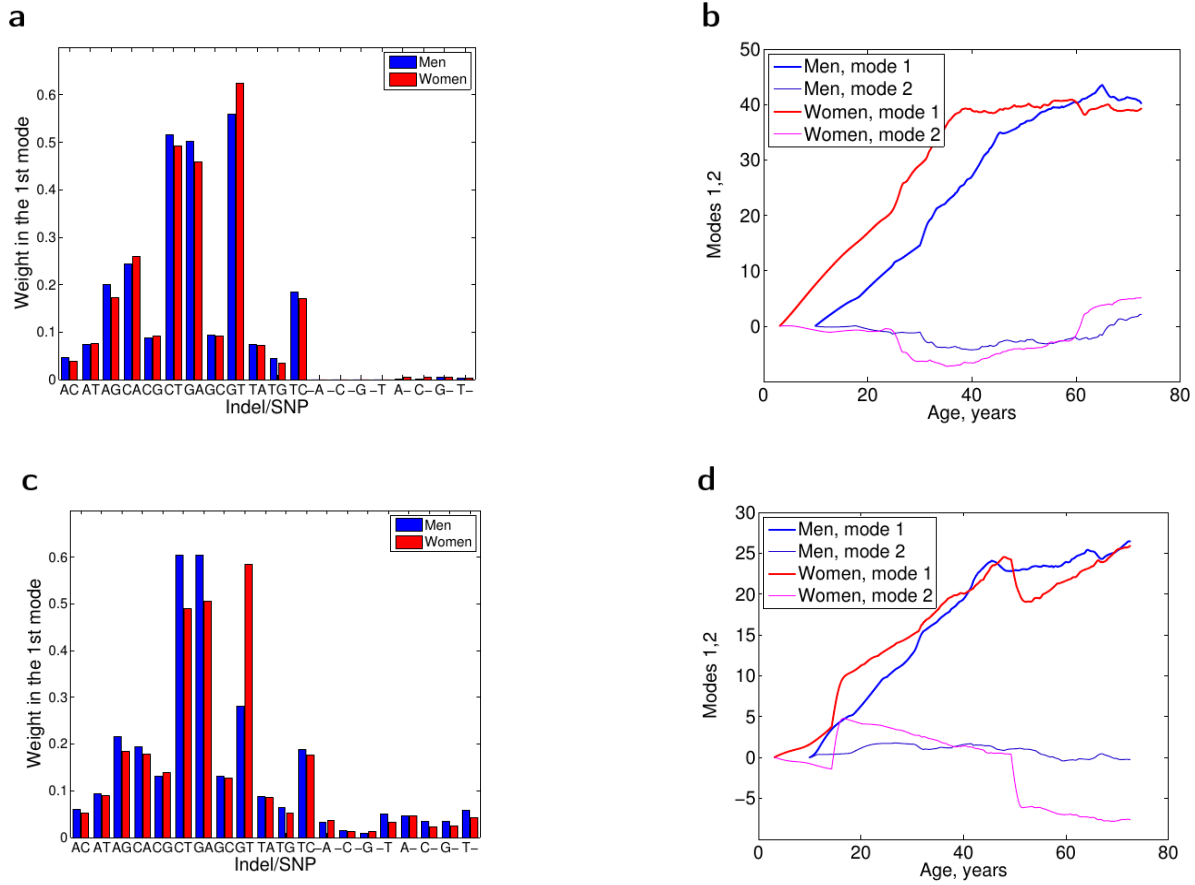

**Supplementary Figure 65** | Modal structure of somatic mutation load in sarcoma (SARC). **a.** BCGSC, IlluminaHiSeq DNaseq, automated pipeline; relative weights of different SNVs and indels. **b.** BCGSC, IlluminaHiSeq DNaseq, automated pipeline; count estimation using projection on the leading pattern. **c.** BI, IlluminaGA DNaseq, automated pipeline; relative weights of different SNVs and indels. **d.** BI, IlluminaGA DNaseq, automated pipeline; count estimation using projection on the leading pattern.

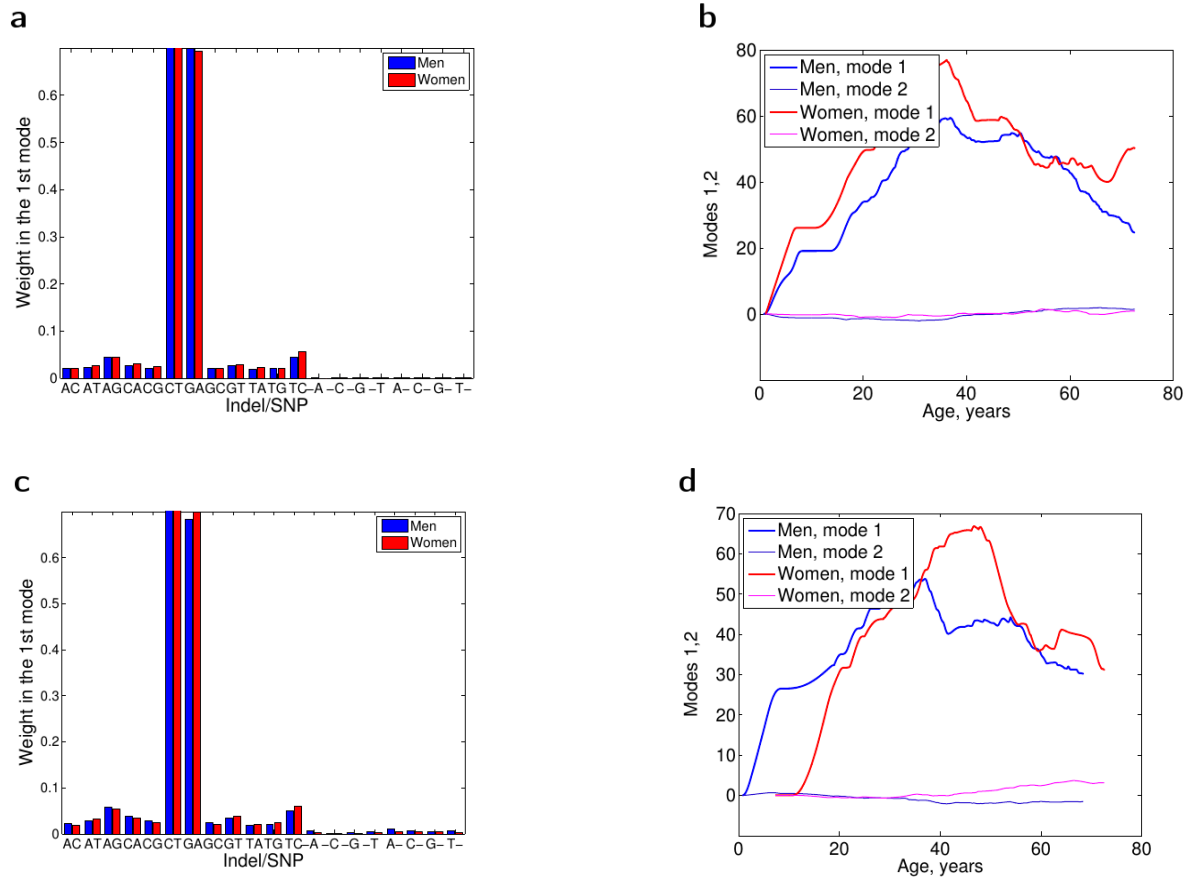

**Supplementary Figure 66** | Modal structure of somatic mutation load in skin cutaneous melanoma (SKCM). **a.** BCM, IlluminaGA DNaseq, automated pipeline; relative weights of different SNVs and indels. **b.** BCM, IlluminaGA DNaseq, automated pipeline; count estimation using projection on the leading pattern. **c.** BI, IlluminaGA DNaseq, automated pipeline; relative weights of different SNVs and indels. **d.** BI, IlluminaGA DNaseq, automated pipeline; count estimation using projection on the leading pattern.

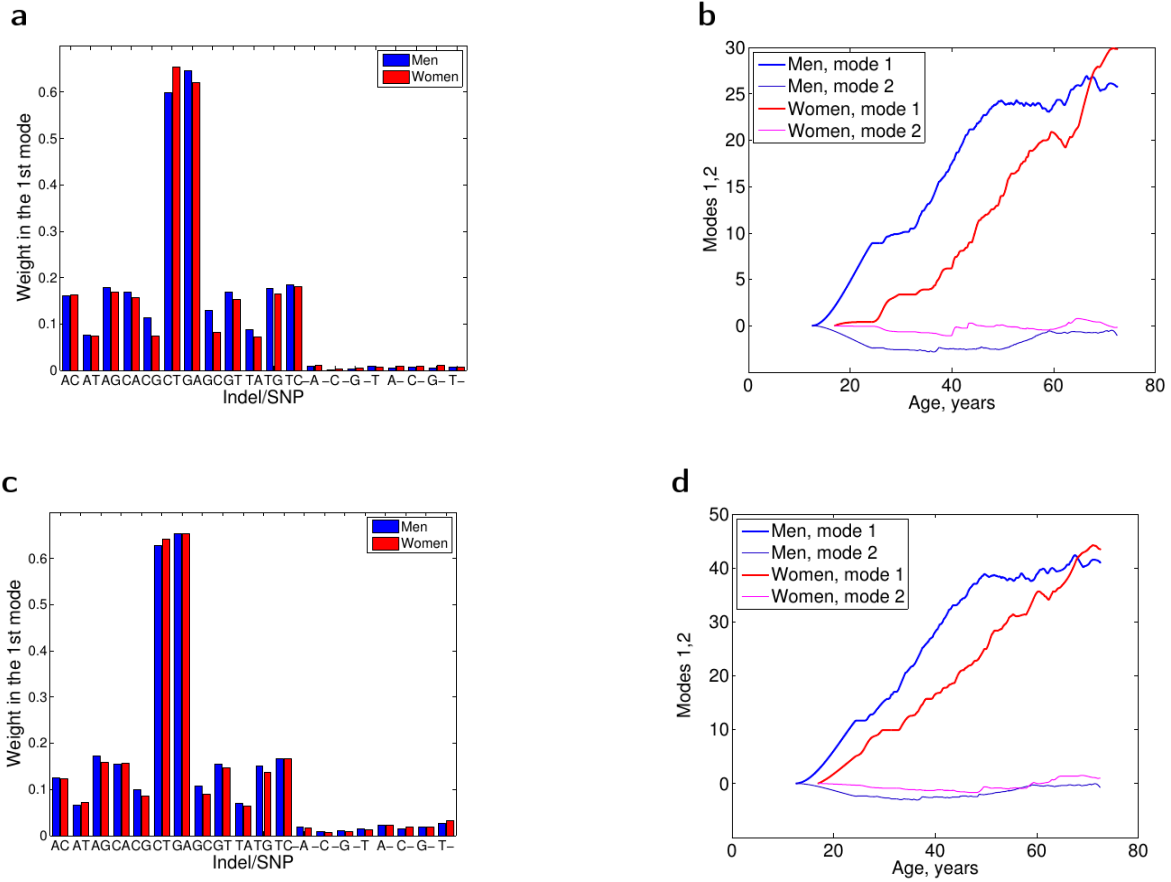

**Supplementary Figure 67** | Modal structure of somatic mutation load in stomach adenocarcinoma (STAD). **a.** BCM, IlluminaGA DNaseq, automated pipeline; relative weights of different SNVs and indels. **b.** BCM, IlluminaGA DNaseq, automated pipeline; count estimation using projection on the leading pattern. **c.** BI, IlluminaGA DNaseq, automated pipeline; relative weights of different SNVs and indels. **d.** BI, IlluminaGA DNaseq, automated pipeline; count estimation using projection on the leading pattern.

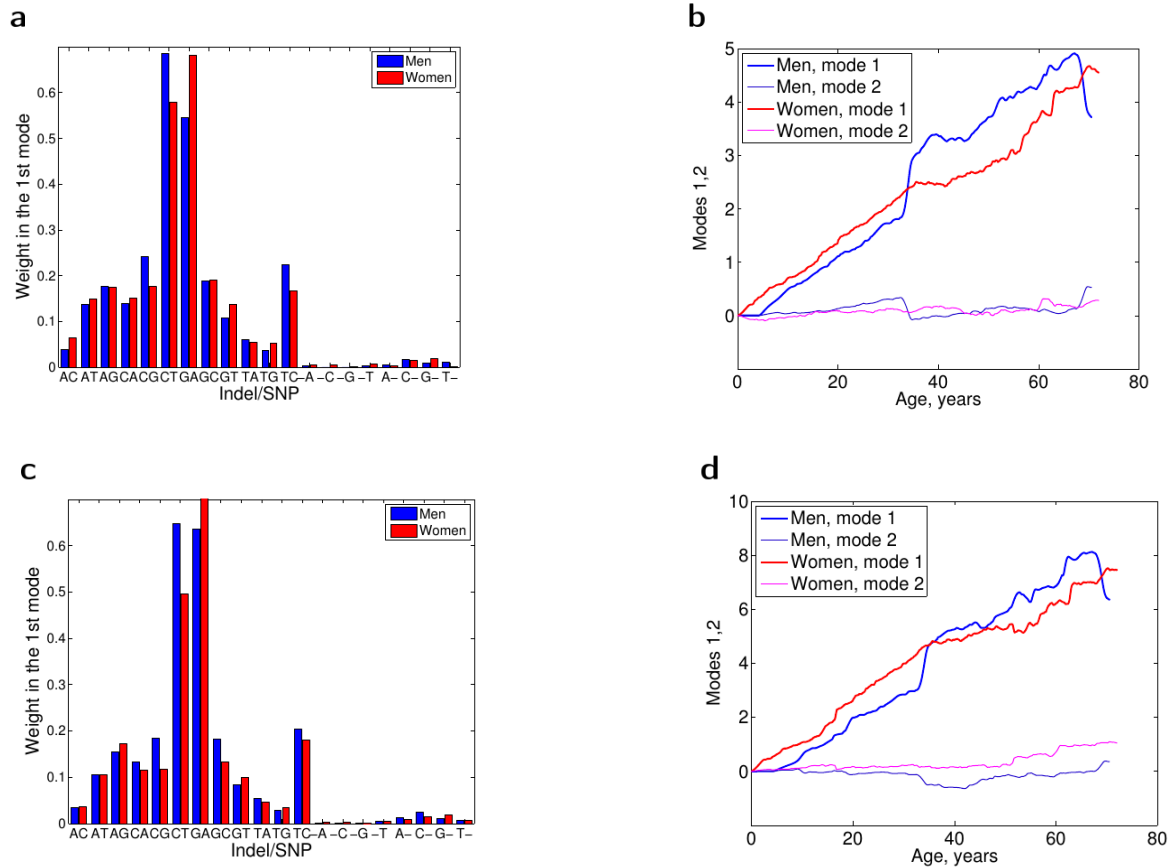

**Supplementary Figure 68** | Modal structure of somatic mutation load in thyroid carcinoma (THCA). **a.** BCM, IlluminaGA DNaseq, automated pipeline; relative weights of different SNVs and indels. **b.** BCM, IlluminaGA DNaseq, automated pipeline; count estimation using projection on the leading pattern. **c.** BI, IlluminaGA DNaseq; relative weights of different SNVs and indels. **d.** BI, IlluminaGA DNaseq; count estimation using projection on the leading pattern.



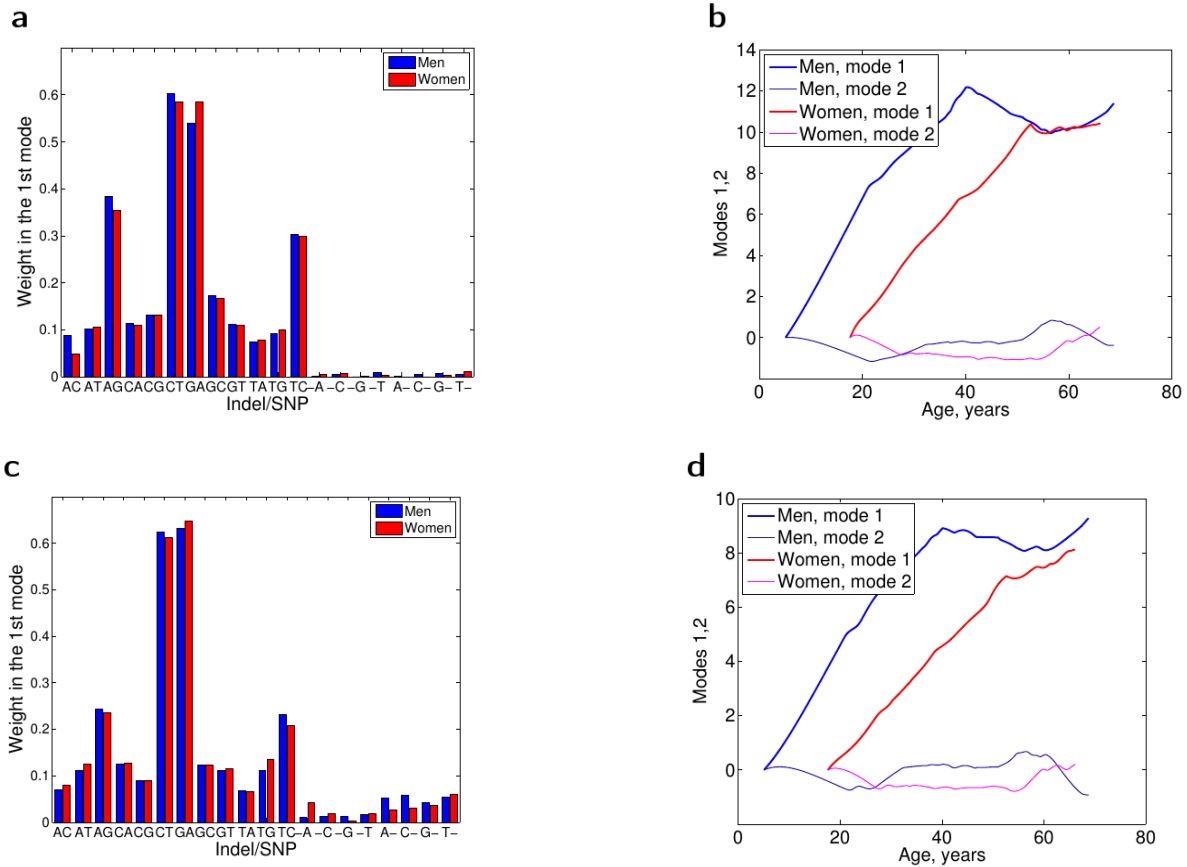

**Supplementary Figure 69** | Modal structure of somatic mutation load in uveal melanoma (UVM). **a.** BCM, IlluminaGA DNaseq, automated pipeline; relative weights of different SNVs and indels. **b.** BCM, IlluminaGA DNaseq, automated pipeline; count estimation using projection on the leading pattern. **c.** BI, IlluminaGA DNaseq, automated pipeline; relative weights of different SNVs and indels. **d.** BI, IlluminaGA DNaseq, automated pipeline; count estimation using projection on the leading pattern.

**Supplementary Table 1.** Somatic mutation accumulation rates in different cancer types (women). Errors are s.d. determined by bootstrapping, see Methods.

| Cancer | Datacenter, technology, pipeline | $R_{full}$ , 1/year/exome | $R_{silent}$ , 1/year/exome | $\alpha_{full}$ , 1/year | $\alpha_{silent}$ , 1/year |
|--------|----------------------------------|---------------------------|-----------------------------|--------------------------|----------------------------|
| ACC    | BCM,IlluminaGA,autom.            | 1.9429±0.0018             | 0.7747±0.0004               | 0.1407±0.0001            | 0.1457±0.0001              |
| ACC    | BCM,IlluminaGA,cur.              | 0.5744±0.0005             | 0.1536±0.0000               | 0.1301±0.0001            | 0.1404±0.0001              |
| ACC    | BCM,mixed,cur.                   | 3.1138±0.0052             | 1.1939±0.0010               | 0.1407±0.0001            | 0.1466±0.0001              |
| ACC    | BI,IlluminaGA,cur.               | 1.2921±0.0009             | 0.2693±0.0000               | 0.1323±0.0001            | 0.1266±0.0001              |
| BLCA   | BI,IlluminaGA,                   | 1.0181±0.0086             | 0.4339±0.0018               | 0.1238±0.0001            | 0.1680±0.0002              |
| BLCA   | BI,IlluminaGA,autom.             | 2.0762±0.0180             | 0.7617±0.0031               | 0.1228±0.0000            | 0.1594±0.0001              |
| BLCA   | BI,IlluminaGA,cur.               | 0.9689±0.0051             | 0.5299±0.0010               | 0.0860±0.0002            | 0.0731±0.0000              |
| BRCA   | WUSM,IlluminaGA                  | 1.1525±0.0003             | 0.2262±0.0000               | 0.1341±0.0001            | 0.1462±0.0001              |
| BRCA   | WUSM,IlluminaGA,cur.             | 1.1922±0.0009             | 0.3339±0.0000               | 0.1532±0.0001            | 0.1587±0.0004              |
| CESC   | BCGSC,IlluminaHiSeq,autom.       | 2.7436±0.0063             | 1.3251±0.0038               | 0.1494±0.0001            | 0.1929±0.0002              |
| CESC   | BI,IlluminaGA                    | 0.5505±0.0005             | 0.1718±0.0001               | 0.1635±0.0002            | 0.2284±0.0006              |
| CESC   | BI,IlluminaGA,autom.             | 0.5226±0.0004             | 0.1713±0.0001               | 0.1698±0.0003            | 0.2152±0.0005              |
| CESC   | UCSC,IlluminaGA,autom.           | 1.9090±0.0028             | 0.8186±0.0026               | 0.1802±0.0002            | 0.2266±0.0002              |
| CESC   | WUSM,IlluminaGA,cur.             | 2.4923±0.0031             | 0.8478±0.0024               | 0.1516±0.0002            | 0.2027±0.0002              |
| CHOL   | BCGSC,IlluminaHiSeq,autom.       | 0.2945±0.0006             | 0.0710±0.0000               | 0.0697±0.0000            | 0.0701±0.0000              |
| CHOL   | BCM,IlluminaGA,autom.            | 0.5789±0.0023             | 0.1622±0.0002               | 0.0808±0.0001            | 0.0997±0.0001              |
| CHOL   | BI,IlluminaGA,autom.             | 0.2873±0.0006             | 0.0562±0.0000               | 0.0744±0.0000            | 0.1004±0.0001              |
| CHOL   | UCSC,IlluminaGA,autom.           | 0.1604±0.0002             | 0.0529±0.0000               | 0.0758±0.0000            | 0.0944±0.0001              |
| COAD   | BCM,IlluminaGA                   | 1.5759±0.0053             | 0.7315±0.0014               | 0.1408±0.0002            | 0.1621±0.0003              |
| COAD   | BCM,SOLiD                        | 0.0637±0.0001             | 0.1003±0.0001               | 0.0266±0.0000            | 0.1225±0.0004              |
| ESCA   | BCGSC,IlluminaHiSeq,autom.       | 1.5824±0.0132             | 0.4244±0.0011               | 0.1139±0.0001            | 0.1281±0.0001              |
| ESCA   | BCM,IlluminaGA,autom.            | 2.0547±0.0210             | 0.5533±0.0017               | 0.1006±0.0000            | 0.1203±0.0001              |
| ESCA   | BI,IlluminaGA,autom.             | 1.4434±0.0117             | 0.4092±0.0011               | 0.1138±0.0001            | 0.1446±0.0001              |
| ESCA   | UCSC,IlluminaGA,autom.           | 1.3795±0.0118             | 0.3217±0.0006               | 0.1476±0.0001            | 0.1509±0.0001              |
| GBM    | BI,IlluminaGA                    | 0.2446±0.0003             | 0.0554±0.0000               | 0.0952±0.0001            | 0.0951±0.0001              |
| HNSC   | BI,IlluminaGA                    | 0.7703±0.0048             | 0.2471±0.0005               | 0.0561±0.0001            | 0.0705±0.0001              |
| HNSC   | BI,IlluminaGA,autom.             | 1.4736±0.0060             | 0.3949±0.0008               | 0.1621±0.0003            | 0.1633±0.0002              |
| KICH   | BCM,IlluminaGA                   | 0.0677±0.0001             | 0.0126±0.0000               | 0.0926±0.0001            | 0.0972±0.0001              |
| KICH   | BCM,mixed,cur.                   | 0.5056±0.0030             | 0.1297±0.0002               | 0.0849±0.0001            | 0.0848±0.0001              |
| KICH   | BI,IlluminaGA,                   | 0.1801±0.0004             | 0.0343±0.0000               | 0.0798±0.0001            | 0.0904±0.0001              |
| KIRC   | BCM,mixed                        | 0.7688±0.0035             | 0.1681±0.0002               | 0.1631±0.0000            | 0.1981±0.0001              |
| KIRC   | BI,IlluminaGA,autom.             | 0.7946±0.0006             | 0.4386±0.0008               | 0.1045±0.0001            | 0.1738±0.0001              |
| KIRP   | BCM,IlluminaGA,cur.              | 0.5469±0.0012             | 0.1296±0.0001               | 0.1139±0.0000            | 0.0956±0.0000              |
| KIRP   | BCM,Mixed,cur.                   | 0.6573±0.0010             | 0.1569±0.0001               | 0.1125±0.0000            | 0.0972±0.0000              |

|             |                            |               |               |               |               |
|-------------|----------------------------|---------------|---------------|---------------|---------------|
| <b>KIRP</b> | BI,IlluminaGA              | 0.3288±0.0006 | 0.0677±0.0000 | 0.0594±0.0000 | 0.0447±0.0000 |
| <b>KIRP</b> | BI,IlluminaGA,autom.       | 0.3697±0.0009 | 0.0653±0.0000 | 0.0629±0.0000 | 0.0448±0.0000 |
| <b>KIRP</b> | BI,IlluminaGA,cur.         | 0.5798±0.0012 | 0.1171±0.0000 | 0.0837±0.0000 | 0.0640±0.0000 |
| <b>KIRP</b> | UCSC,IlluminaGA,autom.     | 0.3606±0.0005 | 0.1557±0.0005 | 0.0984±0.0000 | 0.1215±0.0001 |
| <b>LAML</b> | WUSM,IlluminaGA            | 0.2076±0.0001 | 0.0445±0.0000 | 0.1244±0.0001 | 0.1406±0.0003 |
| <b>LGG</b>  | BCM,IlluminaGA,autom.      | 0.3689±0.0002 | 0.1055±0.0000 | 0.1503±0.0000 | 0.1600±0.0001 |
| <b>LGG</b>  | BI,IlluminaGA              | 0.4227±0.0002 | 0.9229±0.0411 | 0.1314±0.0000 | 0.2523±0.0005 |
| <b>LGG</b>  | BI,IlluminaGA,autom.       | 1.0416±0.0012 | 1.0635±0.0468 | 0.1648±0.0001 | 0.2441±0.0003 |
| <b>LGG</b>  | BI,IlluminaGA,cur.         | 0.5981±0.0005 | 0.1339±0.0000 | 0.1417±0.0000 | 0.1507±0.0000 |
| <b>LIHC</b> | BCGSC,IlluminaHiSeq,autom. | 0.7157±0.0034 | 0.3764±0.0027 | 0.0790±0.0001 | 0.0885±0.0003 |
| <b>LIHC</b> | BCM,IlluminaGA,autom.      | 0.3511±0.0013 | 0.0937±0.0001 | 0.1157±0.0003 | 0.1171±0.0003 |
| <b>LIHC</b> | BCM,mixed,cur.             | 0.4919±0.0025 | 0.1212±0.0002 | 0.1158±0.0003 | 0.1137±0.0003 |
| <b>LIHC</b> | BI,IlluminaGA,autom.       | 0.4816±0.0017 | 0.1624±0.0002 | 0.1031±0.0001 | 0.1122±0.0003 |
| <b>LIHC</b> | UCSC,IlluminaGA,autom.     | 0.3653±0.0015 | 0.0851±0.0001 | 0.1107±0.0003 | 0.0972±0.0002 |
| <b>LUAD</b> | BI,IlluminaGA              | 2.9307±0.0059 | 2.8546±0.0122 | 0.1305±0.0001 | 0.1317±0.0002 |
| <b>LUAD</b> | BI,IlluminaGA,autom.       | 3.2698±0.0076 | 3.1238±0.0106 | 0.1371±0.0001 | 0.1392±0.0002 |
| <b>LUSC</b> | BI,IlluminaGA              | 2.2059±0.0084 | 0.8414±0.0007 | 0.1243±0.0001 | 0.0983±0.0000 |
| <b>OV</b>   | BCM,SOLiD,cur.             | 0.1896±0.0000 | 0.0314±0.0000 | 0.1362±0.0001 | 0.1418±0.0001 |
| <b>OV</b>   | BI,IlluminaGA              | 0.2093±0.0000 | 0.0453±0.0000 | 0.1413±0.0003 | 0.1409±0.0002 |
| <b>OV</b>   | WUSM,IlluminaGA            | 0.5382±0.0032 | 0.1193±0.0002 | 0.2424±0.0002 | 0.2343±0.0002 |
| <b>PAAD</b> | BCGSC,IlluminaHiSeq,autom. | 1.2652±0.0012 | 2.9848±0.3132 | 0.1367±0.0001 | 0.2121±0.0024 |
| <b>PAAD</b> | BCM,IlluminaGA,autom.      | 1.5968±0.0027 | 0.9587±0.0266 | 0.1299±0.0001 | 0.1805±0.0014 |
| <b>PAAD</b> | BI,IlluminaGA              | 0.6053±0.0009 | 1.1815±0.0455 | 0.0833±0.0001 | 0.1629±0.0003 |
| <b>PAAD</b> | BI,IlluminaGA,autom.       | 3.8809±0.0125 | 1.9321±0.0535 | 0.1361±0.0001 | 0.1652±0.0001 |
| <b>PAAD</b> | UCSC,IlluminaGA,autom.     | 0.6379±0.0016 | 0.3144±0.0104 | 0.1264±0.0003 | 0.1583±0.0005 |
| <b>PCPG</b> | BCGSC,IlluminaHiSeq,autom. | 0.1433±0.0000 | 0.0368±0.0000 | 0.1059±0.0000 | 0.0793±0.0000 |
| <b>PCPG</b> | BCM,IlluminaGA,autom.      | 0.2730±0.0001 | 0.0434±0.0000 | 0.1180±0.0001 | 0.0959±0.0000 |
| <b>PCPG</b> | BI,IlluminaGA,autom.       | 0.2672±0.0001 | 0.0480±0.0000 | 0.1081±0.0001 | 0.0841±0.0000 |
| <b>PCPG</b> | UCSC,IlluminaGA,autom.     | 0.1525±0.0001 | 0.0460±0.0000 | 0.1063±0.0000 | 0.0846±0.0000 |
| <b>READ</b> | BCM,IlluminaGA             | 0.4438±0.0013 | 0.1396±0.0002 | 0.1082±0.0001 | 0.1222±0.0001 |
| <b>READ</b> | BCM,SOLiD                  | 0.3904±0.0008 | 0.0975±0.0001 | 0.1350±0.0001 | 0.1235±0.0001 |
| <b>SARC</b> | BCGSC,IlluminaHiSeq,autom. | 0.8523±0.0019 | 0.7174±0.0038 | 0.1208±0.0000 | 0.2012±0.0002 |
| <b>SARC</b> | BI,IlluminaGA,autom.       | 0.8240±0.0034 | 0.1366±0.0001 | 0.1546±0.0001 | 0.1546±0.0001 |
| <b>SARC</b> | UCSC,IlluminaGA,autom.     | 0.3827±0.0008 | 0.2152±0.0003 | 0.1527±0.0000 | 0.1850±0.0002 |
| <b>SKCM</b> | BCM,IlluminaGA,autom.      | 2.1306±0.0247 | 2.6886±0.0809 | 0.1006±0.0000 | 0.1149±0.0001 |
| <b>SKCM</b> | BI,IlluminaGA              | 2.9425±0.0143 | 3.9496±0.0519 | 0.1422±0.0003 | 0.0790±0.0001 |
| <b>SKCM</b> | BI,IlluminaGA,autom.       | 2.9309±0.0199 | 4.2844±0.0604 | 0.1410±0.0004 | 0.0806±0.0001 |
| <b>STAD</b> | BCGSC,IlluminaHiSeq,autom. | 0.3740±0.0015 | 0.0951±0.0002 | 0.1078±0.0001 | 0.0991±0.0001 |
| <b>STAD</b> | BCM,IlluminaGA,autom.      | 0.4049±0.0009 | 0.4030±0.0061 | 0.1768±0.0003 | 0.2684±0.0004 |
| <b>STAD</b> | BI,IlluminaGA              | 1.3536±0.0028 | 1.8059±0.0097 | 0.1031±0.0000 | 0.2120±0.0003 |

|             |                            |               |               |               |               |
|-------------|----------------------------|---------------|---------------|---------------|---------------|
| <b>STAD</b> | BI,IlluminaGA,autom.       | 1.1559±0.0046 | 0.6909±0.0147 | 0.1962±0.0003 | 0.2686±0.0003 |
| <b>STAD</b> | BI,IlluminaGA,cur.         | 0.5146±0.0015 | 0.5878±0.0133 | 0.1643±0.0002 | 0.2577±0.0004 |
| <b>THCA</b> | BCM,IlluminaGA,autom.      | 0.1994±0.0000 | 0.0529±0.0000 | 0.1706±0.0005 | 0.1503±0.0004 |
| <b>THCA</b> | BI,IlluminaGA              | 0.3211±0.0001 | 0.0751±0.0000 | 0.1525±0.0003 | 0.1436±0.0001 |
| <b>UCEC</b> | BI,IlluminaGA              | 1.0686±0.0008 | 0.4332±0.0008 | 0.1576±0.0003 | 0.1333±0.0002 |
| <b>UCEC</b> | WUSM,IlluminaGA            | 0.6860±0.0003 | 2.3757±0.0314 | 0.1573±0.0002 | 0.0313±0.0000 |
| <b>UCS</b>  | BCM,IlluminaGA,autom.      | 1.1407±0.0029 | 0.3411±0.0003 | 0.1425±0.0001 | 0.1578±0.0001 |
| <b>UCS</b>  | BI,IlluminaGA,autom.       | 1.7946±0.0066 | 0.3893±0.0005 | 0.1420±0.0001 | 0.1684±0.0001 |
| <b>UCS</b>  | BI,IlluminaGA,cur.         | 1.6217±0.0049 | 0.4064±0.0006 | 0.1404±0.0001 | 0.1561±0.0001 |
| <b>UVM</b>  | BCGSC,IlluminaHiSeq,autom. | 0.2281±0.0002 | 0.3186±0.0022 | 0.1002±0.0000 | 0.2006±0.0011 |
| <b>UVM</b>  | BCM,IlluminaGA,autom.      | 0.3063±0.0004 | 0.3470±0.0017 | 0.0801±0.0000 | 0.1281±0.0004 |
| <b>UVM</b>  | BI,IlluminaGA,autom.       | 0.2329±0.0002 | 0.3376±0.0026 | 0.0965±0.0000 | 0.2171±0.0014 |
| <b>UVM</b>  | UCSC,IlluminaGA,autom.     | 0.1496±0.0001 | 0.2160±0.0010 | 0.1083±0.0001 | 0.1827±0.0009 |

**Supplementary Table 2.** Somatic mutation accumulation rates in different cancer types (men). Errors are s.d., determined by bootstrapping, see Methods.

| Cancer | Datacenter, technology, pipeline | $R_{full}$ , 1/year/exome | $R_{silent}$ , 1/year/exome | $\alpha_{full}$ , 1/year | $\alpha_{silent}$ , 1/year |
|--------|----------------------------------|---------------------------|-----------------------------|--------------------------|----------------------------|
| ACC    | BCM,IlluminaGA,autom.            | 0.0945±0.0002             | 0.2139±0.0013               | 0.0263±0.0000            | 0.0763±0.0001              |
| ACC    | BCM,IlluminaGA,cur.              | 0.0871±0.0001             | 0.1668±0.0009               | 0.0652±0.0001            | 0.1535±0.0003              |
| ACC    | BCM,mixed,cur.                   | 0.1717±0.0006             | 0.3671±0.0036               | 0.0315±0.0000            | 0.0898±0.0001              |
| ACC    | BI,IlluminaGA,cur.               | 0.0617±0.0001             | 0.2149±0.0017               | 0.0363±0.0000            | 0.1689±0.0006              |
| BLCA   | BI,IlluminaGA                    | 0.4243±0.0011             | 0.2031±0.0001               | 0.1182±0.0001            | 0.0761±0.0001              |
| BLCA   | BI,IlluminaGA,autom.             | 1.6079±0.0135             | 0.8930±0.0069               | 0.1619±0.0000            | 0.2175±0.0001              |
| BLCA   | BI,IlluminaGA,cur.               | 0.6858±0.0073             | 0.5933±0.0067               | 0.1574±0.0002            | 0.2329±0.0005              |
| BRCA   | WUSM,IlluminaGA                  | 0.1861±0.0007             | 0.0385±0.0000               | 0.0492±0.0000            | 0.0465±0.0000              |
| BRCA   | WUSM,IlluminaGA,cur.             | 0.2011±0.0004             | 0.0487±0.0000               | 0.0561±0.0000            | 0.0570±0.0000              |
| CHOL   | BCGSC,IlluminaHiSeq,autom.       | 1.0173±0.0028             | 0.1947±0.0001               | 0.1138±0.0000            | 0.1076±0.0001              |
| CHOL   | BCM,IlluminaGA,autom.            | 1.8091±0.0070             | 0.3916±0.0003               | 0.1139±0.0001            | 0.1164±0.0001              |
| CHOL   | BI,IlluminaGA,autom.             | 1.6668±0.0082             | 0.2457±0.0001               | 0.1050±0.0000            | 0.0938±0.0000              |
| CHOL   | UCSC,IlluminaGA,autom.           | 0.9276±0.0040             | 0.1863±0.0001               | 0.1211±0.0000            | 0.1185±0.0000              |
| COAD   | BCM,IlluminaGA                   | 0.8474±0.0021             | 2.4542±0.0331               | 0.1071±0.0001            | 0.0849±0.0001              |
| COAD   | BCM,SOLiD                        | 0.1058±0.0001             | 0.0524±0.0001               | 0.1164±0.0002            | 0.1395±0.0002              |
| ESCA   | BCGSC,IlluminaHiSeq,autom.       | 1.6260±0.0554             | 0.4185±0.0041               | 0.1171±0.0001            | 0.1293±0.0002              |
| ESCA   | BCM,IlluminaGA,autom.            | 1.9787±0.0699             | 0.5349±0.0060               | 0.1312±0.0001            | 0.1412±0.0002              |
| ESCA   | BI,IlluminaGA,autom.             | 1.5338±0.0504             | 0.3719±0.0037               | 0.1194±0.0001            | 0.1368±0.0002              |
| ESCA   | UCSC,IlluminaGA,autom.           | 1.2706±0.0369             | 0.3056±0.0023               | 0.1201±0.0001            | 0.1188±0.0002              |
| GBM    | BI,IlluminaGA                    | 0.3712±0.0003             | 0.0743±0.0000               | 0.1292±0.0002            | 0.1203±0.0001              |
| HNSC   | BI,IlluminaGA                    | 0.4938±0.0018             | 0.1337±0.0004               | 0.0863±0.0000            | 0.1034±0.0001              |
| HNSC   | BI,IlluminaGA,autom.             | 0.7247±0.0013             | 0.1910±0.0003               | 0.1189±0.0001            | 0.1156±0.0000              |
| KICH   | BCM,IlluminaGA                   | 0.1618±0.0001             | 0.0407±0.0000               | 0.1079±0.0000            | 0.1117±0.0000              |
| KICH   | BCM,Mixed,cur.                   | 1.0396±0.0044             | 0.2616±0.0004               | 0.1128±0.0000            | 0.1200±0.0000              |
| KICH   | BI,IlluminaGA,                   | 0.4409±0.0008             | 0.0888±0.0000               | 0.1126±0.0000            | 0.1214±0.0000              |
| KIRC   | BCM,mixed                        | 0.7405±0.0030             | 0.1780±0.0002               | 0.2325±0.0003            | 0.2628±0.0005              |
| KIRC   | BI,IlluminaGA,autom.             | 0.7046±0.0005             | 0.2813±0.0005               | 0.1062±0.0001            | 0.1207±0.0005              |
| KIRP   | BCM,IlluminaGA,cur.              | 0.8734±0.0064             | 0.2454±0.0005               | 0.1763±0.0002            | 0.1673±0.0001              |
| KIRP   | BCM,mixed,cur.                   | 1.0116±0.0107             | 0.2501±0.0006               | 0.1733±0.0001            | 0.1624±0.0001              |
| KIRP   | BI,IlluminaGA                    | 0.6483±0.0040             | 0.1405±0.0002               | 0.1574±0.0001            | 0.1376±0.0001              |
| KIRP   | BI,IlluminaGA,autom.             | 0.7444±0.0055             | 0.1590±0.0003               | 0.1753±0.0002            | 0.1510±0.0001              |
| KIRP   | BI,IlluminaGA,cur.               | 1.1436±0.0132             | 0.2687±0.0008               | 0.1984±0.0002            | 0.1833±0.0002              |
| KIRP   | UCSC,IlluminaGA,autom.           | 1.8955±0.0050             | 1.0576±0.0063               | 0.1439±0.0003            | 0.1149±0.0002              |
| LAML   | WUSM,IlluminaGA                  | 0.1726±0.0001             | 0.0379±0.0000               | 0.1586±0.0004            | 0.1708±0.0005              |
| LGG    | BCM,IlluminaGA,autom.            | 0.3318±0.0003             | 0.0672±0.0000               | 0.1600±0.0001            | 0.1609±0.0000              |
| LGG    | BI,IlluminaGA                    | 0.4224±0.0005             | 0.0742±0.0000               | 0.1425±0.0001            | 0.1754±0.0001              |

|             |                            |               |               |               |               |
|-------------|----------------------------|---------------|---------------|---------------|---------------|
| <b>LGG</b>  | BI,IlluminaGA,autom.       | 0.9809±0.0019 | 0.1678±0.0001 | 0.1904±0.0001 | 0.1999±0.0002 |
| <b>LGG</b>  | BI,IlluminaGA,cur.         | 0.5404±0.0005 | 0.0810±0.0000 | 0.1603±0.0001 | 0.1726±0.0000 |
| <b>LIHC</b> | BCGSC,IlluminaHiSeq,autom. | 1.3393±0.0114 | 0.7262±0.0072 | 0.1735±0.0002 | 0.0389±0.0001 |
| <b>LIHC</b> | BCM,IlluminaGA,autom.      | 0.4983±0.0005 | 0.6117±0.0060 | 0.0699±0.0000 | 0.0731±0.0005 |
| <b>LIHC</b> | BCM,mixed,cur.             | 1.1337±0.0059 | 0.4553±0.0072 | 0.0927±0.0000 | 0.0540±0.0004 |
| <b>LIHC</b> | BI,IlluminaGA,autom.       | 1.0842±0.0037 | 0.4638±0.0071 | 0.1543±0.0003 | 0.0539±0.0004 |
| <b>LIHC</b> | UCSC,IlluminaGA,autom.     | 0.7949±0.0010 | 0.3041±0.0059 | 0.0691±0.0000 | 0.0432±0.0003 |
| <b>LUAD</b> | BI,IlluminaGA              | 2.7142±0.0098 | 4.2332±0.0084 | 0.1412±0.0005 | 0.1395±0.0001 |
| <b>LUAD</b> | BI,IlluminaGA,autom.       | 3.2160±0.0065 | 4.1589±0.0110 | 0.1492±0.0004 | 0.1385±0.0001 |
| <b>LUSC</b> | BI,IlluminaGA              | 1.3383±0.0026 | 0.9408±0.0005 | 0.0748±0.0001 | 0.0477±0.0000 |
| <b>PAAD</b> | BCGSC,IlluminaHiSeq,autom. | 0.4994±0.0025 | 0.1488±0.0004 | 0.0997±0.0000 | 0.1115±0.0001 |
| <b>PAAD</b> | BCM,IlluminaGA,autom.      | 0.5629±0.0014 | 0.0874±0.0000 | 0.0808±0.0000 | 0.0891±0.0000 |
| <b>PAAD</b> | BI,IlluminaGA              | 0.6100±0.0038 | 0.0800±0.0001 | 0.0996±0.0001 | 0.0843±0.0001 |
| <b>PAAD</b> | BI,IlluminaGA,autom.       | 1.7058±0.0074 | 0.2139±0.0001 | 0.1023±0.0001 | 0.1127±0.0001 |
| <b>PAAD</b> | UCSC,IlluminaGA,autom.     | 0.1500±0.0002 | 0.0392±0.0000 | 0.0695±0.0000 | 0.0606±0.0000 |
| <b>PCPG</b> | BCGSC,IlluminaHiSeq,autom. | 0.2388±0.0001 | 0.0439±0.0000 | 0.1159±0.0000 | 0.0861±0.0000 |
| <b>PCPG</b> | BCM,IlluminaGA,autom.      | 0.4127±0.0002 | 0.0615±0.0000 | 0.1245±0.0000 | 0.1055±0.0000 |
| <b>PCPG</b> | BI,IlluminaGA,autom.       | 0.4357±0.0002 | 0.0696±0.0000 | 0.1252±0.0000 | 0.1357±0.0001 |
| <b>PCPG</b> | UCSC,IlluminaGA,autom.     | 0.2286±0.0001 | 0.0541±0.0000 | 0.1220±0.0000 | 0.1196±0.0001 |
| <b>PRAD</b> | BCM,IlluminaGA,autom.      | 0.6015±0.0003 | 0.1974±0.0000 | 0.1246±0.0002 | 0.1172±0.0001 |
| <b>PRAD</b> | BI,IlluminaGA,autom.       | 1.2047±0.0001 | 0.2725±0.0000 | 0.1342±0.0002 | 0.1552±0.0003 |
| <b>PRAD</b> | BI,IlluminaGA,cur.         | 1.1487±0.0001 | 0.2611±0.0000 | 0.1316±0.0002 | 0.1528±0.0003 |
| <b>READ</b> | BCM,IlluminaGA             | 1.8285±0.0023 | 1.2048±0.0212 | 0.1197±0.0001 | 0.0263±0.0000 |
| <b>READ</b> | BCM,SOLiD                  | 0.4171±0.0003 | N/A           | 0.1231±0.0001 | N/A           |
| <b>SARC</b> | BCGSC,IlluminaHiSeq,autom. | 0.9468±0.0029 | 0.2607±0.0003 | 0.1092±0.0000 | 0.0943±0.0002 |
| <b>SARC</b> | BI,IlluminaGA,autom.       | 0.9357±0.0016 | 0.1491±0.0001 | 0.1018±0.0002 | 0.1023±0.0002 |
| <b>SARC</b> | UCSC,IlluminaGA,autom.     | 0.4724±0.0008 | 0.1179±0.0000 | 0.1043±0.0003 | 0.1168±0.0002 |
| <b>SKCM</b> | BCM,IlluminaGA,autom.      | 1.7010±0.0162 | 2.6219±0.0210 | 0.0838±0.0000 | 0.1249±0.0001 |
| <b>SKCM</b> | BI,IlluminaGA              | 1.7919±0.0275 | 3.1573±0.0251 | 0.0773±0.0000 | 0.1248±0.0001 |
| <b>SKCM</b> | BI,IlluminaGA,autom.       | 1.0395±0.0138 | 3.2819±0.0229 | 0.0533±0.0001 | 0.1248±0.0001 |
| <b>STAD</b> | BCGSC,IlluminaHiSeq,autom. | 0.3589±0.0011 | 0.0857±0.0001 | 0.0529±0.0001 | 0.0605±0.0001 |
| <b>STAD</b> | BCM,IlluminaGA,autom.      | 1.4883±0.0086 | 1.0617±0.0043 | 0.1370±0.0000 | 0.1878±0.0005 |
| <b>STAD</b> | BI,IlluminaGA              | 2.0189±0.0093 | 1.0874±0.0055 | 0.1357±0.0001 | 0.1866±0.0006 |
| <b>STAD</b> | BI,IlluminaGA,autom.       | 3.1120±0.0094 | 1.4803±0.0064 | 0.1528±0.0001 | 0.2065±0.0006 |
| <b>STAD</b> | BI,IlluminaGA,cur.         | 1.8112±0.0111 | 1.2758±0.0063 | 0.1367±0.0000 | 0.2036±0.0006 |
| <b>TGCT</b> | BCGSC,IlluminaHiSeq_autom. | 0.7363±0.0005 | 1.6580±0.0319 | 0.1962±0.0003 | 0.3707±0.0006 |
| <b>TGCT</b> | BCM,IlluminaGA,autom.      | 0.6170±0.0003 | 0.1448±0.0000 | 0.1941±0.0003 | 0.2378±0.0006 |
| <b>TGCT</b> | BI,IlluminaGA,autom.       | 1.2249±0.0013 | 0.2745±0.0000 | 0.1645±0.0001 | 0.1473±0.0002 |
| <b>TGCT</b> | UCSC,IlluminaGA,autom.     | 0.5448±0.0007 | 0.1850±0.0001 | 0.2167±0.0003 | 0.2294±0.0002 |
| <b>THCA</b> | BCM,IlluminaGA,autom.      | 0.1573±0.0000 | 0.0413±0.0000 | 0.1217±0.0001 | 0.1093±0.0000 |

|             |                            |               |               |               |               |
|-------------|----------------------------|---------------|---------------|---------------|---------------|
| <b>THCA</b> | BI,IlluminaGA              | 0.2861±0.0001 | 0.0509±0.0000 | 0.1597±0.0002 | N/A           |
| <b>UVM</b>  | BCGSC,IlluminaHiSeq_autom. | 0.0847±0.0004 | 0.0135±0.0000 | 0.0642±0.0002 | 0.0589±0.0002 |
| <b>UVM</b>  | BCM,IlluminaGA,autom.      | 0.1240±0.0007 | 0.0405±0.0001 | 0.0599±0.0002 | 0.0578±0.0001 |
| <b>UVM</b>  | BI,IlluminaGA,autom.       | 0.1011±0.0005 | 0.0113±0.0000 | 0.0650±0.0002 | 0.0642±0.0002 |
| <b>UVM</b>  | UCSC,IlluminaGA,autom.     | 0.0650±0.0002 | 0.0146±0.0000 | 0.0749±0.0002 | 0.1221±0.0006 |

**Supplementary Table 3.** Median chronological ages of screened individuals with samples present in TCGA vs. median chronological ages of cancer incidence for women.

| Cancer type | Median age of cancer incidence | Median age of screened individuals (TCGA) |
|-------------|--------------------------------|-------------------------------------------|
| <b>BLCA</b> | 52.5                           | 73                                        |
| <b>BRCA</b> | 46.4                           | 59                                        |
| <b>CESC</b> | 32                             | 46                                        |
| <b>COAD</b> | 52.5                           | 68                                        |
| <b>HNSC</b> | 45                             | 64                                        |
| <b>LIHC</b> | 45                             | 63                                        |
| <b>OV</b>   | 45                             | 59                                        |
| <b>PAAD</b> | 50                             | 64                                        |
| <b>READ</b> | 54.7                           | 66.5                                      |
| <b>SKCM</b> | 39.4                           | 58                                        |
| <b>STAD</b> | 52.5                           | 69                                        |
| <b>THCA</b> | 29.3                           | 46                                        |
| <b>UCEC</b> | 44.8                           | 64                                        |
| <b>UCS</b>  | 44.8                           | 69                                        |
| <b>UVM</b>  | 45                             | 60                                        |



**Supplementary Table 4.** Median chronological ages of screened individuals with samples present in TCGA vs. median chronological ages of cancer incidence for men.

| Cancer type | Median age of cancer incidence | Median age of screened individuals (TCGA) |
|-------------|--------------------------------|-------------------------------------------|
| <b>BLCA</b> | 45                             | 68                                        |
| <b>BRCA</b> | 46                             | 61                                        |
| <b>COAD</b> | 52.5                           | 69                                        |
| <b>HNSC</b> | 41                             | 60                                        |
| <b>LIHC</b> | 45                             | 60.5                                      |
| <b>PAAD</b> | 52.5                           | 67                                        |
| <b>PRAD</b> | 45                             | 61                                        |
| <b>READ</b> | 51.3                           | 65                                        |
| <b>SKCM</b> | 45                             | 57                                        |
| <b>STAD</b> | 55                             | 66                                        |
| <b>TGCT</b> | 13.4                           | 31                                        |
| <b>THCA</b> | 36.4                           | 50.5                                      |
| <b>UVM</b>  | 42.9                           | 64                                        |
